# Supplementary material for: Characterization of the adaptive immune response of donors receiving live anthrax vaccine
Source: PubMed Central journal article supplement (PMC8687594; doi:10.1371/journal.pone.0260202), 2021-12-20

## Level of specific IgG to full-length PA of *B. anthracis* in the samples of blood serum from the donors.

The data are presented by a median titer with an interquartile range as a characteristic of the spread of values in the groups. The distribution was analysed using the Shapiro-Wilk test. The data were analysed using the Kruskal-Wallis test with multiple Dunn's comparisons in a One-Way ANOVA.

|               | Months after Vaccination |     |      |     | Nonvaccinated |
|---------------|--------------------------|-----|------|-----|---------------|
|               | 1-3                      | 4-8 | 9-11 | >12 |               |
| <b>Titers</b> | 200                      | 800 | 0    | 50  | 100           |
|               | 800                      | 400 | 400  | 25  | 0             |
|               | 100                      | 400 | 50   | 100 | 0             |
|               | 800                      | 100 | 100  | 100 | 400           |
|               | 800                      | 0   | 1600 | 100 | 200           |
|               | 100                      | 25  | 200  | 200 | 50            |
|               | 1600                     | 400 | 200  | 100 | 200           |
|               | 1600                     | 800 | 100  | 50  | 400           |
|               | 800                      | 400 | 0    | 50  | 0             |
|               | 800                      | 25  | 50   | 400 | 50            |
|               | 400                      | 100 | 50   | 25  | 400           |
|               | 100                      | 25  | 25   | 200 | 100           |
|               | 800                      | 50  | 100  | 0   | 0             |
|               | 800                      | 100 | 400  | 0   | 25            |
|               | 400                      | 25  | 200  | 0   | 400           |
|               | 400                      | 400 |      | 25  | 50            |
|               |                          | 0   |      | 100 | 0             |
|               |                          | 100 |      |     | 100           |
|               |                          | 100 |      |     | 50            |
|               |                          |     |      |     | 25            |
|               |                          |     |      | 200 |               |

| <b>One-Way ANOVA</b>                   |                |
|----------------------------------------|----------------|
| Table Analyzed                         | PA full-length |
| Kruskal-Wallis test                    |                |
| P value                                | < 0,0001       |
| Exact or approximate P value?          | Approximate    |
| P value summary                        | ****           |
| Do the medians vary signif. (P < 0.05) | Yes            |
| Number of groups                       | 5              |
| Kruskal-Wallis statistic               | 23,73          |
|                                        |                |
| Data summary                           |                |
| Number of treatments (columns)         | 5              |

| <b>ANOVA Multiple Comparison</b> |                 |              |                 |    |    |
|----------------------------------|-----------------|--------------|-----------------|----|----|
| Number of families               | 1               |              |                 |    |    |
| Number of comparisons per family | 10              |              |                 |    |    |
| Alpha                            | 0,05            |              |                 |    |    |
| Dunn's multiple comparisons test | Mean rank diff, | Significant? | Summary         |    |    |
| 1-3 vs. 4-8                      | 27,03           | Yes          | *               |    |    |
| 1-3 vs. 9-11                     | 28,24           | Yes          | *               |    |    |
| 1-3 vs. >12                      | 38,29           | Yes          | ***             |    |    |
| 1-3 vs. Nonvaccinated            | 34,9            | Yes          | ***             |    |    |
| 4-8 vs. 9-11                     | 1,209           | No           | ns              |    |    |
| 4-8 vs. >12                      | 11,25           | No           | ns              |    |    |
| 4-8 vs. Nonvaccinated            | 7,866           | No           | ns              |    |    |
| 9-11 vs. >12                     | 10,05           | No           | ns              |    |    |
| 9-11 vs. Nonvaccinated           | 6,657           | No           | ns              |    |    |
| >12 vs. Nonvaccinated            | -3,388          | No           | ns              |    |    |
| Test details                     | Mean rank 1     | Mean rank 2  | Mean rank diff, | n1 | n2 |
| 1-3 vs. 4-8                      | 70,88           | 43,84        | 27,03           | 16 | 19 |
| 1-3 vs. 9-11                     | 70,88           | 42,63        | 28,24           | 16 | 15 |
| 1-3 vs. >12                      | 70,88           | 32,59        | 38,29           | 16 | 17 |
| 1-3 vs. Nonvaccinated            | 70,88           | 35,98        | 34,9            | 16 | 21 |
| 4-8 vs. 9-11                     | 43,84           | 42,63        | 1,209           | 19 | 15 |
| 4-8 vs. >12                      | 43,84           | 32,59        | 11,25           | 19 | 17 |
| 4-8 vs. Nonvaccinated            | 43,84           | 35,98        | 7,866           | 19 | 21 |
| 9-11 vs. >12                     | 42,63           | 32,59        | 10,05           | 15 | 17 |
| 9-11 vs. Nonvaccinated           | 42,63           | 35,98        | 6,657           | 15 | 21 |
| >12 vs. Nonvaccinated            | 32,59           | 35,98        | -3,388          | 17 | 21 |

| Descriptive Statistics | Months after vaccination |       |       |       |               |
|------------------------|--------------------------|-------|-------|-------|---------------|
|                        | 1-3                      | 4-8   | 9-11  | >12   | Nonvaccinated |
| Number of values       | 16                       | 19    | 15    | 17    | 21            |
| Minimum                | 100                      | 0     | 0     | 0     | 0             |
| 25% Percentile         | 250                      | 25    | 50    | 25    | 12,5          |
| Median                 | 800                      | 100   | 100   | 50    | 50            |
| 75% Percentile         | 800                      | 400   | 200   | 100   | 200           |
| Maximum                | 1600                     | 800   | 1600  | 400   | 400           |
| Mean                   | 656,3                    | 223,7 | 231,7 | 89,71 | 131           |
| Std. Deviation         | 466,1                    | 256,5 | 399,4 | 100,8 | 148,5         |
| Std. Error of Mean     | 116,5                    | 58,85 | 103,1 | 24,45 | 32,41         |
| Lower 95% CI           | 407,9                    | 100,1 | 10,49 | 37,88 | 63,35         |
| Upper 95% CI           | 904,6                    | 347,3 | 452,8 | 141,5 | 198,6         |
| Mean ranks             | 70,88                    | 43,84 | 42,63 | 32,59 | 35,98         |

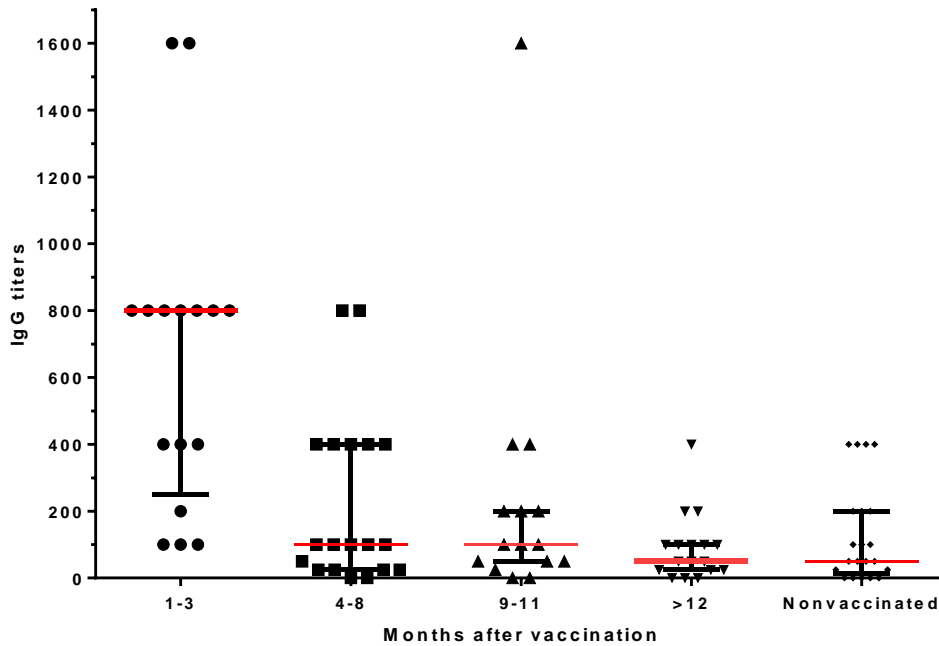

Supplement: pone.0260202.s016.pdf [file pone.0260202.s016.pdf]
