# Supplementary material for: Characterization of the adaptive immune response of donors receiving live anthrax vaccine
Source: PubMed Central journal article supplement (PMC8687594; doi:10.1371/journal.pone.0260202), 2021-12-20

## Level of specific IgG to full-length LF antigens of *B. anthracis* in the samples of blood serum from the donors.

The data are presented by a median titer with an interquartile range as a characteristic of the spread of values in the groups. The distribution was analysed using the Shapiro-Wilk test. The data were analysed using the Kruskal-Wallis test with multiple Dunn's comparisons in a One-Way ANOVA.

|               | Months after Vaccination |      |      |     | Nonvaccinated |
|---------------|--------------------------|------|------|-----|---------------|
|               | 1-3                      | 4-8  | 9-11 | >12 |               |
| <b>Titers</b> | 200                      | 100  | 0    | 0   | 50            |
|               | 800                      | 100  | 400  | 0   | 25            |
|               | 400                      | 200  | 400  | 0   | 25            |
|               | 100                      | 25   | 200  | 25  | 200           |
|               | 400                      | 400  | 800  | 0   | 50            |
|               | 200                      | 1600 | 100  | 200 | 200           |
|               | 800                      | 400  | 200  | 0   | 0             |
|               | 800                      | 800  | 100  | 0   | 50            |
|               | 400                      | 400  | 0    | 0   | 100           |
|               | 800                      | 800  | 100  | 200 | 50            |
|               | 800                      | 25   | 0    | 50  | 25            |
|               | 400                      | 25   | 25   | 0   | 0             |
|               | 100                      | 25   | 25   | 25  | 0             |
|               | 50                       | 100  | 200  | 25  | 0             |
|               | 400                      | 100  | 100  | 50  | 0             |
|               | 400                      | 400  |      | 25  | 0             |
|               |                          | 25   |      | 0   | 0             |
|               |                          | 100  |      |     | 100           |
|               | 25                       |      |      | 200 |               |
|               |                          |      |      | 100 |               |
|               |                          |      |      | 0   |               |

| <b>One-Way ANOVA</b>                   |                |
|----------------------------------------|----------------|
| Table Analyzed                         | LF full-length |
| Kruskal-Wallis test                    |                |
| P value                                | < 0,0001       |
| Exact or approximate P value?          | Approximate    |
| P value summary                        | ****           |
| Do the medians vary signif. (P < 0.05) | Yes            |
| Number of groups                       | 5              |
| Kruskal-Wallis statistic               | 36,17          |
| Data summary                           |                |
| Number of treatments (columns)         | 5              |
| Number of values (total)               | 88             |

| <b>ANOVA Multiple Comparison</b> |                 |              |                 |    |    |  |
|----------------------------------|-----------------|--------------|-----------------|----|----|--|
| Number of families               | 1               |              |                 |    |    |  |
| Number of comparisons per family | 4               |              |                 |    |    |  |
| Alpha                            | 0,05            |              |                 |    |    |  |
|                                  |                 |              |                 |    |    |  |
| Dunn's multiple comparisons test | Mean rank diff, | Significant? | Summary         |    |    |  |
|                                  |                 |              |                 |    |    |  |
| 1-3 vs. 4-8                      | 16              | No           | ns              |    |    |  |
| 1-3 vs. 9-11                     | 23,23           | Yes          | *               |    |    |  |
| 1-3 vs. >12                      | 46              | Yes          | ****            |    |    |  |
| 1-3 vs. Nonvaccinated            | 38,67           | Yes          | ****            |    |    |  |
|                                  |                 |              |                 |    |    |  |
|                                  |                 |              |                 |    |    |  |
| Test details                     | Mean rank 1     | Mean rank 2  | Mean rank diff, | n1 | n2 |  |
|                                  |                 |              |                 |    |    |  |
| 1-3 vs. 4-8                      | 70,03           | 54,03        | 16              | 16 | 19 |  |
| 1-3 vs. 9-11                     | 70,03           | 46,8         | 23,23           | 16 | 15 |  |
| 1-3 vs. >12                      | 70,03           | 24,03        | 46              | 16 | 17 |  |
| 1-3 vs. Nonvaccinated            | 70,03           | 31,36        | 38,67           | 16 | 21 |  |

## Descriptive Statistics

|                    | 1-3   | 4-8   | 9-11  | >12   | Nonvaccinated |
|--------------------|-------|-------|-------|-------|---------------|
| Number of values   | 16    | 19    | 15    | 17    | 21            |
| Minimum            | 50    | 25    | 0     | 0     | 0             |
| 25% Percentile     | 200   | 25    | 25    | 0     | 0             |
| Median             | 400   | 100   | 100   | 0     | 25            |
| 75% Percentile     | 800   | 400   | 200   | 37,5  | 100           |
| Maximum            | 800   | 1600  | 800   | 200   | 200           |
| Mean               | 440,6 | 297,4 | 176,7 | 35,29 | 55,95         |
| Std. Deviation     | 277,6 | 400,9 | 216   | 64,38 | 69,33         |
| Std. Error of Mean | 69,41 | 91,98 | 55,77 | 15,62 | 15,13         |
| Lower 95% CI       | 292,7 | 104,1 | 57,06 | 2,191 | 24,39         |
| Upper 95% CI       | 588,6 | 490,6 | 296,3 | 68,4  | 87,51         |
| Mean ranks         | 70,03 | 54,03 | 46,8  | 24,03 | 31,36         |

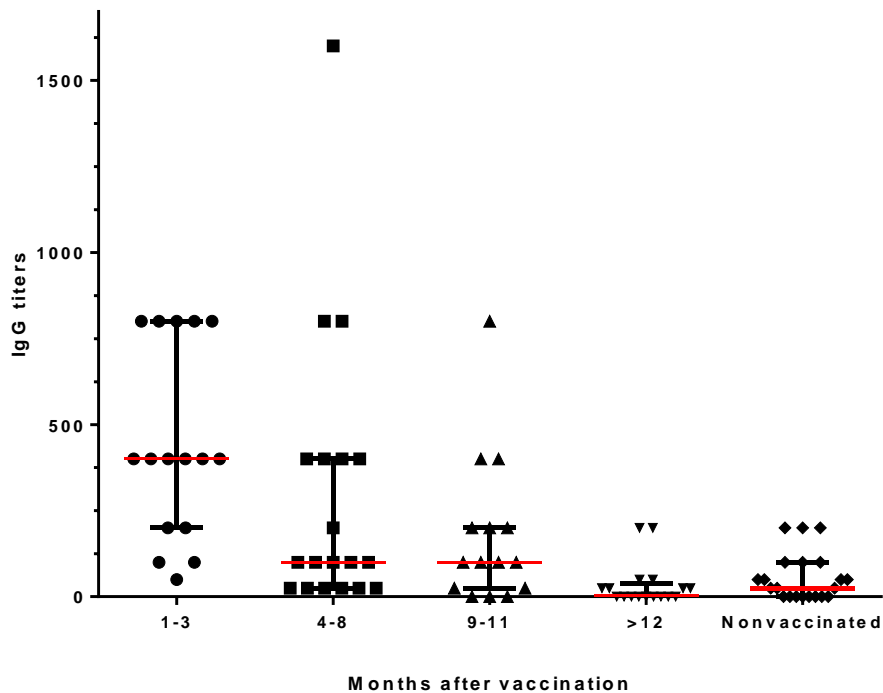

Supplement: pone.0260202.s017.pdf [file pone.0260202.s017.pdf]
