# Supplementary material for: Characterization of the adaptive immune response of donors receiving live anthrax vaccine
Source: PubMed Central journal article supplement (PMC8687594; doi:10.1371/journal.pone.0260202), 2021-12-20

## Level of specific IgG to spores antigens of *B. anthracis* in the samples of blood serum from the donors.

The data are presented by a median titer with an interquartile range as a characteristic of the spread of values in the groups. The distribution was analysed using the Shapiro-Wilk test. The data were analysed using the Kruskal-Wallis test with multiple Dunn's comparisons in a One-Way ANOVA.

|               | Months after Vaccination |      |      |      | Nonvaccinated |
|---------------|--------------------------|------|------|------|---------------|
|               | 1-3                      | 4-8  | 9-11 | >12  |               |
| <b>Titers</b> | 200                      | 200  | 0    | 200  | 200           |
|               | 1600                     | 400  | 200  | 200  | 100           |
|               | 200                      | 400  | 100  | 100  | 0             |
|               | 400                      | 800  | 400  | 0    | 0             |
|               | 1600                     | 400  | 800  | 200  | 50            |
|               | 800                      | 1600 | 400  | 1600 | 200           |
|               | 3200                     | 800  | 200  | 200  | 50            |
|               | 1600                     | 1600 | 200  | 200  | 100           |
|               | 3200                     | 3200 | 0    | 400  | 800           |
|               | 1600                     | 200  | 25   | 800  | 400           |
|               | 800                      | 200  | 50   | 400  | 0             |
|               | 800                      | 100  | 100  | 200  | 50            |
|               | 800                      | 400  | 100  | 200  | 0             |
|               | 400                      | 200  | 200  | 0    | 50            |
|               | 400                      | 100  | 400  | 400  | 100           |
|               | 1600                     | 800  |      | 200  | 50            |
|               |                          | 50   |      | 0    | 25            |
|               |                          | 400  |      |      | 25            |
|               |                          | 200  |      |      | 0             |
|               |                          |      |      |      | 100           |
|               |                          |      |      | 0    |               |

| <b>One-Way ANOVA</b>                   |                      |
|----------------------------------------|----------------------|
| <b>Table Analyzed</b>                  | <b>Spores titers</b> |
|                                        |                      |
| <b>Kruskal-Wallis test</b>             |                      |
| P value                                | < 0,0001             |
| Exact or approximate P value?          | Approximate          |
| P value summary                        | ****                 |
| Do the medians vary signif. (P < 0.05) | Yes                  |
| Number of groups                       | 5                    |
| Kruskal-Wallis statistic               | 38,63                |
|                                        |                      |
| <b>Data summary</b>                    |                      |
| Number of treatments (columns)         | 5                    |
| Number of values (total)               | 88                   |

| <b>ANOVA Multiple Comparison</b>        |                        |                     |                        |           |           |
|-----------------------------------------|------------------------|---------------------|------------------------|-----------|-----------|
|                                         |                        |                     |                        |           |           |
| <b>Number of families</b>               | 1                      |                     |                        |           |           |
| <b>Number of comparisons per family</b> | 10                     |                     |                        |           |           |
| <b>Alpha</b>                            | 0,05                   |                     |                        |           |           |
|                                         |                        |                     |                        |           |           |
| <b>Dunn's multiple comparisons test</b> | <b>Mean rank diff,</b> | <b>Significant?</b> | <b>Summary</b>         |           |           |
|                                         |                        |                     |                        |           |           |
| <b>1-3 vs. 4-8</b>                      | 15,78                  | No                  | ns                     |           |           |
| <b>1-3 vs. 9-11</b>                     | 34,77                  | Yes                 | **                     |           |           |
| <b>1-3 vs. &gt;12</b>                   | 28,94                  | Yes                 | **                     |           |           |
| <b>1-3 vs. Nonvaccinated</b>            | 48,37                  | Yes                 | ****                   |           |           |
| <b>4-8 vs. 9-11</b>                     | 18,98                  | No                  | ns                     |           |           |
| <b>4-8 vs. &gt;12</b>                   | 13,15                  | No                  | ns                     |           |           |
| <b>4-8 vs. Nonvaccinated</b>            | 32,59                  | Yes                 | ***                    |           |           |
| <b>9-11 vs. &gt;12</b>                  | -5,829                 | No                  | ns                     |           |           |
| <b>9-11 vs. Nonvaccinated</b>           | 13,6                   | No                  | ns                     |           |           |
| <b>&gt;12 vs. Nonvaccinated</b>         | 19,43                  | No                  | ns                     |           |           |
|                                         |                        |                     |                        |           |           |
|                                         |                        |                     |                        |           |           |
| <b>Test details</b>                     | <b>Mean rank 1</b>     | <b>Mean rank 2</b>  | <b>Mean rank diff,</b> | <b>n1</b> | <b>n2</b> |
|                                         |                        |                     |                        |           |           |
| <b>1-3 vs. 4-8</b>                      | 70,97                  | 55,18               | 15,78                  | 16        | 19        |
| <b>1-3 vs. 9-11</b>                     | 70,97                  | 36,2                | 34,77                  | 16        | 15        |
| <b>1-3 vs. &gt;12</b>                   | 70,97                  | 42,03               | 28,94                  | 16        | 17        |
| <b>1-3 vs. Nonvaccinated</b>            | 70,97                  | 22,6                | 48,37                  | 16        | 21        |
| <b>4-8 vs. 9-11</b>                     | 55,18                  | 36,2                | 18,98                  | 19        | 15        |
| <b>4-8 vs. &gt;12</b>                   | 55,18                  | 42,03               | 13,15                  | 19        | 17        |
| <b>4-8 vs. Nonvaccinated</b>            | 55,18                  | 22,6                | 32,59                  | 19        | 21        |
| <b>9-11 vs. &gt;12</b>                  | 36,2                   | 42,03               | -5,829                 | 15        | 17        |
| <b>9-11 vs. Nonvaccinated</b>           | 36,2                   | 22,6                | 13,6                   | 15        | 21        |
| <b>&gt;12 vs. Nonvaccinated</b>         | 42,03                  | 22,6                | 19,43                  | 17        | 21        |

| Descriptive Statistics |       |       |       |       |               |
|------------------------|-------|-------|-------|-------|---------------|
|                        | 1-3   | 4-8   | 9-11  | >12   | Nonvaccinated |
| Number of values       | 16    | 19    | 15    | 17    | 21            |
| Minimum                | 200   | 50    | 0     | 0     | 0             |
| 25% Percentile         | 400   | 200   | 50    | 150   | 0             |
| Median                 | 800   | 400   | 200   | 200   | 50            |
| 75% Percentile         | 1600  | 800   | 400   | 400   | 100           |
| Maximum                | 3200  | 3200  | 800   | 1600  | 800           |
| Mean                   | 1200  | 634,2 | 211,7 | 311,8 | 109,5         |
| Std. Deviation         | 943,8 | 769,6 | 214   | 383,9 | 184,6         |
| Std. Error of Mean     | 235,9 | 176,6 | 55,25 | 93,1  | 40,29         |
| Lower 95% CI           | 697,1 | 263,3 | 93,16 | 114,4 | 25,48         |
| Upper 95% CI           | 1703  | 1005  | 330,2 | 509,1 | 193,6         |
| Mean ranks             | 70,97 | 55,18 | 36,2  | 42,03 | 22,6          |

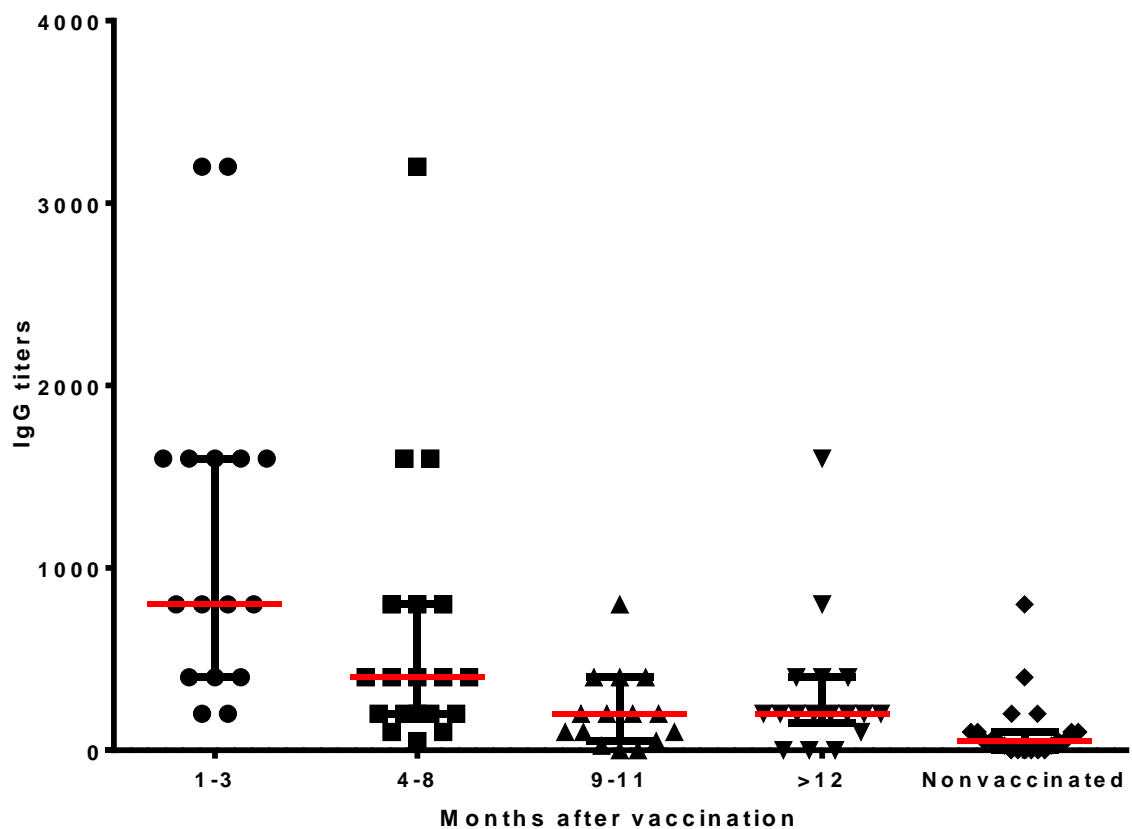

Supplement: pone.0260202.s018.pdf [file pone.0260202.s018.pdf]
