# Supplementary material for: Characterization of the adaptive immune response of donors receiving live anthrax vaccine
Source: PubMed Central journal article supplement (PMC8687594; doi:10.1371/journal.pone.0260202), 2021-12-20

## Level of specific IgG to PA-D1 of *B. anthracis* in the samples of blood serum from the donors.

The data are presented by a median titer with an interquartile range as a characteristic of the spread of values in the groups. The distribution was analysed using the Shapiro-Wilk test. The data were analysed using the Kruskal-Wallis test with multiple Dunn's comparisons in a One-Way ANOVA.

|               | Months after Vaccination |      |      |     | Nonvaccinated |
|---------------|--------------------------|------|------|-----|---------------|
|               | 1-3                      | 4-8  | 9-11 | >12 |               |
| <b>Titers</b> | 100                      | 50   | 0    | 0   | 100           |
|               | 400                      | 50   | 100  | 100 | 25            |
|               | 400                      | 200  | 200  | 200 | 25            |
|               | 200                      | 100  | 200  | 50  | 0             |
|               | 800                      | 200  | 400  | 0   | 500           |
|               | 200                      | 400  | 400  | 100 | 100           |
|               | 400                      | 800  | 200  | 200 | 50            |
|               | 1600                     | 800  | 100  | 50  | 50            |
|               | 400                      | 1600 | 0    | 25  | 50            |
|               | 800                      | 200  | 200  | 100 | 0             |
|               | 200                      | 50   | 200  | 25  | 0             |
|               | 400                      | 25   | 200  | 0   | 0             |
|               | 100                      | 50   | 100  | 25  | 25            |
|               | 200                      | 100  | 400  | 50  | 25            |
|               | 200                      | 100  | 100  | 25  | 0             |
|               | 400                      | 200  |      | 100 | 0             |
|               |                          | 400  |      | 25  | 25            |
|               |                          | 50   |      |     | 25            |
|               |                          | 200  |      |     | 0             |
|               |                          |      |      |     | 0             |
|               |                          |      |      | 100 |               |

| <b>One-Way ANOVA</b>                   |                     |
|----------------------------------------|---------------------|
| <b>Table Analyzed</b>                  | <b>PA-D1 titers</b> |
|                                        |                     |
| <b>Kruskal-Wallis test</b>             |                     |
| P value                                | < 0,0001            |
| Exact or approximate P value?          | Approximate         |
| P value summary                        | ****                |
| Do the medians vary signif. (P < 0.05) | Yes                 |
| Number of groups                       | 5                   |
| Kruskal-Wallis statistic               | 40,49               |
|                                        |                     |
| Data summary                           |                     |
| Number of treatments (columns)         | 5                   |
| Number of values (total)               | 88                  |

| <b>ANOVA Multiple Comparison</b>        |                        |                     |                        |           |           |
|-----------------------------------------|------------------------|---------------------|------------------------|-----------|-----------|
|                                         |                        |                     |                        |           |           |
| <b>Number of families</b>               | 1                      |                     |                        |           |           |
| <b>Number of comparisons per family</b> | 10                     |                     |                        |           |           |
| <b>Alpha</b>                            | 0,05                   |                     |                        |           |           |
|                                         |                        |                     |                        |           |           |
| <b>Dunn's multiple comparisons test</b> | <b>Mean rank diff,</b> | <b>Significant?</b> | <b>Summary</b>         |           |           |
|                                         |                        |                     |                        |           |           |
| <b>1-3 vs. 4-8</b>                      | 15,42                  | No                  | ns                     |           |           |
| <b>1-3 vs. 9-11</b>                     | 16,71                  | No                  | ns                     |           |           |
| <b>1-3 vs. &gt;12</b>                   | 39,17                  | Yes                 | ****                   |           |           |
| <b>1-3 vs. Nonvaccinated</b>            | 46,38                  | Yes                 | ****                   |           |           |
| <b>4-8 vs. 9-11</b>                     | 1,295                  | No                  | ns                     |           |           |
| <b>4-8 vs. &gt;12</b>                   | 23,75                  | Yes                 | *                      |           |           |
| <b>4-8 vs. Nonvaccinated</b>            | 30,97                  | Yes                 | **                     |           |           |
| <b>9-11 vs. &gt;12</b>                  | 22,45                  | No                  | ns                     |           |           |
| <b>9-11 vs. Nonvaccinated</b>           | 29,67                  | Yes                 | **                     |           |           |
| <b>&gt;12 vs. Nonvaccinated</b>         | 7,218                  | No                  | ns                     |           |           |
|                                         |                        |                     |                        |           |           |
|                                         |                        |                     |                        |           |           |
| <b>Test details</b>                     | <b>Mean rank 1</b>     | <b>Mean rank 2</b>  | <b>Mean rank diff,</b> | <b>n1</b> | <b>n2</b> |
|                                         |                        |                     |                        |           |           |
| <b>1-3 vs. 4-8</b>                      | 69,31                  | 53,89               | 15,42                  | 16        | 19        |
| <b>1-3 vs. 9-11</b>                     | 69,31                  | 52,6                | 16,71                  | 16        | 15        |
| <b>1-3 vs. &gt;12</b>                   | 69,31                  | 30,15               | 39,17                  | 16        | 17        |
| <b>1-3 vs. Nonvaccinated</b>            | 69,31                  | 22,93               | 46,38                  | 16        | 21        |
| <b>4-8 vs. 9-11</b>                     | 53,89                  | 52,6                | 1,295                  | 19        | 15        |
| <b>4-8 vs. &gt;12</b>                   | 53,89                  | 30,15               | 23,75                  | 19        | 17        |
| <b>4-8 vs. Nonvaccinated</b>            | 53,89                  | 22,93               | 30,97                  | 19        | 21        |
| <b>9-11 vs. &gt;12</b>                  | 52,6                   | 30,15               | 22,45                  | 15        | 17        |
| <b>9-11 vs. Nonvaccinated</b>           | 52,6                   | 22,93               | 29,67                  | 15        | 21        |
| <b>&gt;12 vs. Nonvaccinated</b>         | 30,15                  | 22,93               | 7,218                  | 17        | 21        |

| Descriptive Statistics |       |       |       |       |               |
|------------------------|-------|-------|-------|-------|---------------|
|                        | 1-3   | 4-8   | 9-11  | >12   | Nonvaccinated |
| Number of values       | 16    | 19    | 15    | 17    | 21            |
| Minimum                | 100,0 | 25,00 | 0,0   | 0,0   | 0,0           |
| 25% Percentile         | 200,0 | 50,00 | 100,0 | 25,00 | 0,0           |
| Median                 | 400,0 | 200,0 | 200,0 | 50,00 | 25,00         |
| 75% Percentile         | 400,0 | 400,0 | 200,0 | 100,0 | 50,00         |
| Maximum                | 1600  | 1600  | 400,0 | 200,0 | 500,0         |
| Mean                   | 425,0 | 293,4 | 186,7 | 63,24 | 52,38         |
| Std. Deviation         | 376,8 | 392,1 | 130,2 | 62,57 | 108,1         |
| Std. Error of Mean     | 94,21 | 89,95 | 33,62 | 15,18 | 23,59         |
| Lower 95% CI           | 224,2 | 104,4 | 114,6 | 31,06 | 3,183         |
| Upper 95% CI           | 625,8 | 482,4 | 258,8 | 95,41 | 101,6         |
| Mean ranks             | 69,31 | 53,89 | 52,60 | 30,15 | 22,93         |

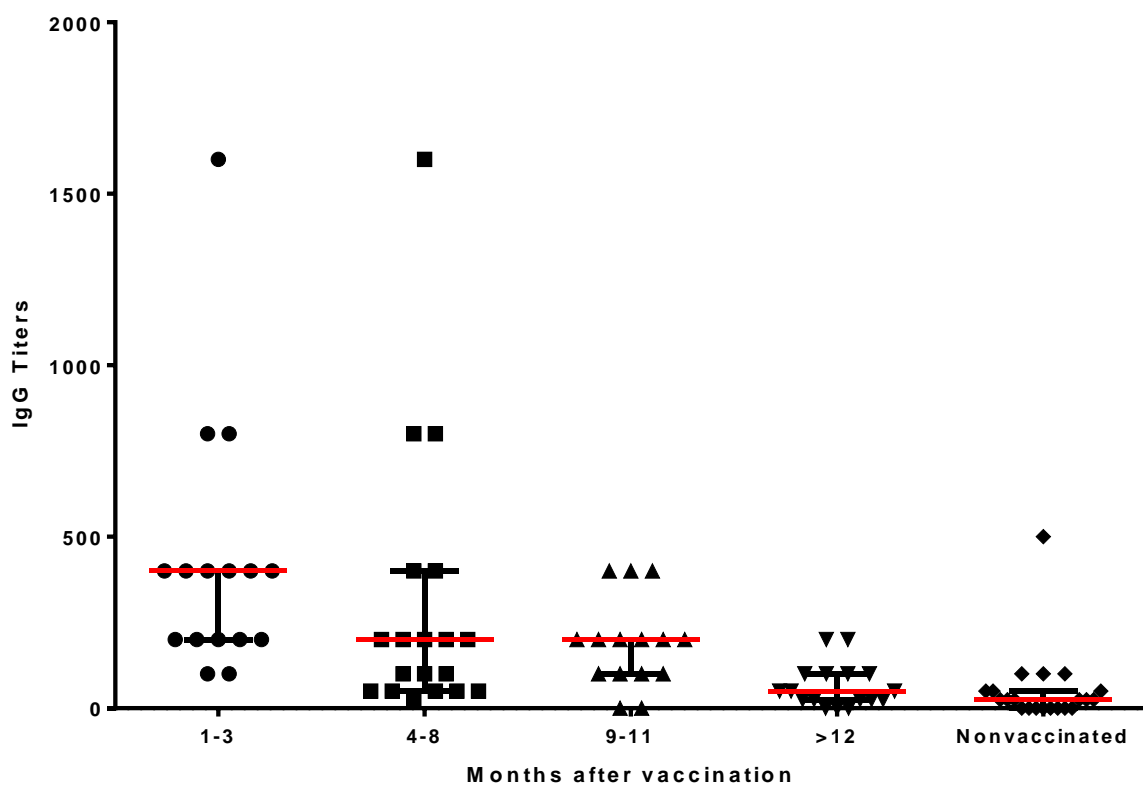

Supplement: pone.0260202.s019.pdf [file pone.0260202.s019.pdf]
