# Supplementary material for: Characterization of the adaptive immune response of donors receiving live anthrax vaccine
Source: PubMed Central journal article supplement (PMC8687594; doi:10.1371/journal.pone.0260202), 2021-12-20

## Level of specific IgG to PA-D2 of *B. anthracis* in the samples of blood serum from the donors.

The data are presented by a median titer with an interquartile range as a characteristic of the spread of values in the groups. The distribution was analysed using the Shapiro-Wilk test. The data were analysed using the Kruskal-Wallis test with multiple Dunn's comparisons in a One-Way ANOVA.

|               | Months after Vaccination |      |      |     | Nonvaccinated |
|---------------|--------------------------|------|------|-----|---------------|
|               | 1-3                      | 4-8  | 9-11 | >12 |               |
| <b>Titers</b> | 400                      | 200  | 0    | 25  | 100           |
|               | 800                      | 100  | 100  | 200 | 25            |
|               | 800                      | 200  | 25   | 100 | 0             |
|               | 800                      | 400  | 25   | 200 | 0             |
|               | 3200                     | 0    | 1600 | 0   | 0             |
|               | 800                      | 50   | 100  | 100 | 100           |
|               | 1600                     | 1600 | 200  | 0   | 50            |
|               | 400                      | 400  | 200  | 50  | 50            |
|               | 400                      | 100  | 0    | 100 | 25            |
|               | 800                      | 200  | 50   | 200 | 0             |
|               | 200                      | 25   | 100  | 50  | 0             |
|               | 200                      | 100  | 200  | 200 | 0             |
|               | 400                      | 0    | 25   | 0   | 25            |
|               | 200                      | 100  | 800  | 25  | 50            |
|               | 200                      | 0    | 400  | 0   | 0             |
|               | 400                      | 25   |      | 50  | 0             |
|               |                          | 0    |      | 0   | 25            |
|               |                          | 0    |      |     | 25            |
|               |                          | 50   |      |     | 0             |
|               |                          |      |      |     | 0             |
|               |                          |      |      | 100 |               |

| <b>One-Way ANOVA</b>                   |              |
|----------------------------------------|--------------|
| Table Analyzed                         | PA-D2 titers |
|                                        |              |
| <b>Kruskal-Wallis test</b>             |              |
| P value                                | < 0,0001     |
| Exact or approximate P value?          | Approximate  |
| P value summary                        | ****         |
| Do the medians vary signif. (P < 0.05) | Yes          |
| Number of groups                       | 5            |
| Kruskal-Wallis statistic               | 38,66        |
|                                        |              |
| Data summary                           |              |
| Number of treatments (columns)         | 5            |
| Number of values (total)               | 88           |

| <b>ANOVA Multiple Comparison</b>        |                        |                     |                        |           |           |
|-----------------------------------------|------------------------|---------------------|------------------------|-----------|-----------|
|                                         |                        |                     |                        |           |           |
| <b>Number of families</b>               | 1                      |                     |                        |           |           |
| <b>Number of comparisons per family</b> | 10                     |                     |                        |           |           |
| <b>Alpha</b>                            | 0,05                   |                     |                        |           |           |
|                                         |                        |                     |                        |           |           |
| <b>Dunn's multiple comparisons test</b> | <b>Mean rank diff,</b> | <b>Significant?</b> | <b>Summary</b>         |           |           |
|                                         |                        |                     |                        |           |           |
| <b>1-3 vs. 4-8</b>                      | 32,45                  | Yes                 | **                     |           |           |
| <b>1-3 vs. 9-11</b>                     | 26,83                  | Yes                 | *                      |           |           |
| <b>1-3 vs. &gt;12</b>                   | 38,12                  | Yes                 | ***                    |           |           |
| <b>1-3 vs. Nonvaccinated</b>            | 50,52                  | Yes                 | ****                   |           |           |
| <b>4-8 vs. 9-11</b>                     | -5,614                 | No                  | ns                     |           |           |
| <b>4-8 vs. &gt;12</b>                   | 5,67                   | No                  | ns                     |           |           |
| <b>4-8 vs. Nonvaccinated</b>            | 18,08                  | No                  | ns                     |           |           |
| <b>9-11 vs. &gt;12</b>                  | 11,28                  | No                  | ns                     |           |           |
| <b>9-11 vs. Nonvaccinated</b>           | 23,69                  | No                  | ns                     |           |           |
| <b>&gt;12 vs. Nonvaccinated</b>         | 12,41                  | No                  | ns                     |           |           |
|                                         |                        |                     |                        |           |           |
|                                         |                        |                     |                        |           |           |
| <b>Test details</b>                     | <b>Mean rank 1</b>     | <b>Mean rank 2</b>  | <b>Mean rank diff,</b> | <b>n1</b> | <b>n2</b> |
|                                         |                        |                     |                        |           |           |
| <b>1-3 vs. 4-8</b>                      | 75,5                   | 43,05               | 32,45                  | 16        | 19        |
| <b>1-3 vs. 9-11</b>                     | 75,5                   | 48,67               | 26,83                  | 16        | 15        |
| <b>1-3 vs. &gt;12</b>                   | 75,5                   | 37,38               | 38,12                  | 16        | 17        |
| <b>1-3 vs. Nonvaccinated</b>            | 75,5                   | 24,98               | 50,52                  | 16        | 21        |
| <b>4-8 vs. 9-11</b>                     | 43,05                  | 48,67               | -5,614                 | 19        | 15        |
| <b>4-8 vs. &gt;12</b>                   | 43,05                  | 37,38               | 5,67                   | 19        | 17        |
| <b>4-8 vs. Nonvaccinated</b>            | 43,05                  | 24,98               | 18,08                  | 19        | 21        |
| <b>9-11 vs. &gt;12</b>                  | 48,67                  | 37,38               | 11,28                  | 15        | 17        |
| <b>9-11 vs. Nonvaccinated</b>           | 48,67                  | 24,98               | 23,69                  | 15        | 21        |
| <b>&gt;12 vs. Nonvaccinated</b>         | 37,38                  | 24,98               | 12,41                  | 17        | 21        |

| Descriptive Statistics |       |       |       |       |               |
|------------------------|-------|-------|-------|-------|---------------|
|                        | 1-3   | 4-8   | 9-11  | >12   | Nonvaccinated |
| Number of values       | 16    | 19    | 15    | 17    | 21            |
| Minimum                | 200   | 0     | 0     | 0     | 0             |
| 25% Percentile         | 250   | 0     | 25    | 0     | 0             |
| Median                 | 400   | 100   | 100   | 50    | 25            |
| 75% Percentile         | 800   | 200   | 200   | 150   | 50            |
| Maximum                | 3200  | 1600  | 1600  | 200   | 100           |
| Mean                   | 725   | 186,8 | 255   | 76,47 | 27,38         |
| Std. Deviation         | 755   | 363,8 | 425,9 | 78,79 | 35,27         |
| Std. Error of Mean     | 188,7 | 83,47 | 110   | 19,11 | 7,697         |
| Lower 95% CI           | 322,7 | 11,47 | 19,16 | 35,96 | 11,33         |
| Upper 95% CI           | 1127  | 362,2 | 490,8 | 117   | 43,44         |
| Mean ranks             | 75,5  | 43,05 | 48,67 | 37,38 | 24,98         |

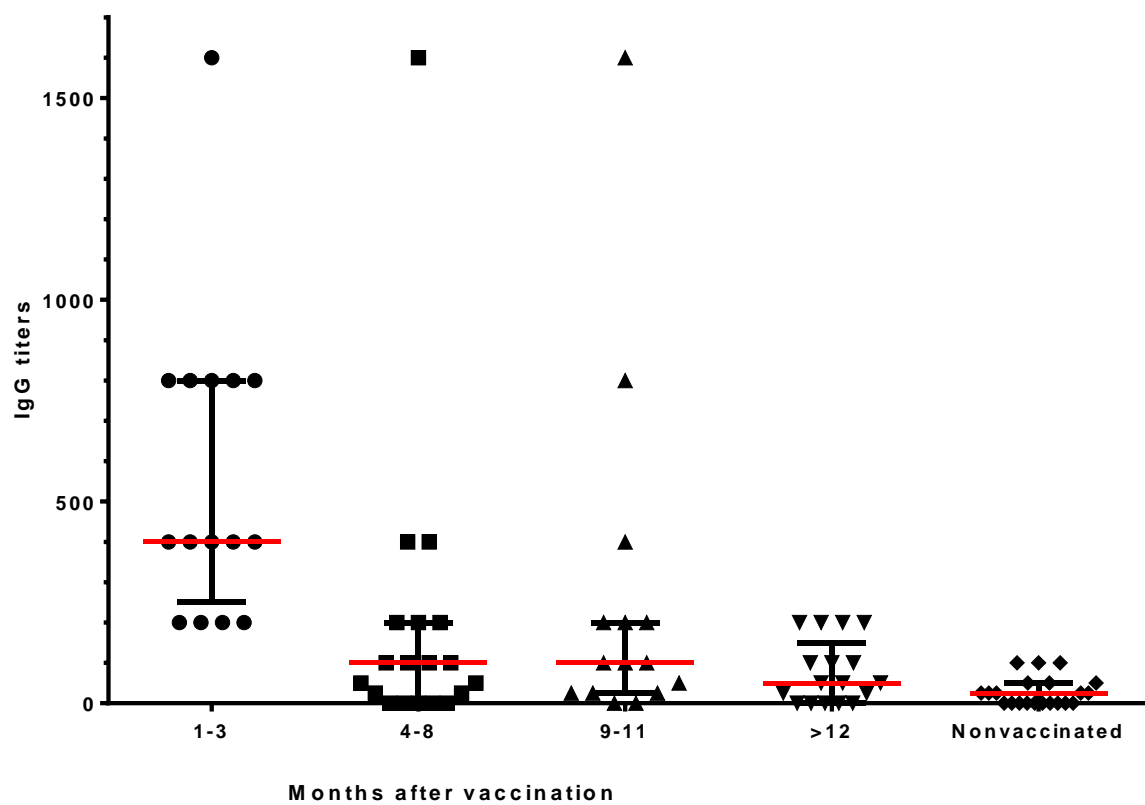

Supplement: pone.0260202.s020.pdf [file pone.0260202.s020.pdf]
