# Supplementary material for: Characterization of the adaptive immune response of donors receiving live anthrax vaccine
Source: PubMed Central journal article supplement (PMC8687594; doi:10.1371/journal.pone.0260202), 2021-12-20

## Level of specific IgG to PA-D4 of *B. anthracis* in the samples of blood serum from the donors.

The data are presented by a median titer with an interquartile range as a characteristic of the spread of values in the groups. The distribution was analysed using the Shapiro-Wilk test. The data were analysed using the Kruskal-Wallis test with multiple Dunn's comparisons in a One-Way ANOVA.

|               | Months after Vaccination |     |      |     | Nonvaccinated |
|---------------|--------------------------|-----|------|-----|---------------|
|               | 1-3                      | 4-8 | 9-11 | >12 |               |
| <b>Titers</b> | 50                       | 200 | 0    | 25  | 25            |
|               | 400                      | 800 | 400  | 400 | 0             |
|               | 800                      | 50  | 50   | 50  | 0             |
|               | 200                      | 50  | 50   | 50  | 100           |
|               | 200                      | 25  | 200  | 200 | 50            |
|               | 200                      | 200 | 100  | 100 | 0             |
|               | 400                      | 400 | 200  | 200 | 50            |
|               | 1600                     | 400 | 200  | 200 | 0             |
|               | 200                      | 400 | 0    | 0   | 0             |
|               | 400                      | 200 | 100  | 100 | 200           |
|               | 100                      | 100 | 400  | 400 | 50            |
|               | 200                      | 200 | 400  | 400 | 50            |
|               | 400                      | 100 | 200  | 0   | 0             |
|               | 25                       | 400 | 200  | 0   | 0             |
|               | 400                      | 100 | 100  | 0   | 25            |
|               | 100                      | 200 |      | 50  | 400           |
|               |                          | 25  |      | 100 | 0             |
|               |                          | 50  |      |     | 25            |
|               | 25                       |     |      | 0   |               |
|               |                          |     |      | 0   |               |
|               |                          |     |      | 25  |               |

| <b>One-Way ANOVA</b>                   |              |
|----------------------------------------|--------------|
| Table Analyzed                         | PA-D4 titers |
| <b>Kruskal-Wallis test</b>             |              |
| P value                                | < 0,0001     |
| Exact or approximate P value?          | Approximate  |
| P value summary                        | ****         |
| Do the medians vary signif. (P < 0.05) | Yes          |
| Number of groups                       | 5            |
| Kruskal-Wallis statistic               | 26,7         |
| <b>Data summary</b>                    |              |
| Number of treatments (columns)         | 5            |
| Number of values (total)               | 88           |

| <b>ANOVA Multiple Comparison</b>        |                        |                     |                        |           |           |
|-----------------------------------------|------------------------|---------------------|------------------------|-----------|-----------|
|                                         |                        |                     |                        |           |           |
| <b>Number of families</b>               | 1                      |                     |                        |           |           |
| <b>Number of comparisons per family</b> | 10                     |                     |                        |           |           |
| <b>Alpha</b>                            | 0,05                   |                     |                        |           |           |
|                                         |                        |                     |                        |           |           |
| <b>Dunn's multiple comparisons test</b> | <b>Mean rank diff,</b> | <b>Significant?</b> | <b>Summary</b>         |           |           |
|                                         |                        |                     |                        |           |           |
| <b>1-3 vs. 4-8</b>                      | 10,7                   | No                  | ns                     |           |           |
| <b>1-3 vs. 9-11</b>                     | 12,95                  | No                  | ns                     |           |           |
| <b>1-3 vs. &gt;12</b>                   | 21,75                  | No                  | ns                     |           |           |
| <b>1-3 vs. Nonvaccinated</b>            | 39,94                  | Yes                 | ****                   |           |           |
| <b>4-8 vs. 9-11</b>                     | 2,253                  | No                  | ns                     |           |           |
| <b>4-8 vs. &gt;12</b>                   | 11,05                  | No                  | ns                     |           |           |
| <b>4-8 vs. Nonvaccinated</b>            | 29,24                  | Yes                 | **                     |           |           |
| <b>9-11 vs. &gt;12</b>                  | 8,8                    | No                  | ns                     |           |           |
| <b>9-11 vs. Nonvaccinated</b>           | 26,99                  | Yes                 | *                      |           |           |
| <b>&gt;12 vs. Nonvaccinated</b>         | 18,19                  | No                  | ns                     |           |           |
|                                         |                        |                     |                        |           |           |
|                                         |                        |                     |                        |           |           |
| <b>Test details</b>                     | <b>Mean rank 1</b>     | <b>Mean rank 2</b>  | <b>Mean rank diff,</b> | <b>n1</b> | <b>n2</b> |
|                                         |                        |                     |                        |           |           |
| <b>1-3 vs. 4-8</b>                      | 62,75                  | 52,05               | 10,7                   | 16        | 19        |
| <b>1-3 vs. 9-11</b>                     | 62,75                  | 49,8                | 12,95                  | 16        | 15        |
| <b>1-3 vs. &gt;12</b>                   | 62,75                  | 41                  | 21,75                  | 16        | 17        |
| <b>1-3 vs. Nonvaccinated</b>            | 62,75                  | 22,81               | 39,94                  | 16        | 21        |
| <b>4-8 vs. 9-11</b>                     | 52,05                  | 49,8                | 2,253                  | 19        | 15        |
| <b>4-8 vs. &gt;12</b>                   | 52,05                  | 41                  | 11,05                  | 19        | 17        |
| <b>4-8 vs. Nonvaccinated</b>            | 52,05                  | 22,81               | 29,24                  | 19        | 21        |
| <b>9-11 vs. &gt;12</b>                  | 49,8                   | 41                  | 8,8                    | 15        | 17        |
| <b>9-11 vs. Nonvaccinated</b>           | 49,8                   | 22,81               | 26,99                  | 15        | 21        |
| <b>&gt;12 vs. Nonvaccinated</b>         | 41                     | 22,81               | 18,19                  | 17        | 21        |

| Descriptive Statistics |       |       |       |       |               |
|------------------------|-------|-------|-------|-------|---------------|
|                        | 1-3   | 4-8   | 9-11  | >12   | Nonvaccinated |
| Number of values       | 16    | 19    | 15    | 17    | 21            |
| Minimum                | 25    | 25    | 0     | 0     | 0             |
| 25% Percentile         | 125   | 50    | 50    | 12,5  | 0             |
| Median                 | 200   | 200   | 200   | 100   | 25            |
| 75% Percentile         | 400   | 400   | 200   | 200   | 50            |
| Maximum                | 1600  | 800   | 400   | 400   | 400           |
| Mean                   | 354,7 | 206,6 | 173,3 | 133,8 | 47,62         |
| Std. Deviation         | 383,9 | 198,4 | 137,4 | 144,4 | 93,51         |
| Std. Error of Mean     | 95,97 | 45,52 | 35,48 | 35,03 | 20,41         |
| Lower 95% CI           | 150,1 | 111   | 97,24 | 59,57 | 5,054         |
| Upper 95% CI           | 559,2 | 302,2 | 249,4 | 208,1 | 90,18         |
| Mean ranks             | 62,75 | 52,05 | 49,8  | 41    | 22,81         |

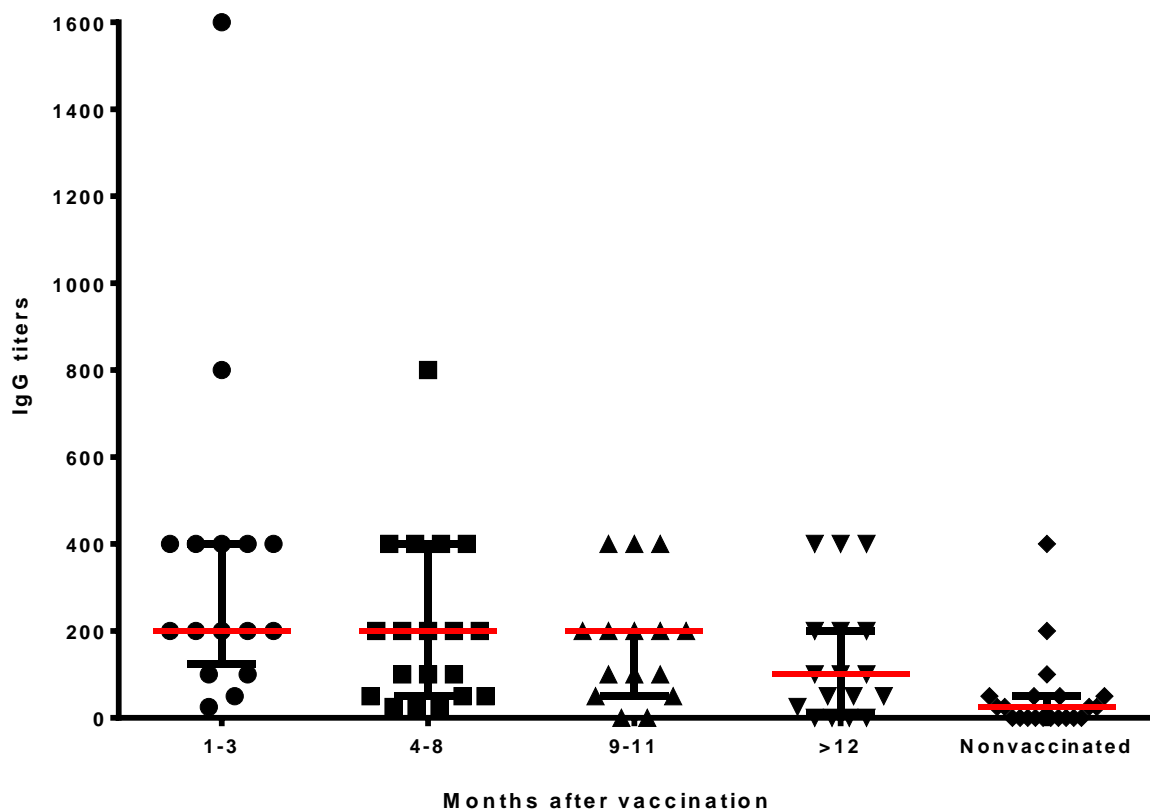

Supplement: pone.0260202.s022.pdf [file pone.0260202.s022.pdf]
