# Supplementary material for: Characterization of the adaptive immune response of donors receiving live anthrax vaccine
Source: PubMed Central journal article supplement (PMC8687594; doi:10.1371/journal.pone.0260202), 2021-12-20

## Level of specific IgG to LF-D1 of *B. anthracis* in the samples of blood serum from the donors.

The data are presented by a median titer with an interquartile range as a characteristic of the spread of values in the groups. The distribution was analysed using the Shapiro-Wilk test. The data were analysed using the Kruskal-Wallis test with multiple Dunn's comparisons in a One-Way ANOVA.

|               | Months after Vaccination |     |      |     | Nonvaccinated |
|---------------|--------------------------|-----|------|-----|---------------|
|               | 1-3                      | 4-8 | 9-11 | >12 |               |
| <b>Titers</b> | 200                      | 100 | 0    | 0   | 0             |
|               | 200                      | 50  | 400  | 0   | 0             |
|               | 1600                     | 400 | 1600 | 0   | 0             |
|               | 400                      | 0   | 1600 | 25  | 25            |
|               | 1600                     | 25  | 800  | 0   | 0             |
|               | 3200                     | 200 | 400  | 0   | 0             |
|               | 1600                     | 400 | 400  | 0   | 0             |
|               | 50                       | 400 | 800  | 0   | 0             |
|               | 800                      | 100 | 0    | 50  | 50            |
|               | 200                      | 400 | 200  | 100 | 100           |
|               | 3200                     | 0   | 0    | 100 | 100           |
|               | 800                      | 200 | 200  | 50  | 50            |
|               | 400                      | 100 | 50   | 50  | 50            |
|               | 1600                     | 200 | 200  | 100 | 100           |
|               | 400                      | 200 | 100  | 50  | 50            |
|               | 200                      | 800 |      | 200 | 200           |
|               |                          | 50  |      | 0   | 0             |
|               |                          | 400 |      |     | 0             |
|               |                          | 25  |      |     | 50            |
|               |                          |     |      |     | 0             |
|               |                          |     |      | 0   |               |

| <b>One-Way ANOVA</b>                   |              |
|----------------------------------------|--------------|
| Table Analyzed                         | LF-D1 titers |
| <b>Kruskal-Wallis test</b>             |              |
| P value                                | < 0,0001     |
| Exact or approximate P value?          | Approximate  |
| P value summary                        | ****         |
| Do the medians vary signif. (P < 0.05) | Yes          |
| Number of groups                       | 5            |
| Kruskal-Wallis statistic               | 41,66        |
| <b>Data summary</b>                    |              |
| Number of treatments (columns)         | 5            |
| Number of values (total)               | 88           |

| <b>ANOVA Multiple Comparison</b>        |                        |                     |                        |           |           |
|-----------------------------------------|------------------------|---------------------|------------------------|-----------|-----------|
|                                         |                        |                     |                        |           |           |
| <b>Number of families</b>               | 1                      |                     |                        |           |           |
| <b>Number of comparisons per family</b> | 10                     |                     |                        |           |           |
| <b>Alpha</b>                            | 0,05                   |                     |                        |           |           |
|                                         |                        |                     |                        |           |           |
| <b>Dunn's multiple comparisons test</b> | <b>Mean rank diff,</b> | <b>Significant?</b> | <b>Summary</b>         |           |           |
|                                         |                        |                     |                        |           |           |
| <b>1-3 vs. 4-8</b>                      | 21,51                  | No                  | ns                     |           |           |
| <b>1-3 vs. 9-11</b>                     | 16,31                  | No                  | ns                     |           |           |
| <b>1-3 vs. &gt;12</b>                   | 44,08                  | Yes                 | ****                   |           |           |
| <b>1-3 vs. Nonvaccinated</b>            | 45,83                  | Yes                 | ****                   |           |           |
| <b>4-8 vs. 9-11</b>                     | -5,198                 | No                  | ns                     |           |           |
| <b>4-8 vs. &gt;12</b>                   | 22,57                  | No                  | ns                     |           |           |
| <b>4-8 vs. Nonvaccinated</b>            | 24,32                  | Yes                 | *                      |           |           |
| <b>9-11 vs. &gt;12</b>                  | 27,77                  | Yes                 | *                      |           |           |
| <b>9-11 vs. Nonvaccinated</b>           | 29,52                  | Yes                 | **                     |           |           |
| <b>&gt;12 vs. Nonvaccinated</b>         | 1,746                  | No                  | ns                     |           |           |
|                                         |                        |                     |                        |           |           |
|                                         |                        |                     |                        |           |           |
| <b>Test details</b>                     | <b>Mean rank 1</b>     | <b>Mean rank 2</b>  | <b>Mean rank diff,</b> | <b>n1</b> | <b>n2</b> |
|                                         |                        |                     |                        |           |           |
| <b>1-3 vs. 4-8</b>                      | 71,38                  | 49,87               | 21,51                  | 16        | 19        |
| <b>1-3 vs. 9-11</b>                     | 71,38                  | 55,07               | 16,31                  | 16        | 15        |
| <b>1-3 vs. &gt;12</b>                   | 71,38                  | 27,29               | 44,08                  | 16        | 17        |
| <b>1-3 vs. Nonvaccinated</b>            | 71,38                  | 25,55               | 45,83                  | 16        | 21        |
| <b>4-8 vs. 9-11</b>                     | 49,87                  | 55,07               | -5,198                 | 19        | 15        |
| <b>4-8 vs. &gt;12</b>                   | 49,87                  | 27,29               | 22,57                  | 19        | 17        |
| <b>4-8 vs. Nonvaccinated</b>            | 49,87                  | 25,55               | 24,32                  | 19        | 21        |
| <b>9-11 vs. &gt;12</b>                  | 55,07                  | 27,29               | 27,77                  | 15        | 17        |
| <b>9-11 vs. Nonvaccinated</b>           | 55,07                  | 25,55               | 29,52                  | 15        | 21        |
| <b>&gt;12 vs. Nonvaccinated</b>         | 27,29                  | 25,55               | 1,746                  | 17        | 21        |

| Descriptive Statistics |       |       |       |       |               |
|------------------------|-------|-------|-------|-------|---------------|
|                        | 1-3   | 4-8   | 9-11  | >12   | Nonvaccinated |
| Number of values       | 16    | 19    | 15    | 17    | 21            |
| Minimum                | 50    | 0     | 0     | 0     | 0             |
| 25% Percentile         | 200   | 50    | 50    | 0     | 0             |
| Median                 | 600   | 200   | 200   | 25    | 0             |
| 75% Percentile         | 1600  | 400   | 800   | 75    | 50            |
| Maximum                | 3200  | 800   | 1600  | 200   | 200           |
| Mean                   | 1028  | 213,2 | 450   | 42,65 | 36,9          |
| Std. Deviation         | 1024  | 207,2 | 532,8 | 55,74 | 52,21         |
| Std. Error of Mean     | 256   | 47,54 | 137,6 | 13,52 | 11,39         |
| Lower 95% CI           | 482,5 | 113,3 | 154,9 | 13,99 | 13,14         |
| Upper 95% CI           | 1574  | 313   | 745,1 | 71,3  | 60,67         |
| Mean ranks             | 71,38 | 49,87 | 55,07 | 27,29 | 25,55         |

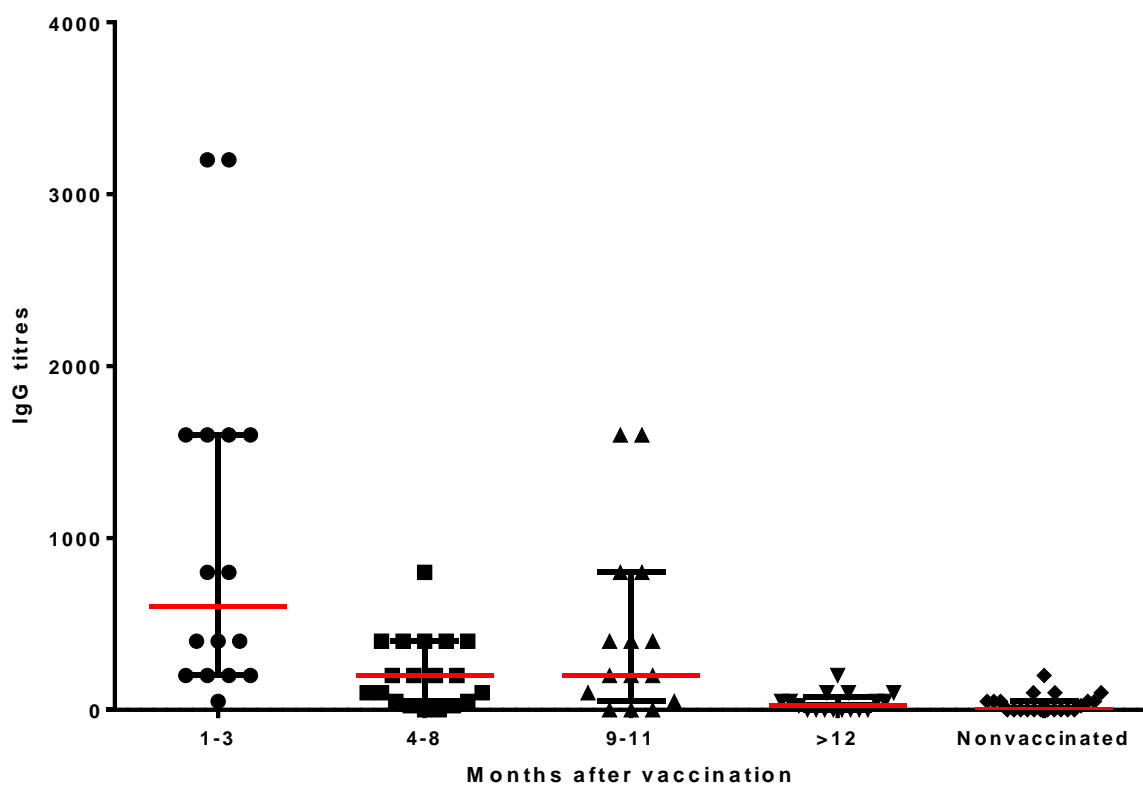

Supplement: pone.0260202.s023.pdf [file pone.0260202.s023.pdf]
