# Supplementary material for: Characterization of the adaptive immune response of donors receiving live anthrax vaccine
Source: PubMed Central journal article supplement (PMC8687594; doi:10.1371/journal.pone.0260202), 2021-12-20

## Level of specific IgG to LF-D2.3 of *B. anthracis* in the samples of blood serum from the donors.

The data are presented by a median titer with an interquartile range as a characteristic of the spread of values in the groups. The distribution was analysed using the Shapiro-Wilk test. The data were analysed using the Kruskal-Wallis test with multiple Dunn's comparisons in a One-Way ANOVA.

|               | Months after Vaccination |      |      |     | Nonvaccinated |
|---------------|--------------------------|------|------|-----|---------------|
|               | 1-3                      | 4-8  | 9-11 | >12 |               |
| <b>Titers</b> | 200                      | 400  | 0    | 0   | 50            |
|               | 400                      | 200  | 400  | 0   | 0             |
|               | 100                      | 50   | 400  | 0   | 0             |
|               | 400                      | 100  | 200  | 0   | 0             |
|               | 800                      | 200  | 400  | 0   | 0             |
|               | 800                      | 400  | 200  | 100 | 0             |
|               | 800                      | 100  | 400  | 0   | 0             |
|               | 3200                     | 800  | 50   | 0   | 0             |
|               | 800                      | 400  | 0    | 0   | 25            |
|               | 200                      | 400  | 100  | 400 | 0             |
|               | 800                      | 50   | 0    | 0   | 0             |
|               | 400                      | 200  | 25   | 0   | 0             |
|               | 200                      | 1600 | 0    | 0   | 0             |
|               | 100                      | 200  | 800  | 0   | 0             |
|               | 50                       | 0    | 50   | 0   | 0             |
|               | 100                      | 50   |      | 0   | 0             |
|               |                          | 100  |      | 0   | 0             |
|               |                          | 25   |      |     | 0             |
|               |                          | 0    |      |     | 0             |
|               |                          |      |      |     | 0             |
|               |                          |      |      | 0   |               |

| <b>One-Way ANOVA</b>                   |                |
|----------------------------------------|----------------|
| Table Analyzed                         | LF-D2.3 titers |
| <b>Kruskal-Wallis test</b>             |                |
| P value                                | < 0,0001       |
| Exact or approximate P value?          | Approximate    |
| P value summary                        | ****           |
| Do the medians vary signif. (P < 0.05) | Yes            |
| Number of groups                       | 5              |
| Kruskal-Wallis statistic               | 52,39          |
| <b>Data summary</b>                    |                |
| Number of treatments (columns)         | 5              |
| Number of values (total)               | 88             |

| <b>ANOVA Multiple Comparison</b>        |                        |                     |                        |           |           |
|-----------------------------------------|------------------------|---------------------|------------------------|-----------|-----------|
|                                         |                        |                     |                        |           |           |
| <b>Number of families</b>               | 1                      |                     |                        |           |           |
| <b>Number of comparisons per family</b> | 10                     |                     |                        |           |           |
| <b>Alpha</b>                            | 0,05                   |                     |                        |           |           |
|                                         |                        |                     |                        |           |           |
| <b>Dunn's multiple comparisons test</b> | <b>Mean rank diff,</b> | <b>Significant?</b> | <b>Summary</b>         |           |           |
|                                         |                        |                     |                        |           |           |
| <b>1-3 vs. 4-8</b>                      | 12,11                  | No                  | ns                     |           |           |
| <b>1-3 vs. 9-11</b>                     | 18,49                  | No                  | ns                     |           |           |
| <b>1-3 vs. &gt;12</b>                   | 44,57                  | Yes                 | ****                   |           |           |
| <b>1-3 vs. Nonvaccinated</b>            | 47,4                   | Yes                 | ****                   |           |           |
| <b>4-8 vs. 9-11</b>                     | 6,379                  | No                  | ns                     |           |           |
| <b>4-8 vs. &gt;12</b>                   | 32,46                  | Yes                 | ***                    |           |           |
| <b>4-8 vs. Nonvaccinated</b>            | 35,29                  | Yes                 | ****                   |           |           |
| <b>9-11 vs. &gt;12</b>                  | 26,08                  | Yes                 | *                      |           |           |
| <b>9-11 vs. Nonvaccinated</b>           | 28,91                  | Yes                 | **                     |           |           |
| <b>&gt;12 vs. Nonvaccinated</b>         | 2,832                  | No                  | ns                     |           |           |
|                                         |                        |                     |                        |           |           |
|                                         |                        |                     |                        |           |           |
| <b>Test details</b>                     | <b>Mean rank 1</b>     | <b>Mean rank 2</b>  | <b>Mean rank diff,</b> | <b>n1</b> | <b>n2</b> |
|                                         |                        |                     |                        |           |           |
| <b>1-3 vs. 4-8</b>                      | 70,19                  | 58,08               | 12,11                  | 16        | 19        |
| <b>1-3 vs. 9-11</b>                     | 70,19                  | 51,7                | 18,49                  | 16        | 15        |
| <b>1-3 vs. &gt;12</b>                   | 70,19                  | 25,62               | 44,57                  | 16        | 17        |
| <b>1-3 vs. Nonvaccinated</b>            | 70,19                  | 22,79               | 47,4                   | 16        | 21        |
| <b>4-8 vs. 9-11</b>                     | 58,08                  | 51,7                | 6,379                  | 19        | 15        |
| <b>4-8 vs. &gt;12</b>                   | 58,08                  | 25,62               | 32,46                  | 19        | 17        |
| <b>4-8 vs. Nonvaccinated</b>            | 58,08                  | 22,79               | 35,29                  | 19        | 21        |
| <b>9-11 vs. &gt;12</b>                  | 51,7                   | 25,62               | 26,08                  | 15        | 17        |
| <b>9-11 vs. Nonvaccinated</b>           | 51,7                   | 22,79               | 28,91                  | 15        | 21        |
| <b>&gt;12 vs. Nonvaccinated</b>         | 25,62                  | 22,79               | 2,832                  | 17        | 21        |

| Descriptive Statistics |       |       |       |        |               |
|------------------------|-------|-------|-------|--------|---------------|
|                        | 1-3   | 4-8   | 9-11  | >12    | Nonvaccinated |
| Number of values       | 16    | 19    | 15    | 17     | 21            |
| Minimum                | 50    | 0     | 0     | 0      | 0             |
| 25% Percentile         | 125   | 50    | 0     | 0      | 0             |
| Median                 | 400   | 200   | 100   | 0      | 0             |
| 75% Percentile         | 800   | 400   | 400   | 0      | 0             |
| Maximum                | 3200  | 1600  | 800   | 400    | 50            |
| Mean                   | 584,4 | 277,6 | 201,7 | 29,41  | 3,571         |
| Std. Deviation         | 757,6 | 378,1 | 233,8 | 98,52  | 11,95         |
| Std. Error of Mean     | 189,4 | 86,75 | 60,38 | 23,89  | 2,608         |
| Lower 95% CI           | 180,7 | 95,38 | 72,17 | -21,24 | -1,869        |
| Upper 95% CI           | 988,1 | 459,9 | 331,2 | 80,07  | 9,012         |
| Mean ranks             | 70,19 | 58,08 | 51,7  | 25,62  | 22,79         |

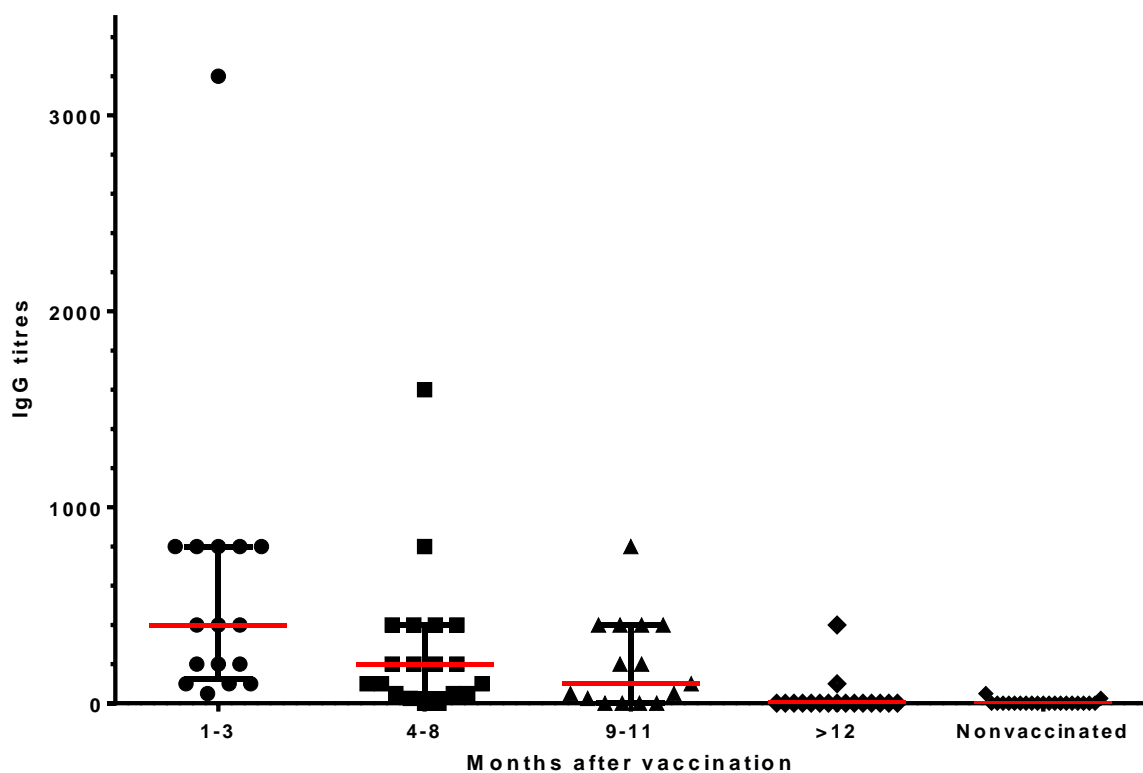

Supplement: pone.0260202.s024.pdf [file pone.0260202.s024.pdf]
