# Supplementary material for: Characterization of the adaptive immune response of donors receiving live anthrax vaccine
Source: PubMed Central journal article supplement (PMC8687594; doi:10.1371/journal.pone.0260202), 2021-12-20

## Level of specific IgG to LF-D4 of *B. anthracis* in the samples of blood serum from the donors.

The data are presented by a median titer with an interquartile range as a characteristic of the spread of values in the groups. The distribution was analysed using the Shapiro-Wilk test. The data were analysed using the Kruskal-Wallis test with multiple Dunn's comparisons in a One-Way ANOVA.

|               | Months after Vaccination |     |      |     | Nonvaccinated |
|---------------|--------------------------|-----|------|-----|---------------|
|               | 1-3                      | 4-8 | 9-11 | >12 |               |
| <b>Titers</b> | 400                      | 400 | 0    | 0   | 0             |
|               | 800                      | 25  | 400  | 0   | 0             |
|               | 1600                     | 50  | 800  | 50  | 0             |
|               | 800                      | 25  | 200  | 0   | 0             |
|               | 1600                     | 200 | 400  | 0   | 25            |
|               | 3200                     | 400 | 800  | 50  | 0             |
|               | 1600                     | 200 | 400  | 0   | 100           |
|               | 3200                     | 400 | 400  | 0   | 50            |
|               | 800                      | 400 | 0    | 0   | 0             |
|               | 400                      | 200 | 100  | 400 | 25            |
|               | 800                      | 50  | 0    | 0   | 0             |
|               | 400                      | 200 | 50   | 0   | 0             |
|               | 200                      | 800 | 100  | 0   | 0             |
|               | 100                      | 25  | 800  | 0   | 0             |
|               | 800                      | 200 | 200  | 25  | 0             |
|               | 200                      | 400 |      | 25  | 0             |
|               |                          | 200 |      | 0   | 0             |
|               |                          | 0   |      |     | 0             |
|               | 25                       |     |      | 50  |               |
|               |                          |     |      | 0   |               |
|               |                          |     |      | 0   |               |

| <b>One-Way ANOVA</b>                   |              |
|----------------------------------------|--------------|
| Table Analyzed                         | LF-D4 titers |
| <b>Kruskal-Wallis test</b>             |              |
| P value                                | < 0,0001     |
| Exact or approximate P value?          | Approximate  |
| P value summary                        | ****         |
| Do the medians vary signif. (P < 0.05) | Yes          |
| Number of groups                       | 5            |
| Kruskal-Wallis statistic               | 54,6         |
| <b>Data summary</b>                    |              |
| Number of treatments (columns)         | 5            |
| Number of values (total)               | 88           |

| <b>ANOVA Multiple Comparison</b>        |                        |                     |                        |           |           |
|-----------------------------------------|------------------------|---------------------|------------------------|-----------|-----------|
|                                         |                        |                     |                        |           |           |
| <b>Number of families</b>               | 1                      |                     |                        |           |           |
| <b>Number of comparisons per family</b> | 10                     |                     |                        |           |           |
| <b>Alpha</b>                            | 0,05                   |                     |                        |           |           |
|                                         |                        |                     |                        |           |           |
| <b>Dunn's multiple comparisons test</b> | <b>Mean rank diff,</b> | <b>Significant?</b> | <b>Summary</b>         |           |           |
|                                         |                        |                     |                        |           |           |
| <b>1-3 vs. 4-8</b>                      | 21,39                  | No                  | ns                     |           |           |
| <b>1-3 vs. 9-11</b>                     | 20,17                  | No                  | ns                     |           |           |
| <b>1-3 vs. &gt;12</b>                   | 49,35                  | Yes                 | ****                   |           |           |
| <b>1-3 vs. Nonvaccinated</b>            | 51,87                  | Yes                 | ****                   |           |           |
| <b>4-8 vs. 9-11</b>                     | -1,221                 | No                  | ns                     |           |           |
| <b>4-8 vs. &gt;12</b>                   | 27,96                  | Yes                 | **                     |           |           |
| <b>4-8 vs. Nonvaccinated</b>            | 30,48                  | Yes                 | **                     |           |           |
| <b>9-11 vs. &gt;12</b>                  | 29,18                  | Yes                 | **                     |           |           |
| <b>9-11 vs. Nonvaccinated</b>           | 31,7                   | Yes                 | **                     |           |           |
| <b>&gt;12 vs. Nonvaccinated</b>         | 2,522                  | No                  | ns                     |           |           |
|                                         |                        |                     |                        |           |           |
|                                         |                        |                     |                        |           |           |
| <b>Test details</b>                     | <b>Mean rank 1</b>     | <b>Mean rank 2</b>  | <b>Mean rank diff,</b> | <b>n1</b> | <b>n2</b> |
|                                         |                        |                     |                        |           |           |
| <b>1-3 vs. 4-8</b>                      | 74,47                  | 53,08               | 21,39                  | 16        | 19        |
| <b>1-3 vs. 9-11</b>                     | 74,47                  | 54,3                | 20,17                  | 16        | 15        |
| <b>1-3 vs. &gt;12</b>                   | 74,47                  | 25,12               | 49,35                  | 16        | 17        |
| <b>1-3 vs. Nonvaccinated</b>            | 74,47                  | 22,6                | 51,87                  | 16        | 21        |
| <b>4-8 vs. 9-11</b>                     | 53,08                  | 54,3                | -1,221                 | 19        | 15        |
| <b>4-8 vs. &gt;12</b>                   | 53,08                  | 25,12               | 27,96                  | 19        | 17        |
| <b>4-8 vs. Nonvaccinated</b>            | 53,08                  | 22,6                | 30,48                  | 19        | 21        |
| <b>9-11 vs. &gt;12</b>                  | 54,3                   | 25,12               | 29,18                  | 15        | 17        |
| <b>9-11 vs. Nonvaccinated</b>           | 54,3                   | 22,6                | 31,7                   | 15        | 21        |
| <b>&gt;12 vs. Nonvaccinated</b>         | 25,12                  | 22,6                | 2,522                  | 17        | 21        |

| Descriptive Statistics |       |       |       |        |               |
|------------------------|-------|-------|-------|--------|---------------|
|                        | 1-3   | 4-8   | 9-11  | >12    | Nonvaccinated |
| Number of values       | 16    | 19    | 15    | 17     | 21            |
| Minimum                | 100   | 0     | 0     | 0      | 0             |
| 25% Percentile         | 400   | 25    | 50    | 0      | 0             |
| Median                 | 800   | 200   | 200   | 0      | 0             |
| 75% Percentile         | 1600  | 400   | 400   | 25     | 12,5          |
| Maximum                | 3200  | 800   | 800   | 400    | 100           |
| Mean                   | 1056  | 221,1 | 310   | 32,35  | 11,9          |
| Std. Deviation         | 968,8 | 205,4 | 295,3 | 96,32  | 25,76         |
| Std. Error of Mean     | 242,2 | 47,11 | 76,25 | 23,36  | 5,622         |
| Lower 95% CI           | 540   | 122,1 | 146,5 | -17,17 | 0,1779        |
| Upper 95% CI           | 1572  | 320   | 473,5 | 81,88  | 23,63         |
| Mean ranks             | 74,47 | 53,08 | 54,3  | 25,12  | 22,6          |

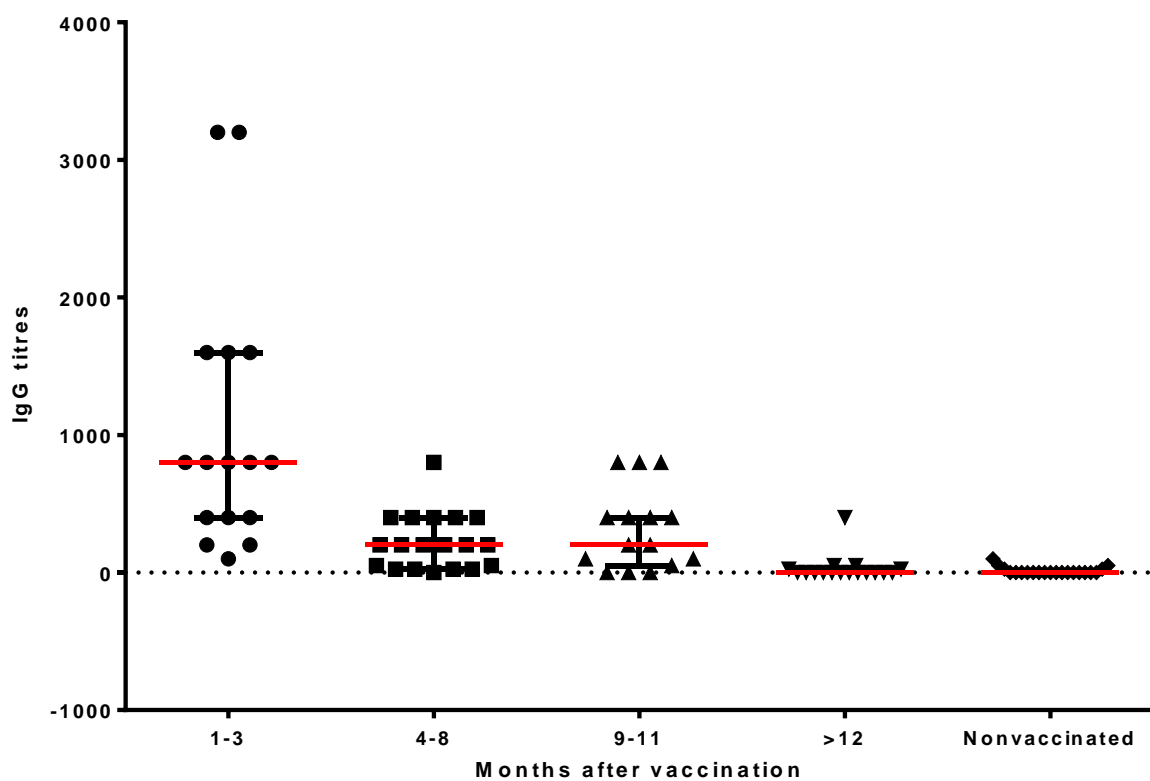

Supplement: pone.0260202.s025.pdf [file pone.0260202.s025.pdf]
