# Supplementary material for: Characterization of the adaptive immune response of donors receiving live anthrax vaccine
Source: PubMed Central journal article supplement (PMC8687594; doi:10.1371/journal.pone.0260202), 2021-12-20

## Toxin-neutralizing activity of the samples of blood serum (dilution 1:25) from the donors vaccinated against anthrax.

The data were analysed using the Kruskal-Wallis test with multiple Dunn comparisons in a One-Way ANOVA.

|                     | Months after Vaccination |          |          |          | Nonvaccinated |
|---------------------|--------------------------|----------|----------|----------|---------------|
|                     | 1-3                      | 4-8      | 9-11     | >12      |               |
| <b>Viability, %</b> | 31,8346                  | 20,84245 | 12,39132 | 27,67199 | 22,5884       |
|                     | 40,6576                  | 26,864   | 38,8331  | 69,54984 | 13,64473      |
|                     | 39,43994                 | 65,92554 | 40,8815  | 39,84637 | 7,89494       |
|                     | 48,82295                 | 19,5403  | 26,1954  | 42,84774 | 11,95774      |
|                     | 59,92215                 | 42,8114  | 78,75529 | 29,2283  | 16,8835       |
|                     | 50,8534                  | 38,84354 | 43,8687  | 25,94855 | 12,5392       |
|                     | 51,34198                 | 39,84127 | 36,83326 | 25,9164  | 9,47738       |
|                     | 43,81223                 | 45,01134 | 16,9336  | 30,74883 | 13,88594      |
|                     | 53,91235                 | 42,41965 | 14,038   | 11,83366 | 20,9758       |
|                     | 72,9756                  | 29,92754 | 50,69034 | 57,8392  | 11,85338      |
|                     | 69,9372                  | 23,3112  | 37,26688 | 25,564   | 6,9327        |
|                     | 30,19446                 | 34,83672 | 40,61093 | 47,55232 | 9,833217      |
|                     | 27,84848                 | 52,53543 | 29,16399 | 20,8193  | 13,74366      |
|                     | 22,82199                 | 16,73286 | 41,73322 | 26,44944 | 15,6362       |
|                     | 43,9553                  | 37,12018 | 56,61332 | 5,277291 | 6,8291        |
|                     | 37,28819                 | 50,9942  |          | 29,93515 | 8,9672        |
|                     |                          | 34,4423  |          | 13,53023 | 16,6483       |
|                     |                          | 18,95376 |          |          | 11,81109      |
|                     |                          | 33,38234 |          |          | 12,082        |
|                     |                          |          |          | 10,6428  |               |
|                     |                          |          |          | 8,88675  |               |

| <b>One-Way ANOVA</b>                   |                    |
|----------------------------------------|--------------------|
| Table Analyzed                         | TNA for all donors |
|                                        |                    |
| <b>Kruskal-Wallis test</b>             |                    |
| P value                                | < 0,0001           |
| Exact or approximate P value?          | Approximate        |
| P value summary                        | ****               |
| Do the medians vary signif. (P < 0.05) | Yes                |
| Number of groups                       | 5                  |
| Kruskal-Wallis statistic               | 44,64              |
|                                        |                    |
| Data summary                           |                    |
| Number of treatments (columns)         | 5                  |
| Number of values (total)               | 88                 |

| <b>ANOVA Multiple Comparison</b>        |                        |                     |                        |           |           |
|-----------------------------------------|------------------------|---------------------|------------------------|-----------|-----------|
|                                         |                        |                     |                        |           |           |
| <b>Number of families</b>               | 1                      |                     |                        |           |           |
| <b>Number of comparisons per family</b> | 10                     |                     |                        |           |           |
| <b>Alpha</b>                            | 0,05                   |                     |                        |           |           |
|                                         |                        |                     |                        |           |           |
| <b>Dunn's multiple comparisons test</b> | <b>Mean rank diff,</b> | <b>Significant?</b> | <b>Summary</b>         |           |           |
|                                         |                        |                     |                        |           |           |
| <b>1-3 vs. 4-8</b>                      | 13,29                  | No                  | ns                     |           |           |
| <b>1-3 vs. 9-11</b>                     | 11,61                  | No                  | ns                     |           |           |
| <b>1-3 vs. &gt;12</b>                   | 21,52                  | No                  | ns                     |           |           |
| <b>1-3 vs. Nonvaccinated</b>            | 51,57                  | Yes                 | ****                   |           |           |
| <b>4-8 vs. 9-11</b>                     | -1,674                 | No                  | ns                     |           |           |
| <b>4-8 vs. &gt;12</b>                   | 8,232                  | No                  | ns                     |           |           |
| <b>4-8 vs. Nonvaccinated</b>            | 38,29                  | Yes                 | ****                   |           |           |
| <b>9-11 vs. &gt;12</b>                  | 9,906                  | No                  | ns                     |           |           |
| <b>9-11 vs. Nonvaccinated</b>           | 39,96                  | Yes                 | ****                   |           |           |
| <b>&gt;12 vs. Nonvaccinated</b>         | 30,06                  | Yes                 | **                     |           |           |
|                                         |                        |                     |                        |           |           |
|                                         |                        |                     |                        |           |           |
| <b>Test details</b>                     | <b>Mean rank 1</b>     | <b>Mean rank 2</b>  | <b>Mean rank diff,</b> | <b>n1</b> | <b>n2</b> |
|                                         |                        |                     |                        |           |           |
| <b>1-3 vs. 4-8</b>                      | 65,81                  | 52,53               | 13,29                  | 16        | 19        |
| <b>1-3 vs. 9-11</b>                     | 65,81                  | 54,2                | 11,61                  | 16        | 15        |
| <b>1-3 vs. &gt;12</b>                   | 65,81                  | 44,29               | 21,52                  | 16        | 17        |
| <b>1-3 vs. Nonvaccinated</b>            | 65,81                  | 14,24               | 51,57                  | 16        | 21        |
| <b>4-8 vs. 9-11</b>                     | 52,53                  | 54,2                | -1,674                 | 19        | 15        |
| <b>4-8 vs. &gt;12</b>                   | 52,53                  | 44,29               | 8,232                  | 19        | 17        |
| <b>4-8 vs. Nonvaccinated</b>            | 52,53                  | 14,24               | 38,29                  | 19        | 21        |
| <b>9-11 vs. &gt;12</b>                  | 54,2                   | 44,29               | 9,906                  | 15        | 17        |
| <b>9-11 vs. Nonvaccinated</b>           | 54,2                   | 14,24               | 39,96                  | 15        | 21        |
| <b>&gt;12 vs. Nonvaccinated</b>         | 44,29                  | 14,24               | 30,06                  | 17        | 21        |

| Descriptive Statistics |       |       |       |       |               |
|------------------------|-------|-------|-------|-------|---------------|
|                        | 1-3   | 4-8   | 9-11  | >12   | Nonvaccinated |
| Number of values       | 16    | 19    | 15    | 17    | 21            |
| Minimum                | 22,82 | 16,73 | 12,39 | 5,277 | 6,829         |
| 25% Percentile         | 33,2  | 23,31 | 26,2  | 23,19 | 9,222         |
| Median                 | 43,88 | 34,84 | 38,83 | 27,67 | 11,96         |
| 75% Percentile         | 53,27 | 42,81 | 43,87 | 41,35 | 14,76         |
| Maximum                | 72,98 | 65,93 | 78,76 | 69,55 | 22,59         |
| Mean                   | 45,35 | 35,49 | 37,65 | 31,21 | 12,56         |
| Std. Deviation         | 14,34 | 12,99 | 17,16 | 16,3  | 4,216         |
| Std. Error of Mean     | 3,585 | 2,98  | 4,431 | 3,954 | 0,9201        |
| Lower 95% CI           | 37,71 | 29,23 | 28,15 | 22,83 | 10,64         |
| Upper 95% CI           | 52,99 | 41,75 | 47,16 | 39,59 | 14,48         |
| Mean ranks             | 65,81 | 52,53 | 54,2  | 44,29 | 14,24         |

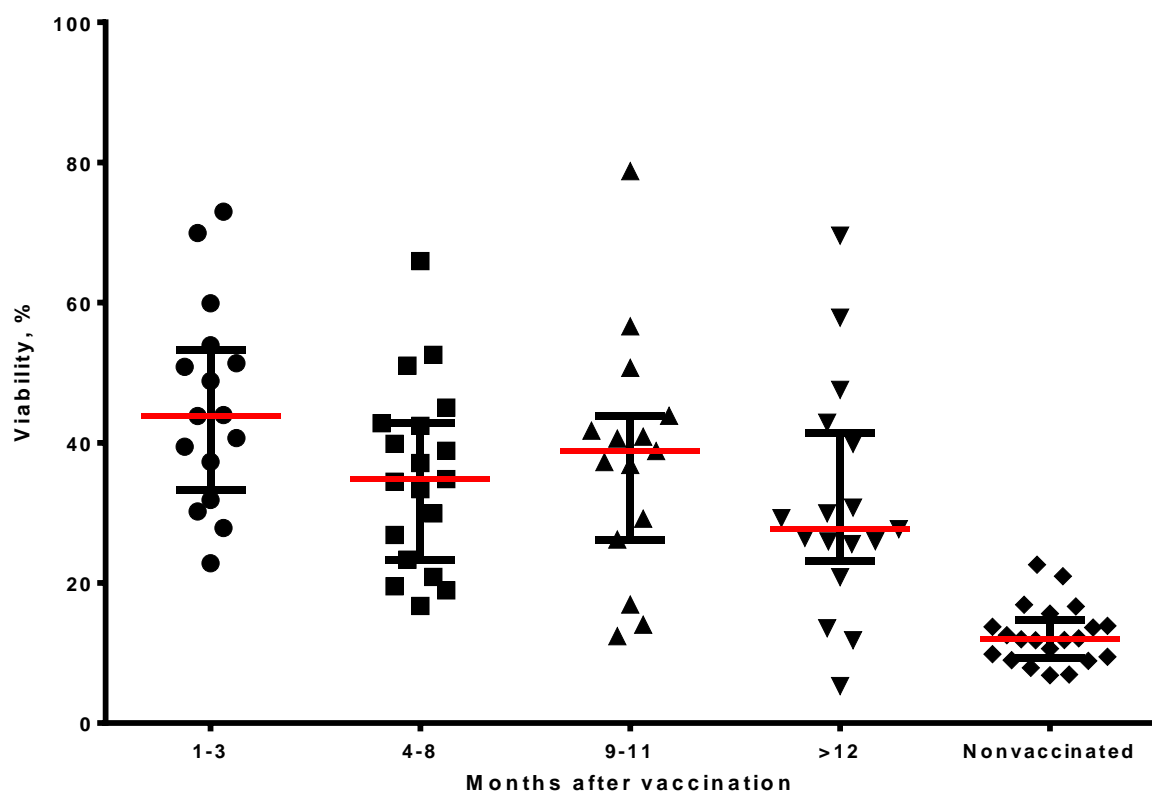

Supplement: pone.0260202.s026.pdf [file pone.0260202.s026.pdf]
