# Supplementary material for: Characterization of the adaptive immune response of donors receiving live anthrax vaccine
Source: PubMed Central journal article supplement (PMC8687594; doi:10.1371/journal.pone.0260202), 2021-12-20

## Correlation analysis between the toxin-neutralizing activity of the samples of blood serum from the donors and antibody titers against PA.

The data were analysed using the Spearman's rank correlation coefficient.

| <b>XY Data</b> |                          |
|----------------|--------------------------|
| <b>TNA</b>     | <b>Titers against PA</b> |
| 31,834600      | 200                      |
| 40,657600      | 800                      |
| 39,439940      | 100                      |
| 48,822950      | 800                      |
| 59,922150      | 800                      |
| 50,853400      | 100                      |
| 51,341980      | 1600                     |
| 43,812230      | 1600                     |
| 53,912350      | 800                      |
| 72,975600      | 800                      |
| 69,937200      | 400                      |
| 30,194460      | 100                      |
| 27,848480      | 800                      |
| 22,821990      | 800                      |
| 43,955300      | 400                      |
| 37,288190      | 400                      |
| 20,842450      | 800                      |
| 26,864000      | 400                      |
| 65,925540      | 400                      |
| 19,540300      | 100                      |
| 42,811400      | 0                        |
| 38,843540      | 25                       |
| 39,841270      | 400                      |
| 45,011340      | 800                      |
| 42,419650      | 400                      |
| 29,927540      | 25                       |
| 23,311200      | 100                      |
| 34,836720      | 25                       |
| 52,535430      | 50                       |
| 16,732860      | 100                      |
| 37,120180      | 25                       |
| 50,994200      | 400                      |
| 34,442300      | 0                        |
| 18,953760      | 100                      |
| 33,382340      | 100                      |

| <b>XY Data</b> |                          |
|----------------|--------------------------|
| <b>TNA</b>     | <b>Titers against PA</b> |
| 12,391320      | 0                        |
| 38,833100      | 400                      |
| 40,881500      | 50                       |
| 26,195400      | 100                      |
| 78,755290      | 1600                     |
| 43,868700      | 200                      |
| 36,833260      | 200                      |
| 16,933600      | 100                      |
| 14,038000      | 0                        |
| 50,690340      | 50                       |
| 37,266880      | 50                       |
| 40,610930      | 25                       |
| 29,163990      | 100                      |
| 41,733220      | 400                      |
| 56,613320      | 200                      |
| 27,671990      | 50                       |
| 69,549840      | 25                       |
| 39,846370      | 100                      |
| 42,847740      | 100                      |
| 29,228300      | 100                      |
| 25,948550      | 200                      |
| 25,916400      | 100                      |
| 30,748830      | 50                       |
| 11,833660      | 50                       |
| 57,839200      | 400                      |
| 25,564000      | 25                       |
| 47,552320      | 200                      |
| 20,819300      | 0                        |
| 26,449440      | 0                        |
| 5,277291       | 0                        |
| 29,935150      | 25                       |
| 13,530230      | 100                      |
|                |                          |
|                |                          |
|                |                          |

| <b>Correlation. Tabular results</b> |                                  |
|-------------------------------------|----------------------------------|
|                                     | <b>TNA vs. Titers against PA</b> |
| <b>Spearman r</b>                   |                                  |
| <b>r</b>                            | 0,4455                           |
| 95% confidence interval             | 0,2230 to 0,6239                 |
| <b>P value</b>                      |                                  |
| P (two-tailed)                      | 0,0002                           |
| P value summary                     | ***                              |
| Exact or approximate P value?       | Approximate                      |
| Significant? (alpha = 0.05)         | Yes                              |
| <b>Number of XY Pairs</b>           |                                  |
|                                     | 67                               |

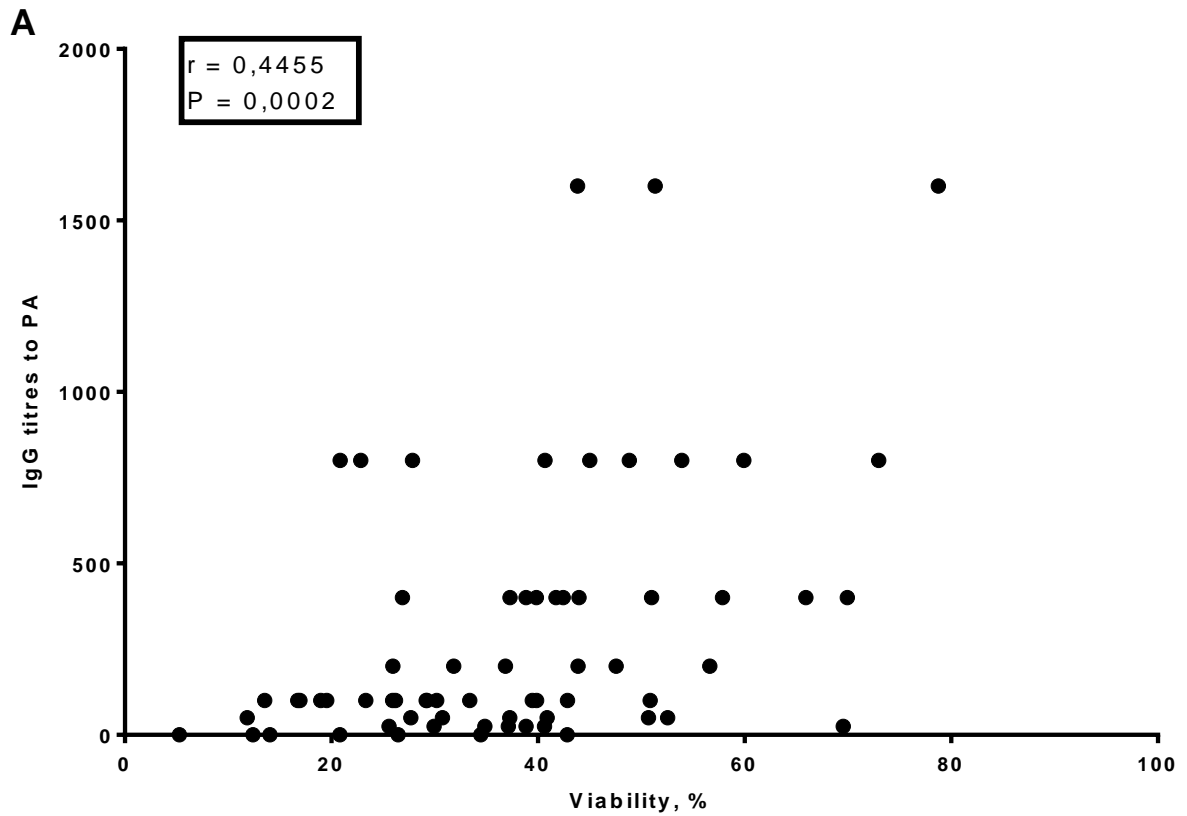

Supplement: pone.0260202.s027.pdf [file pone.0260202.s027.pdf]
