# Supplementary material for: Characterization of the adaptive immune response of donors receiving live anthrax vaccine
Source: PubMed Central journal article supplement (PMC8687594; doi:10.1371/journal.pone.0260202), 2021-12-20

## **Correlation analysis between the toxin-neutralizing activity of the samples of blood serum from the donors and antibody titers against LF.**

The data were analysed using the Spearman's rank correlation coefficient.

| <b>XY Data</b> |                          |
|----------------|--------------------------|
| <b>TNA</b>     | <b>Titers against LF</b> |
| 31,8346        | 200                      |
| 40,6576        | 800                      |
| 39,43994       | 400                      |
| 48,82295       | 100                      |
| 59,92215       | 400                      |
| 50,8534        | 200                      |
| 51,34198       | 800                      |
| 43,81223       | 800                      |
| 53,91235       | 400                      |
| 72,9756        | 800                      |
| 69,9372        | 800                      |
| 30,19446       | 400                      |
| 27,84848       | 100                      |
| 22,82199       | 50                       |
| 43,9553        | 400                      |
| 37,28819       | 400                      |
| 20,84245       | 100                      |
| 26,864         | 100                      |
| 65,92554       | 200                      |
| 19,5403        | 25                       |
| 42,8114        | 400                      |
| 38,84354       | 1600                     |
| 39,84127       | 400                      |
| 45,01134       | 800                      |
| 42,41965       | 400                      |
| 29,92754       | 800                      |
| 23,3112        | 25                       |
| 34,83672       | 25                       |
| 52,53543       | 25                       |
| 16,73286       | 100                      |
| 37,12018       | 100                      |
| 50,9942        | 400                      |
| 34,4423        | 25                       |
| 18,95376       | 100                      |
| 33,38234       | 25                       |

| <b>XY Data</b> |                          |
|----------------|--------------------------|
| <b>TNA</b>     | <b>Titers against LF</b> |
| 12,39132       | 0                        |
| 38,8331        | 400                      |
| 40,8815        | 400                      |
| 26,1954        | 200                      |
| 78,75529       | 800                      |
| 43,8687        | 100                      |
| 36,83326       | 200                      |
| 16,9336        | 100                      |
| 14,038         | 0                        |
| 50,69034       | 100                      |
| 37,26688       | 0                        |
| 40,61093       | 25                       |
| 29,16399       | 25                       |
| 41,73322       | 200                      |
| 56,61332       | 100                      |
| 27,67199       | 0                        |
| 69,54984       | 0                        |
| 39,84637       | 0                        |
| 42,84774       | 25                       |
| 29,2283        | 0                        |
| 25,94855       | 200                      |
| 25,9164        | 0                        |
| 30,74883       | 0                        |
| 11,83366       | 0                        |
| 57,8392        | 200                      |
| 25,564         | 50                       |
| 47,55232       | 0                        |
| 20,8193        | 25                       |
| 26,44944       | 25                       |
| 5,277291       | 50                       |
| 29,93515       | 25                       |
| 13,53023       | 0                        |
|                |                          |
|                |                          |
|                |                          |

| <b>Correlation. Tabular results</b> |                                  |
|-------------------------------------|----------------------------------|
|                                     | <b>TNA vs. Titers against LF</b> |
| <b>Spearman r</b>                   |                                  |
| <b>r</b>                            | 0,4902                           |
| 95% confidence interval             | 0,2766 to 0,6576                 |
| <b>P value</b>                      |                                  |
| P (two-tailed)                      | < 0,0001                         |
| P value summary                     | ****                             |
| Exact or approximate P value?       | Approximate                      |
| Significant? (alpha = 0.05)         | Yes                              |
|                                     |                                  |
| Number of XY Pairs                  | 67                               |

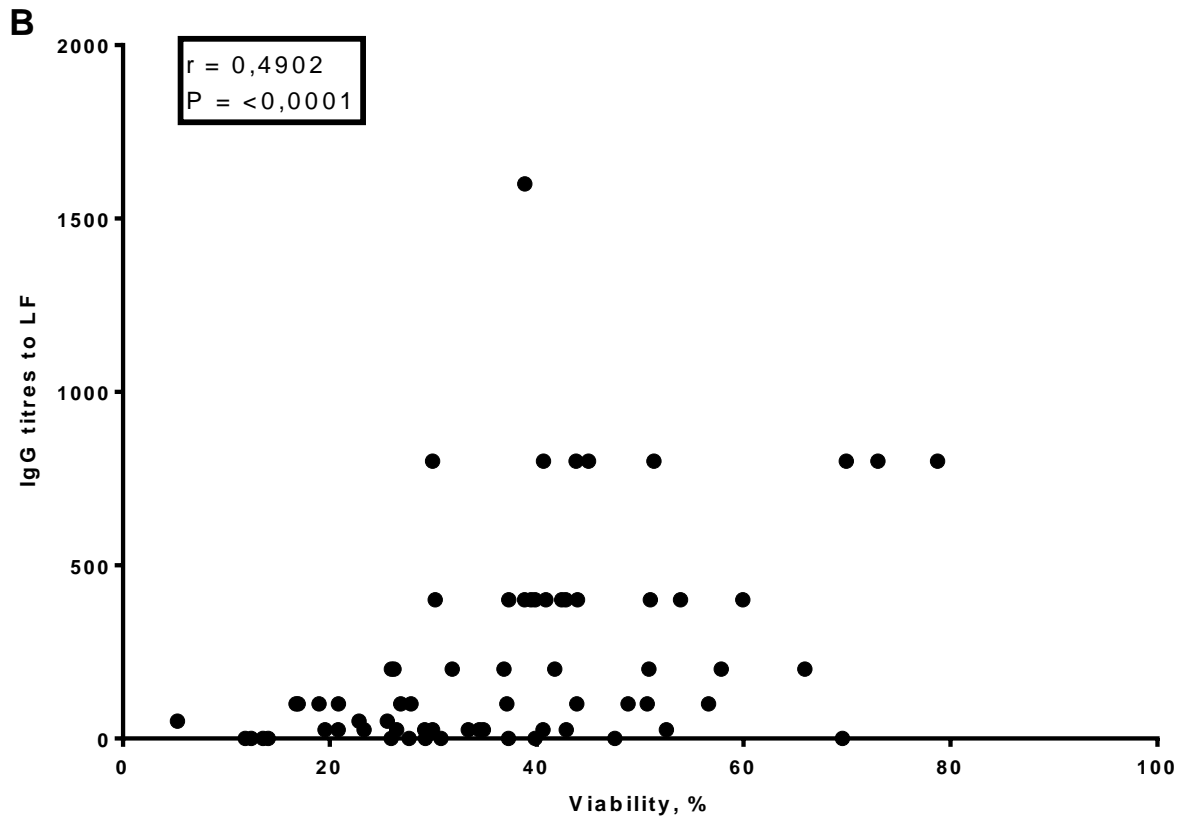

Supplement: pone.0260202.s028.pdf [file pone.0260202.s028.pdf]
