# Supplementary material for: Characterization of the adaptive immune response of donors receiving live anthrax vaccine
Source: PubMed Central journal article supplement (PMC8687594; doi:10.1371/journal.pone.0260202), 2021-12-20

## **Correlation analysis between the toxin-neutralizing activity of the samples of blood serum from the donors and antibody titers against LF domains.**

The data were analysed using the Spearman's rank correlation coefficient.

| <b>XY Data</b> |                             |                               |                             |
|----------------|-----------------------------|-------------------------------|-----------------------------|
| <b>TNA</b>     | <b>Titers against LF-D1</b> | <b>Titers against LF-D2.3</b> | <b>Titers against LF-D4</b> |
| 31,8346        | 200                         | 200                           | 400                         |
| 40,6576        | 200                         | 400                           | 800                         |
| 39,43994       | 1600                        | 100                           | 1600                        |
| 48,82295       | 400                         | 400                           | 800                         |
| 59,92215       | 1600                        | 800                           | 1600                        |
| 50,8534        | 3200                        | 800                           | 3200                        |
| 51,34198       | 1600                        | 800                           | 1600                        |
| 43,81223       | 50                          | 3200                          | 3200                        |
| 53,91235       | 800                         | 800                           | 800                         |
| 72,9756        | 200                         | 200                           | 400                         |
| 69,9372        | 3200                        | 800                           | 800                         |
| 30,19446       | 800                         | 400                           | 400                         |
| 27,84848       | 400                         | 200                           | 200                         |
| 22,82199       | 1600                        | 100                           | 100                         |
| 43,9553        | 400                         | 50                            | 800                         |
| 37,28819       | 200                         | 100                           | 200                         |
| 20,84245       | 100                         | 400                           | 400                         |
| 26,864         | 50                          | 200                           | 25                          |
| 65,92554       | 400                         | 50                            | 50                          |
| 19,5403        | 0                           | 100                           | 25                          |
| 42,8114        | 25                          | 200                           | 200                         |
| 38,84354       | 200                         | 400                           | 400                         |
| 39,84127       | 400                         | 100                           | 200                         |
| 45,01134       | 400                         | 800                           | 400                         |
| 42,41965       | 100                         | 400                           | 400                         |
| 29,92754       | 400                         | 400                           | 200                         |
| 23,3112        | 0                           | 50                            | 50                          |
| 34,83672       | 200                         | 200                           | 200                         |
| 52,53543       | 100                         | 1600                          | 800                         |
| 16,73286       | 200                         | 200                           | 25                          |
| 37,12018       | 200                         | 0                             | 200                         |
| 50,9942        | 800                         | 50                            | 400                         |
| 34,4423        | 50                          | 100                           | 200                         |
| 18,95376       | 400                         | 25                            | 0                           |
| 33,38234       | 25                          | 0                             | 25                          |
| 12,39132       | 0                           | 0                             | 0                           |
| 38,8331        | 400                         | 400                           | 400                         |
| 40,8815        | 1600                        | 400                           | 800                         |

| <b>XY Data</b> |                             |                               |                             |
|----------------|-----------------------------|-------------------------------|-----------------------------|
| <b>TNA</b>     | <b>Titers against LF-D1</b> | <b>Titers against LF-D2.3</b> | <b>Titers against LF-D4</b> |
| 78,75529       | 800                         | 400                           | 400                         |
| 43,8687        | 400                         | 200                           | 800                         |
| 36,83326       | 400                         | 400                           | 400                         |
| 16,9336        | 800                         | 50                            | 400                         |
| 14,038         | 0                           | 0                             | 0                           |
| 50,69034       | 200                         | 100                           | 100                         |
| 37,26688       | 0                           | 0                             | 0                           |
| 40,61093       | 200                         | 25                            | 50                          |
| 29,16399       | 50                          | 0                             | 100                         |
| 41,73322       | 200                         | 800                           | 800                         |
| 56,61332       | 100                         | 50                            | 200                         |
| 27,67199       | 0                           | 0                             | 0                           |
| 69,54984       | 0                           | 0                             | 0                           |
| 39,84637       | 0                           | 0                             | 50                          |
| 42,84774       | 25                          | 0                             | 0                           |
| 29,2283        | 0                           | 0                             | 0                           |
| 25,94855       | 0                           | 100                           | 50                          |
| 25,9164        | 0                           | 0                             | 0                           |
| 30,74883       | 0                           | 0                             | 0                           |
| 11,83366       | 50                          | 0                             | 0                           |
| 57,8392        | 100                         | 400                           | 400                         |
| 25,564         | 100                         | 0                             | 0                           |
| 47,55232       | 50                          | 0                             | 0                           |
| 20,8193        | 50                          | 0                             | 0                           |
| 26,44944       | 100                         | 0                             | 0                           |
| 5,277291       | 50                          | 0                             | 25                          |
| 29,93515       | 200                         | 0                             | 25                          |
| 13,53023       | 0                           | 0                             | 0                           |

| <b>Correlation. Tabular results</b> |                                     |                                       |                                     |
|-------------------------------------|-------------------------------------|---------------------------------------|-------------------------------------|
|                                     | <b>TNA vs. Titers against LF-D1</b> | <b>TNA vs. Titers against LF-D2.3</b> | <b>TNA vs. Titers against LF-D4</b> |
| <b>Spearman r</b>                   |                                     |                                       |                                     |
| <b>r</b>                            | 0,3846                              | 0,4796                                | 0,5813                              |
| 95% confidence interval             | 0,1519 to 0,5769                    | 0,2638 to 0,6497                      | 0,3903 to 0,7243                    |
| <b>P value</b>                      |                                     |                                       |                                     |
| P (two-tailed)                      | 0,0013                              | < 0,0001                              | < 0,0001                            |
| P value summary                     | **                                  | ****                                  | ****                                |
| Exact or approximate P value?       | Approximate                         | Approximate                           | Approximate                         |
| Significant? (alpha = 0.05)         | Yes                                 | Yes                                   | Yes                                 |
| <b>Number of XY Pairs</b>           |                                     |                                       |                                     |
|                                     | 67                                  | 67                                    | 67                                  |

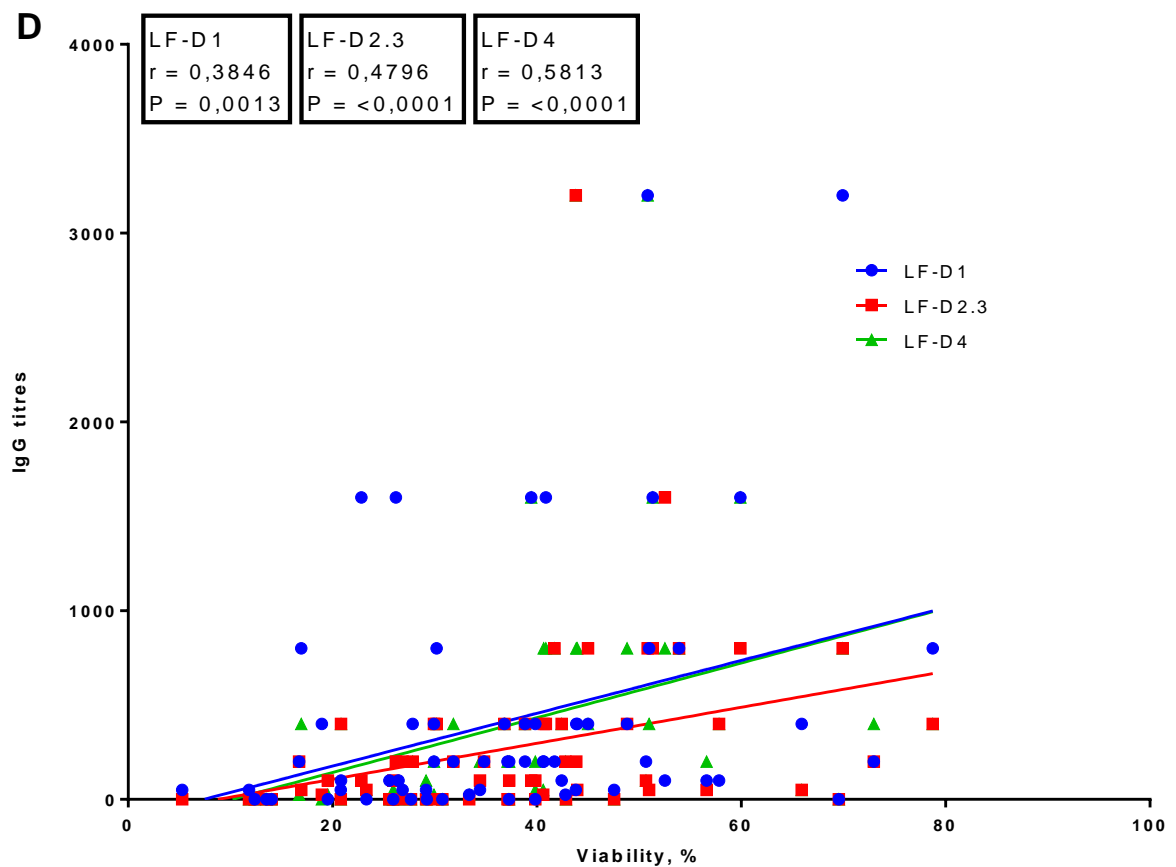

Supplement: pone.0260202.s030.pdf [file pone.0260202.s030.pdf]
