# Supplementary material for: Characterization of the adaptive immune response of donors receiving live anthrax vaccine
Source: PubMed Central journal article supplement (PMC8687594; doi:10.1371/journal.pone.0260202), 2021-12-20

## Analysis of the effect of age on the development and duration of anti-anthrax post-vaccination immunity (Age vs. PA titers).

Statistical analysis was performed using a Two-way ANOVA with Tukey's multiple comparison (determination of significance and confidence intervals). The histograms show the mean and the confidence interval (CI) as an interval estimate of the general frame.

|                                       | Months after Vaccination |     |      |     | Nonvaccinated |
|---------------------------------------|--------------------------|-----|------|-----|---------------|
|                                       | 1-3                      | 4-8 | 9-11 | >12 |               |
| <b>Titers in the group ages 20-40</b> | 200                      | 800 | 0    | 50  | 100           |
|                                       | 100                      | 0   | 400  | 50  | 400           |
|                                       | 800                      | 25  | 100  | 25  | 200           |
|                                       | 100                      | 400 | 1600 | 200 | 400           |
|                                       | 1600                     | 800 | 200  | 0   | 0             |
|                                       | 800                      | 25  | 200  | 0   | 50            |
|                                       | 800                      | 100 | 100  | 0   | 100           |
|                                       | 100                      | 25  | 0    | 25  | 25            |
|                                       | 800                      | 400 | 50   |     | 50            |
|                                       | 400                      | 0   | 100  |     | 0             |
|                                       |                          | 100 | 25   |     |               |
|                                       |                          | 100 |      |     |               |
| <b>Titers in the group ages 40-60</b> | 800                      | 400 | 50   | 50  | 0             |
|                                       | 800                      | 400 | 50   | 25  | 0             |
|                                       | 1600                     | 100 | 400  | 100 | 50            |
|                                       | 400                      | 400 | 200  | 100 | 200           |
|                                       | 800                      | 25  |      | 100 | 400           |
|                                       | 400                      | 50  |      | 200 | 0             |
|                                       |                          | 100 |      | 100 | 400           |
|                                       |                          |     |      | 400 | 100           |
|                                       |                          |     |      | 100 | 50            |
|                                       |                          |     |      |     | 25            |
|                                       |                          |     |      |     | 200           |

| <b>Two-Way ANOVA</b>            |                             |                |                        |                     |                |  |
|---------------------------------|-----------------------------|----------------|------------------------|---------------------|----------------|--|
| <b>Table Analyzed</b>           | <b>Age vs. PA titers</b>    |                |                        |                     |                |  |
|                                 |                             |                |                        |                     |                |  |
|                                 | <b>Ordinary</b>             |                |                        |                     |                |  |
| <b>Alpha</b>                    | 0,05                        |                |                        |                     |                |  |
|                                 |                             |                |                        |                     |                |  |
| <b>Source of Variation</b>      | <b>% of total variation</b> | <b>P value</b> | <b>P value summary</b> | <b>Significant?</b> |                |  |
| <b>Interaction</b>              | 1,868                       | 0,693          | ns                     | No                  |                |  |
| <b>Row Factor</b>               | 33,82                       | < 0,0001       | ****                   | Yes                 |                |  |
| <b>Column Factor</b>            | 0,404                       | 0,4888         | ns                     | No                  |                |  |
|                                 |                             |                |                        |                     |                |  |
| <b>ANOVA table</b>              | <b>SS</b>                   | <b>DF</b>      | <b>MS</b>              | <b>F (DFn, DFd)</b> | <b>P value</b> |  |
| <b>Interaction</b>              | 200109                      | 4              | 50027                  | F (4, 79) = 0,5591  | P = 0,6930     |  |
| <b>Row Factor</b>               | 3623000                     | 4              | 905650                 | F (4, 79) = 10,12   | P < 0,0001     |  |
| <b>Column Factor</b>            | 43282                       | 1              | 43282                  | F (1, 79) = 0,4838  | P = 0,4888     |  |
| <b>Residual</b>                 | 7068000                     | 79             | 89472                  |                     |                |  |
|                                 |                             |                |                        |                     |                |  |
| <b>Number of missing values</b> | 31                          |                |                        |                     |                |  |

| <b>ANOVA Multiple Comparison</b>         |                   |                        |                     |                    |           |           |          |           |
|------------------------------------------|-------------------|------------------------|---------------------|--------------------|-----------|-----------|----------|-----------|
|                                          |                   |                        |                     |                    |           |           |          |           |
| <b>Number of families</b>                | 1                 |                        |                     |                    |           |           |          |           |
| <b>Number of comparisons per family</b>  | 10                |                        |                     |                    |           |           |          |           |
| <b>Alpha</b>                             | 0,05              |                        |                     |                    |           |           |          |           |
|                                          |                   |                        |                     |                    |           |           |          |           |
| <b>Tukey's multiple comparisons test</b> | <b>Mean Diff,</b> | <b>95% CI of diff,</b> | <b>Significant?</b> | <b>Summary</b>     |           |           |          |           |
|                                          |                   |                        |                     |                    |           |           |          |           |
|                                          |                   |                        |                     |                    |           |           |          |           |
| <i>20-40 years</i>                       |                   |                        |                     |                    |           |           |          |           |
| <b>1-3 vs. 4-8</b>                       | 338,8             | -18,81 to 696,3        | No                  | ns                 |           |           |          |           |
| <b>1-3 vs. 9-12</b>                      | 334,6             | -22,97 to 692,1        | No                  | ns                 |           |           |          |           |
| <b>1-3 vs. &gt;12</b>                    | 526,3             | 130,1 to 922,4         | Yes                 | **                 |           |           |          |           |
| <b>1-3 vs. Nonvaccinated</b>             | 437,5             | 64,04 to 811,0         | Yes                 | *                  |           |           |          |           |
| <b>4-8 vs. 9-12</b>                      | -4,167            | -345,1 to 336,8        | No                  | ns                 |           |           |          |           |
| <b>4-8 vs. &gt;12</b>                    | 187,5             | -193,7 to 568,7        | No                  | ns                 |           |           |          |           |
| <b>4-8 vs. Nonvaccinated</b>             | 98,75             | -258,8 to 456,3        | No                  | ns                 |           |           |          |           |
| <b>9-12 vs. &gt;12</b>                   | 191,7             | -189,5 to 572,8        | No                  | ns                 |           |           |          |           |
| <b>9-12 vs. Nonvaccinated</b>            | 102,9             | -254,6 to 460,5        | No                  | ns                 |           |           |          |           |
| <b>&gt;12 vs. Nonvaccinated</b>          | -88,75            | -484,9 to 307,4        | No                  | ns                 |           |           |          |           |
|                                          |                   |                        |                     |                    |           |           |          |           |
|                                          |                   |                        |                     |                    |           |           |          |           |
| <i>40-60 years</i>                       |                   |                        |                     |                    |           |           |          |           |
| <b>1-3 vs. 4-8</b>                       | 589,3             | 124,7 to 1054          | Yes                 | **                 |           |           |          |           |
| <b>1-3 vs. 9-12</b>                      | 625               | 85,96 to 1164          | Yes                 | *                  |           |           |          |           |
| <b>1-3 vs. &gt;12</b>                    | 669,4             | 229,3 to 1110          | Yes                 | ***                |           |           |          |           |
| <b>1-3 vs. Nonvaccinated</b>             | 670,5             | 246,6 to 1094          | Yes                 | ***                |           |           |          |           |
| <b>4-8 vs. 9-12</b>                      | 35,71             | -487,7 to 559,1        | No                  | ns                 |           |           |          |           |
| <b>4-8 vs. &gt;12</b>                    | 80,16             | -340,7 to 501,0        | No                  | ns                 |           |           |          |           |
| <b>4-8 vs. Nonvaccinated</b>             | 81,17             | -322,6 to 484,9        | No                  | ns                 |           |           |          |           |
| <b>9-12 vs. &gt;12</b>                   | 44,44             | -457,4 to 546,3        | No                  | ns                 |           |           |          |           |
| <b>9-12 vs. Nonvaccinated</b>            | 45,45             | -442,1 to 533,0        | No                  | ns                 |           |           |          |           |
| <b>&gt;12 vs. Nonvaccinated</b>          | 1,01              | -374,3 to 376,3        | No                  | ns                 |           |           |          |           |
|                                          |                   |                        |                     |                    |           |           |          |           |
|                                          |                   |                        |                     |                    |           |           |          |           |
| <b>Test details</b>                      | <b>Mean 1</b>     | <b>Mean 2</b>          | <b>Mean Diff,</b>   | <b>SE of diff,</b> | <b>N1</b> | <b>N2</b> | <b>q</b> | <b>DF</b> |
|                                          |                   |                        |                     |                    |           |           |          |           |
|                                          |                   |                        |                     |                    |           |           |          |           |
| <i>20-40 years</i>                       |                   |                        |                     |                    |           |           |          |           |
| <b>1-3 vs. 4-8</b>                       | 570,0             | 231,3                  | 338,8               | 128,1              | 10        | 12        | 3,741    | 79        |
| <b>1-3 vs. 9-11</b>                      | 570,0             | 235,4                  | 334,6               | 128,1              | 10        | 12        | 3,694    | 79        |
| <b>1-3 vs. &gt;12</b>                    | 570,0             | 43,75                  | 526,3               | 141,9              | 10        | 8         | 5,245    | 79        |
| <b>1-3 vs. Nonvaccinated</b>             | 570,0             | 132,5                  | 437,5               | 133,8              | 10        | 10        | 4,625    | 79        |
| <b>4-8 vs. 9-11</b>                      | 231,3             | 235,4                  | -4,167              | 122,1              | 12        | 12        | 0,04825  | 79        |
| <b>4-8 vs. &gt;12</b>                    | 231,3             | 43,75                  | 187,5               | 136,5              | 12        | 8         | 1,942    | 79        |
| <b>4-8 vs. Nonvaccinated</b>             | 231,3             | 132,5                  | 98,75               | 128,1              | 12        | 10        | 1,090    | 79        |
| <b>9-11 vs. &gt;12</b>                   | 235,4             | 43,75                  | 191,7               | 136,5              | 12        | 8         | 1,985    | 79        |

|                                 |       |       |        |       |    |    |         |    |
|---------------------------------|-------|-------|--------|-------|----|----|---------|----|
| <b>9-11 vs. Nonvaccinated</b>   | 235,4 | 132,5 | 102,9  | 128,1 | 12 | 10 | 1,136   | 79 |
| <b>&gt;12 vs. Nonvaccinated</b> | 43,75 | 132,5 | -88,75 | 141,9 | 8  | 10 | 0,8846  | 79 |
|                                 |       |       |        |       |    |    |         |    |
| <b>40-60 years</b>              |       |       |        |       |    |    |         |    |
| <b>1-3 vs. 4-8</b>              | 800   | 210,7 | 589,3  | 166,4 | 6  | 7  | 5,008   | 79 |
| <b>1-3 vs. 9-11</b>             | 800   | 175   | 625    | 193,1 | 6  | 4  | 4,578   | 79 |
| <b>1-3 vs. &gt;12</b>           | 800   | 130,6 | 669,4  | 157,6 | 6  | 9  | 6,005   | 79 |
| <b>1-3 vs. Nonvaccinated</b>    | 800   | 129,5 | 670,5  | 151,8 | 6  | 11 | 6,246   | 79 |
| <b>4-8 vs. 9-11</b>             | 210,7 | 175   | 35,71  | 187,5 | 7  | 4  | 0,2694  | 79 |
| <b>4-8 vs. &gt;12</b>           | 210,7 | 130,6 | 80,16  | 150,7 | 7  | 9  | 0,752   | 79 |
| <b>4-8 vs. Nonvaccinated</b>    | 210,7 | 129,5 | 81,17  | 144,6 | 7  | 11 | 0,7937  | 79 |
| <b>9-11 vs. &gt;12</b>          | 175   | 130,6 | 44,44  | 179,7 | 4  | 9  | 0,3497  | 79 |
| <b>9-11 vs. Nonvaccinated</b>   | 175   | 129,5 | 45,45  | 174,6 | 4  | 11 | 0,3681  | 79 |
| <b>&gt;12 vs. Nonvaccinated</b> | 130,6 | 129,5 | 1,01   | 134,4 | 9  | 11 | 0,01063 | 79 |

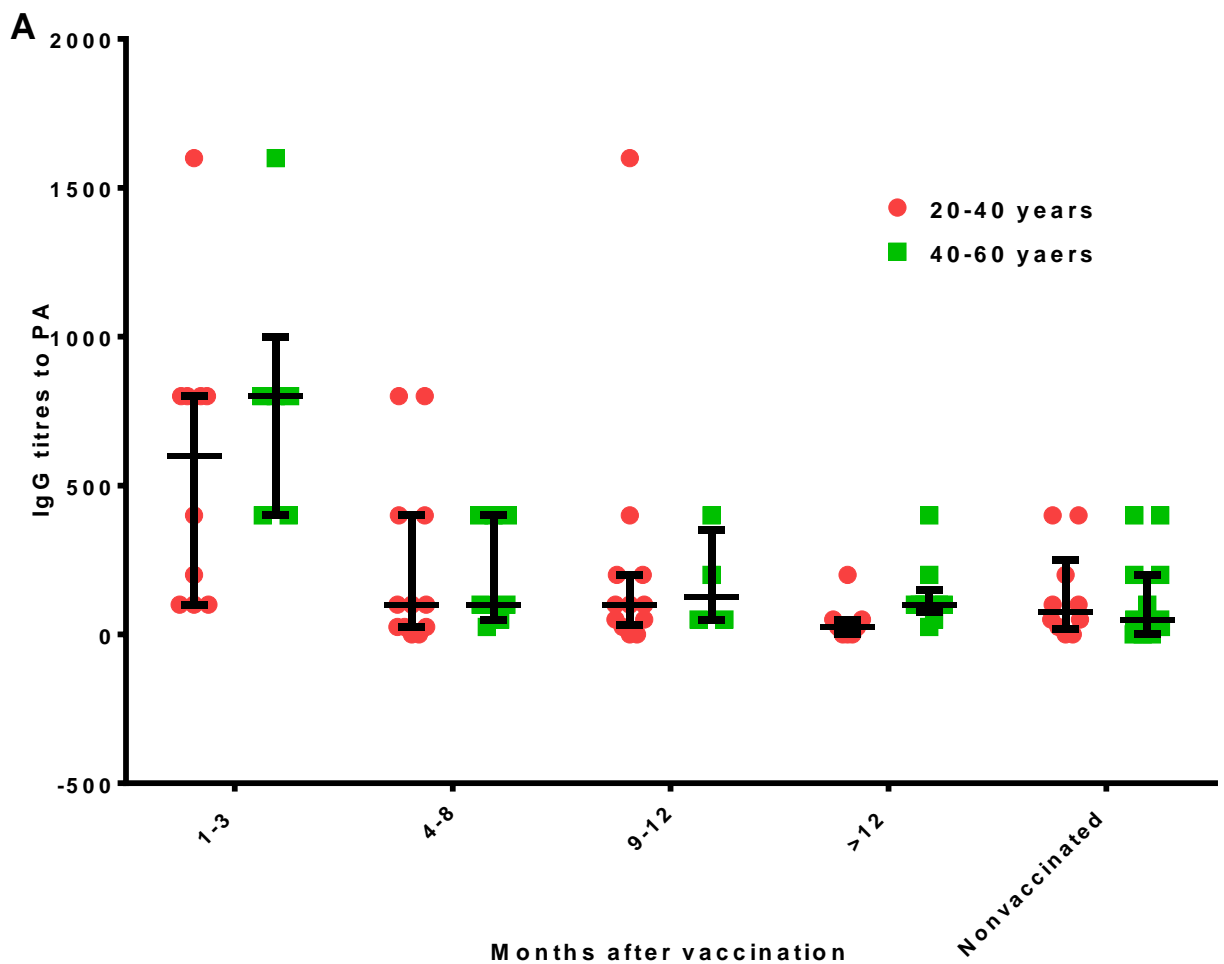

Supplement: pone.0260202.s031.pdf [file pone.0260202.s031.pdf]
