# Supplementary material for: Characterization of the adaptive immune response of donors receiving live anthrax vaccine
Source: PubMed Central journal article supplement (PMC8687594; doi:10.1371/journal.pone.0260202), 2021-12-20

## Analysis of the effect of age on the development and duration of anti-anthrax post-vaccination immunity (Age vs. LF titers).

Statistical analysis was performed using a Two-way ANOVA with Tukey's multiple comparison (determination of significance and confidence intervals). The histograms show the mean and the confidence interval (CI) as an interval estimate of the general frame.

|                                       | Months after Vaccination |      |      |     | Nonvaccinated |
|---------------------------------------|--------------------------|------|------|-----|---------------|
|                                       | 1-3                      | 4-8  | 9-11 | >12 |               |
| <b>Titers in the group ages 20-40</b> | 200                      | 100  | 0    | 0   | 50            |
|                                       | 400                      | 400  | 400  | 0   | 200           |
|                                       | 100                      | 1600 | 200  | 50  | 50            |
|                                       | 200                      | 400  | 800  | 0   | 50            |
|                                       | 800                      | 800  | 100  | 25  | 100           |
|                                       | 400                      | 800  | 200  | 25  | 50            |
|                                       | 800                      | 25   | 100  | 50  | 0             |
|                                       | 400                      | 100  | 0    | 25  | 0             |
|                                       | 50                       | 400  | 100  |     | 0             |
|                                       | 400                      | 25   | 25   |     | 0             |
|                                       |                          | 100  | 25   |     |               |
| <b>Titers in the group ages 40-60</b> | 800                      | 100  | 400  | 0   | 25            |
|                                       | 400                      | 20   | 0    | 0   | 25            |
|                                       | 800                      | 25   | 200  | 0   | 200           |
|                                       | 800                      | 400  | 100  | 25  | 0             |
|                                       | 100                      | 25   |      | 0   | 25            |
|                                       | 400                      | 25   |      | 200 | 0             |
|                                       |                          | 100  |      | 0   | 0             |
|                                       |                          |      |      | 200 | 100           |
|                                       |                          |      |      | 0   | 200           |
|                                       |                          |      |      |     | 100           |
|                                       |                          |      |      |     | 0             |

| <b>Two-Way ANOVA</b>            |                             |                |                        |                     |                |  |
|---------------------------------|-----------------------------|----------------|------------------------|---------------------|----------------|--|
| <b>Table Analyzed</b>           | <b>Age vs. LF titers</b>    |                |                        |                     |                |  |
|                                 |                             |                |                        |                     |                |  |
|                                 | <b>Ordinary</b>             |                |                        |                     |                |  |
| <b>Alpha</b>                    | 0,05                        |                |                        |                     |                |  |
|                                 |                             |                |                        |                     |                |  |
| <b>Source of Variation</b>      | <b>% of total variation</b> | <b>P value</b> | <b>P value summary</b> | <b>Significant?</b> |                |  |
| <b>Interaction</b>              | 6,403                       | 0,1116         | ns                     | No                  |                |  |
| <b>Row Factor</b>               | 28,99                       | < 0,0001       | ****                   | Yes                 |                |  |
| <b>Column Factor</b>            | 0,04649                     | 0,8129         | ns                     | No                  |                |  |
|                                 |                             |                |                        |                     |                |  |
| <b>ANOVA table</b>              | <b>SS</b>                   | <b>DF</b>      | <b>MS</b>              | <b>F (DFn, DFd)</b> | <b>P value</b> |  |
| <b>Interaction</b>              | 440156                      | 4              | 110039                 | F (4, 78) = 1,943   | P = 0,1116     |  |
| <b>Row Factor</b>               | 1,993e+006                  | 4              | 498245                 | F (4, 78) = 8,797   | P < 0,0001     |  |
| <b>Column Factor</b>            | 3196                        | 1              | 3196                   | F (1, 78) = 0,05643 | P = 0,8129     |  |
| <b>Residual</b>                 | 4,418e+006                  | 78             | 56637                  |                     |                |  |
|                                 |                             |                |                        |                     |                |  |
| <b>Number of missing values</b> | 32                          |                |                        |                     |                |  |

| ANOVA Multiple Comparison                |                   |                        |                     |                    |           |           |          |           |
|------------------------------------------|-------------------|------------------------|---------------------|--------------------|-----------|-----------|----------|-----------|
| Number of families                       | 1                 |                        |                     |                    |           |           |          |           |
| Number of comparisons per family         | 10                |                        |                     |                    |           |           |          |           |
| Alpha                                    | 0,05              |                        |                     |                    |           |           |          |           |
|                                          |                   |                        |                     |                    |           |           |          |           |
| <b>Tukey's multiple comparisons test</b> | <b>Mean Diff,</b> | <b>95% CI of diff,</b> | <b>Significant?</b> | <b>Summary</b>     |           |           |          |           |
|                                          |                   |                        |                     |                    |           |           |          |           |
|                                          |                   |                        |                     |                    |           |           |          |           |
| <i>20-40 years</i>                       |                   |                        |                     |                    |           |           |          |           |
| 1-3 vs. 4-8                              | -22,92            | -307,5 to 261,6        | No                  | ns                 |           |           |          |           |
| 1-3 vs. 9-12                             | 197,7             | -92,66 to 488,1        | No                  | ns                 |           |           |          |           |
| 1-3 vs. >12                              | 353,1             | 37,88 to 668,4         | Yes                 | *                  |           |           |          |           |
| 1-3 vs. Nonvaccinated                    | 325               | 27,78 to 622,2         | Yes                 | *                  |           |           |          |           |
| 4-8 vs. 9-12                             | 220,6             | -56,78 to 498,1        | No                  | ns                 |           |           |          |           |
| 4-8 vs. >12                              | 376               | 72,69 to 679,4         | Yes                 | **                 |           |           |          |           |
| 4-8 vs. Nonvaccinated                    | 347,9             | 63,35 to 632,5         | Yes                 | **                 |           |           |          |           |
| 9-12 vs. >12                             | 155,4             | -153,4 to 464,2        | No                  | ns                 |           |           |          |           |
| 9-12 vs. Nonvaccinated                   | 127,3             | -163,1 to 417,7        | No                  | ns                 |           |           |          |           |
| >12 vs. Nonvaccinated                    | -28,13            | -343,4 to 287,1        | No                  | ns                 |           |           |          |           |
|                                          |                   |                        |                     |                    |           |           |          |           |
|                                          |                   |                        |                     |                    |           |           |          |           |
| <i>40-60 years</i>                       |                   |                        |                     |                    |           |           |          |           |
| 1-3 vs. 4-8                              | 425               | 55,25 to 794,8         | Yes                 | *                  |           |           |          |           |
| 1-3 vs. 9-12                             | 375               | -54,00 to 804,0        | No                  | ns                 |           |           |          |           |
| 1-3 vs. >12                              | 502,8             | 152,5 to 853,1         | Yes                 | **                 |           |           |          |           |
| 1-3 vs. Nonvaccinated                    | 488,6             | 151,3 to 825,9         | Yes                 | **                 |           |           |          |           |
| 4-8 vs. 9-12                             | -50               | -466,6 to 366,6        | No                  | ns                 |           |           |          |           |
| 4-8 vs. >12                              | 77,78             | -257,2 to 412,7        | No                  | ns                 |           |           |          |           |
| 4-8 vs. Nonvaccinated                    | 63,64             | -257,7 to 385,0        | No                  | ns                 |           |           |          |           |
| 9-12 vs. >12                             | 127,8             | -271,6 to 527,2        | No                  | ns                 |           |           |          |           |
| 9-12 vs. Nonvaccinated                   | 113,6             | -274,4 to 501,7        | No                  | ns                 |           |           |          |           |
| >12 vs. Nonvaccinated                    | -14,14            | -312,9 to 284,6        | No                  | ns                 |           |           |          |           |
|                                          |                   |                        |                     |                    |           |           |          |           |
|                                          |                   |                        |                     |                    |           |           |          |           |
| <b>Test details</b>                      | <b>Mean 1</b>     | <b>Mean 2</b>          | <b>Mean Diff,</b>   | <b>SE of diff,</b> | <b>N1</b> | <b>N2</b> | <b>q</b> | <b>DF</b> |
|                                          |                   |                        |                     |                    |           |           |          |           |
|                                          |                   |                        |                     |                    |           |           |          |           |
| <i>20-40 years</i>                       |                   |                        |                     |                    |           |           |          |           |
| 1-3 vs. 4-8                              | 375               | 397,9                  | -22,92              | 101,9              | 10        | 12        | 0,318    | 78        |
| 1-3 vs. 9-11                             | 375               | 177,3                  | 197,7               | 104                | 10        | 11        | 2,689    | 78        |
| 1-3 vs. >12                              | 375               | 21,88                  | 353,1               | 112,9              | 10        | 8         | 4,424    | 78        |
| 1-3 vs. Nonvaccinated                    | 375               | 50                     | 325                 | 106,4              | 10        | 10        | 4,318    | 78        |
| 4-8 vs. 9-11                             | 397,9             | 177,3                  | 220,6               | 99,34              | 12        | 11        | 3,141    | 78        |
| 4-8 vs. >12                              | 397,9             | 21,88                  | 376                 | 108,6              | 12        | 8         | 4,896    | 78        |
| 4-8 vs. Nonvaccinated                    | 397,9             | 50                     | 347,9               | 101,9              | 12        | 10        | 4,829    | 78        |
| 9-11 vs. >12                             | 177,3             | 21,88                  | 155,4               | 110,6              | 11        | 8         | 1,987    | 78        |

|                        |       |       |        |       |    |    |        |    |
|------------------------|-------|-------|--------|-------|----|----|--------|----|
| 9-11 vs. Nonvaccinated | 177,3 | 50    | 127,3  | 104   | 11 | 10 | 1,731  | 78 |
| >12 vs. Nonvaccinated  | 21,88 | 50    | -28,13 | 112,9 | 8  | 10 | 0,3523 | 78 |
| <i>40-60 years</i>     |       |       |        |       |    |    |        |    |
| 1-3 vs. 4-8            | 550   | 125   | 425    | 132,4 | 6  | 7  | 4,539  | 78 |
| 1-3 vs. 9-11           | 550   | 175   | 375    | 153,6 | 6  | 4  | 3,452  | 78 |
| 1-3 vs. >12            | 550   | 47,22 | 502,8  | 125,4 | 6  | 9  | 5,669  | 78 |
| 1-3 vs. Nonvaccinated  | 550   | 61,36 | 488,6  | 120,8 | 6  | 11 | 5,721  | 78 |
| 4-8 vs. 9-11           | 125   | 175   | -50    | 149,2 | 7  | 4  | 0,474  | 78 |
| 4-8 vs. >12            | 125   | 47,22 | 77,78  | 119,9 | 7  | 9  | 0,9171 | 78 |
| 4-8 vs. Nonvaccinated  | 125   | 61,36 | 63,64  | 115,1 | 7  | 11 | 0,7821 | 78 |
| 9-11 vs. >12           | 175   | 47,22 | 127,8  | 143   | 4  | 9  | 1,264  | 78 |
| 9-11 vs. Nonvaccinated | 175   | 61,36 | 113,6  | 139   | 4  | 11 | 1,157  | 78 |
| >12 vs. Nonvaccinated  | 47,22 | 61,36 | -14,14 | 107   | 9  | 11 | 0,187  | 78 |

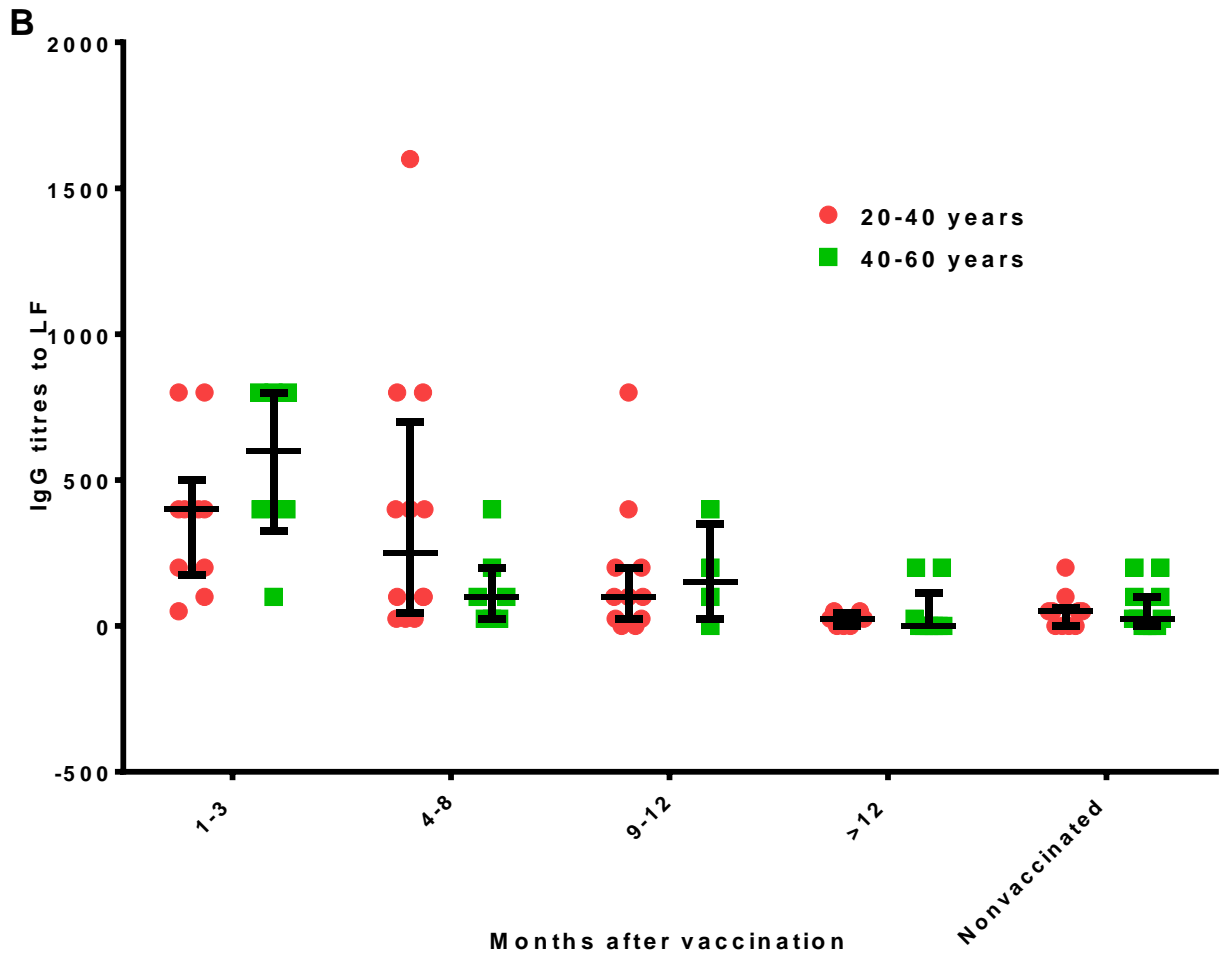

Supplement: pone.0260202.s032.pdf [file pone.0260202.s032.pdf]
