# Supplementary material for: Characterization of the adaptive immune response of donors receiving live anthrax vaccine
Source: PubMed Central journal article supplement (PMC8687594; doi:10.1371/journal.pone.0260202), 2021-12-20

## Analysis of the effect of age on the development and duration of anti-anthrax post-vaccination immunity (Age vs. Spores titers).

Statistical analysis was performed using a Two-way ANOVA with Tukey's multiple comparison (determination of significance and confidence intervals). The histograms show the mean and the confidence interval (CI) as an interval estimate of the general frame.

|                                       | Months after Vaccination |      |      |      | Nonvaccinated |
|---------------------------------------|--------------------------|------|------|------|---------------|
|                                       | 1-3                      | 4-8  | 9-11 | >12  |               |
| <b>Titers in the group ages 20-40</b> | 200                      | 200  | 0    | 200  | 200           |
|                                       | 200                      | 400  | 200  | 400  | 0             |
|                                       | 400                      | 1600 | 800  | 400  | 50            |
|                                       | 800                      | 800  | 400  | 200  | 100           |
|                                       | 1600                     | 1600 | 200  | 200  | 800           |
|                                       | 1600                     | 200  | 200  | 0    | 400           |
|                                       | 800                      | 200  | 0    | 400  | 50            |
|                                       | 400                      | 100  | 25   | 200  | 50            |
|                                       | 1600                     | 800  | 100  |      | 25            |
|                                       | 400                      | 50   | 100  |      | 0             |
|                                       |                          | 400  | 100  |      |               |
|                                       | 200                      |      |      |      |               |
| <b>Titers in the group ages 40-60</b> | 1600                     | 400  | 100  | 200  | 100           |
|                                       | 1600                     | 400  | 50   | 200  | 0             |
|                                       | 3200                     | 800  | 200  | 100  | 200           |
|                                       | 3200                     | 3200 | 400  | 0    | 50            |
|                                       | 800                      | 100  |      | 200  | 0             |
|                                       | 800                      | 400  |      | 1600 | 0             |
|                                       |                          | 200  |      | 200  | 100           |
|                                       |                          |      |      | 800  | 50            |
|                                       |                          |      |      | 0    | 25            |
|                                       |                          |      |      |      | 0             |
|                                       |                          |      |      |      | 100           |

| <b>Two-Way ANOVA</b>            |                              |                |                        |                     |                |  |
|---------------------------------|------------------------------|----------------|------------------------|---------------------|----------------|--|
| <b>Table Analyzed</b>           | <b>Age vs. Spores titers</b> |                |                        |                     |                |  |
|                                 |                              |                |                        |                     |                |  |
|                                 | <b>Ordinary</b>              |                |                        |                     |                |  |
| <b>Alpha</b>                    | 0,05                         |                |                        |                     |                |  |
|                                 |                              |                |                        |                     |                |  |
| <b>Source of Variation</b>      | <b>% of total variation</b>  | <b>P value</b> | <b>P value summary</b> | <b>Significant?</b> |                |  |
| <b>Interaction</b>              | 5,43                         | 0,1513         | ns                     | No                  |                |  |
| <b>Row Factor</b>               | 34,33                        | < 0,0001       | ****                   | Yes                 |                |  |
| <b>Column Factor</b>            | 2,019                        | 0,1124         | ns                     | No                  |                |  |
|                                 |                              |                |                        |                     |                |  |
| <b>ANOVA table</b>              | <b>SS</b>                    | <b>DF</b>      | <b>MS</b>              | <b>F (DFn, DFd)</b> | <b>P value</b> |  |
| <b>Interaction</b>              | 2220000                      | 4              | 555003                 | F (4, 77) = 1,733   | P = 0,1513     |  |
| <b>Row Factor</b>               | 14030000                     | 4              | 3508000                | F (4, 77) = 10,96   | P < 0,0001     |  |
| <b>Column Factor</b>            | 825600                       | 1              | 825600                 | F (1, 77) = 2,578   | P = 0,1124     |  |
| <b>Residual</b>                 | 24660000                     | 77             | 320222                 |                     |                |  |
|                                 |                              |                |                        |                     |                |  |
| <b>Number of missing values</b> | 33                           |                |                        |                     |                |  |

| ANOVA Multiple Comparison         |            |                 |              |             |    |    |        |    |
|-----------------------------------|------------|-----------------|--------------|-------------|----|----|--------|----|
| Number of families                | 1          |                 |              |             |    |    |        |    |
| Number of comparisons per family  | 10         |                 |              |             |    |    |        |    |
| Alpha                             | 0,05       |                 |              |             |    |    |        |    |
| Tukey's multiple comparisons test | Mean Diff, | 95% CI of diff, | Significant? | Summary     |    |    |        |    |
| <i>20-40 years</i>                |            |                 |              |             |    |    |        |    |
| 1-3 vs. 4-8                       | 298,6      | -398,4 to 995,7 | No           | ns          |    |    |        |    |
| 1-3 vs. 9-12                      | 641,9      | -84,37 to 1368  | No           | ns          |    |    |        |    |
| 1-3 vs. >12                       | 594,4      | -173,7 to 1363  | No           | ns          |    |    |        |    |
| 1-3 vs. Nonvaccinated             | 658,3      | -86,85 to 1404  | No           | ns          |    |    |        |    |
| 4-8 vs. 9-12                      | 343,3      | -333,5 to 1020  | No           | ns          |    |    |        |    |
| 4-8 vs. >12                       | 295,8      | -425,7 to 1017  | No           | ns          |    |    |        |    |
| 4-8 vs. Nonvaccinated             | 359,7      | -337,3 to 1057  | No           | ns          |    |    |        |    |
| 9-12 vs. >12                      | -47,5      | -797,3 to 702,3 | No           | ns          |    |    |        |    |
| 9-12 vs. Nonvaccinated            | 16,39      | -709,9 to 742,7 | No           | ns          |    |    |        |    |
| >12 vs. Nonvaccinated             | 63,89      | -704,2 to 832,0 | No           | ns          |    |    |        |    |
| <i>40-60 years</i>                |            |                 |              |             |    |    |        |    |
| 1-3 vs. 4-8                       | 871,4      | 26,47 to 1716   | Yes          | *           |    |    |        |    |
| 1-3 vs. 9-12                      | 1470       | 478,8 to 2460   | Yes          | ***         |    |    |        |    |
| 1-3 vs. >12                       | 1290       | 493,8 to 2087   | Yes          | ***         |    |    |        |    |
| 1-3 vs. Nonvaccinated             | 1605       | 853,3 to 2357   | Yes          | ****        |    |    |        |    |
| 4-8 vs. 9-12                      | 598,2      | -392,6 to 1589  | No           | ns          |    |    |        |    |
| 4-8 vs. >12                       | 419        | -377,6 to 1216  | No           | ns          |    |    |        |    |
| 4-8 vs. Nonvaccinated             | 733,6      | -18,18 to 1485  | No           | ns          |    |    |        |    |
| 9-12 vs. >12                      | -179,2     | -1129 to 770,8  | No           | ns          |    |    |        |    |
| 9-12 vs. Nonvaccinated            | 135,4      | -777,2 to 1048  | No           | ns          |    |    |        |    |
| >12 vs. Nonvaccinated             | 314,6      | -382,5 to 1012  | No           | ns          |    |    |        |    |
| Test details                      | Mean 1     | Mean 2          | Mean Diff,   | SE of diff, | N1 | N2 | q      | DF |
| <i>20-40 years</i>                |            |                 |              |             |    |    |        |    |
| 1-3 vs. 4-8                       | 844,4      | 545,8           | 298,6        | 249,5       | 9  | 12 | 1,692  | 77 |
| 1-3 vs. 9-11                      | 844,4      | 202,5           | 641,9        | 260         | 9  | 10 | 3,492  | 77 |
| 1-3 vs. >12                       | 844,4      | 250             | 594,4        | 275         | 9  | 8  | 3,057  | 77 |
| 1-3 vs. Nonvaccinated             | 844,4      | 186,1           | 658,3        | 266,8       | 9  | 9  | 3,49   | 77 |
| 4-8 vs. 9-11                      | 545,8      | 202,5           | 343,3        | 242,3       | 12 | 10 | 2,004  | 77 |
| 4-8 vs. >12                       | 545,8      | 250             | 295,8        | 258,3       | 12 | 8  | 1,62   | 77 |
| 4-8 vs. Nonvaccinated             | 545,8      | 186,1           | 359,7        | 249,5       | 12 | 9  | 2,039  | 77 |
| 9-11 vs. >12                      | 202,5      | 250             | -47,5        | 268,4       | 10 | 8  | 0,2503 | 77 |

|                                 |       |       |        |       |    |    |         |    |
|---------------------------------|-------|-------|--------|-------|----|----|---------|----|
| <b>9-11 vs. Nonvaccinated</b>   | 202,5 | 186,1 | 16,39  | 260   | 10 | 9  | 0,08914 | 77 |
| <b>&gt;12 vs. Nonvaccinated</b> | 250   | 186,1 | 63,89  | 275   | 8  | 9  | 0,3286  | 77 |
| <i>40-60 years</i>              |       |       |        |       |    |    |         |    |
| <b>1-3 vs. 4-8</b>              | 1657  | 785,7 | 871,4  | 302,5 | 7  | 7  | 4,074   | 77 |
| <b>1-3 vs. 9-11</b>             | 1657  | 187,5 | 1470   | 354,7 | 7  | 4  | 5,86    | 77 |
| <b>1-3 vs. &gt;12</b>           | 1657  | 366,7 | 1290   | 285,2 | 7  | 9  | 6,4     | 77 |
| <b>1-3 vs. Nonvaccinated</b>    | 1657  | 52,08 | 1605   | 269,1 | 7  | 12 | 8,434   | 77 |
| <b>4-8 vs. 9-11</b>             | 785,7 | 187,5 | 598,2  | 354,7 | 7  | 4  | 2,385   | 77 |
| <b>4-8 vs. &gt;12</b>           | 785,7 | 366,7 | 419    | 285,2 | 7  | 9  | 2,078   | 77 |
| <b>4-8 vs. Nonvaccinated</b>    | 785,7 | 52,08 | 733,6  | 269,1 | 7  | 12 | 3,855   | 77 |
| <b>9-11 vs. &gt;12</b>          | 187,5 | 366,7 | -179,2 | 340,1 | 4  | 9  | 0,7451  | 77 |
| <b>9-11 vs. Nonvaccinated</b>   | 187,5 | 52,08 | 135,4  | 326,7 | 4  | 12 | 0,5862  | 77 |
| <b>&gt;12 vs. Nonvaccinated</b> | 366,7 | 52,08 | 314,6  | 249,5 | 9  | 12 | 1,783   | 77 |

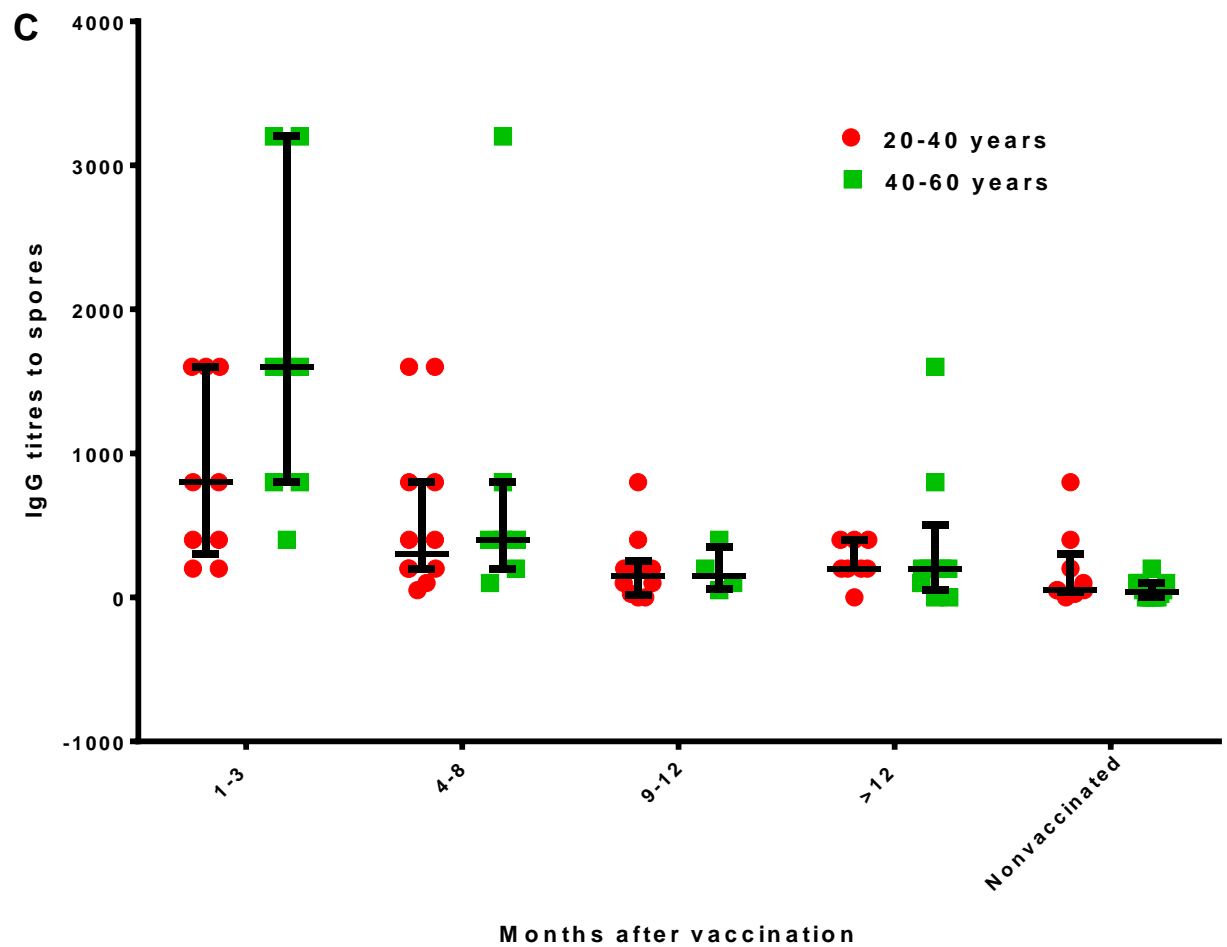

Supplement: pone.0260202.s033.pdf [file pone.0260202.s033.pdf]
