# Supplementary material for: Characterization of the adaptive immune response of donors receiving live anthrax vaccine
Source: PubMed Central journal article supplement (PMC8687594; doi:10.1371/journal.pone.0260202), 2021-12-20

## Analysis of the effect of age on the development and duration of anti-anthrax post-vaccination immunity (Age vs. TNA).

Statistical analysis was performed using a Two-way ANOVA with Tukey's multiple comparison (determination of significance and confidence intervals). The histograms show the mean and the confidence interval (CI) as an interval estimate of the general frame.

|                                                                         | Months after Vaccination |     |      |     | Nonvaccinated |
|-------------------------------------------------------------------------|--------------------------|-----|------|-----|---------------|
|                                                                         | 1-3                      | 4-8 | 9-11 | >12 |               |
| <b>Viability (%) in TNA assay for the serum in the group ages 20-40</b> | 31                       | 20  | 12   | 31  | 23            |
|                                                                         | 39                       | 42  | 39   | 12  | 12            |
|                                                                         | 48                       | 38  | 26   | 26  | 17            |
|                                                                         | 50                       | 39  | 79   | 48  | 14            |
|                                                                         | 43                       | 45  | 44   | 21  | 21            |
|                                                                         | 53                       | 29  | 37   | 26  | 12            |
|                                                                         | 72                       | 23  | 17   | 5   | 10            |
|                                                                         | 30                       | 37  | 14   | 30  | 16            |
|                                                                         | 22                       | 50  | 51   |     | 9             |
|                                                                         | 37                       | 34  | 41   |     | 17            |
|                                                                         |                          | 18  | 29   |     |               |
|                                                                         |                          | 33  |      |     |               |
| <b>Viability (%) in TNA assay for the serum in the group ages 40-60</b> | 40                       | 26  | 41   | 28  | 14            |
|                                                                         | 56                       | 65  | 37   | 70  | 8             |
|                                                                         | 51                       | 19  | 42   | 40  | 13            |
|                                                                         | 69                       | 42  | 57   | 43  | 9             |
|                                                                         | 27                       | 34  |      | 29  | 7             |
|                                                                         | 43                       | 52  |      | 26  | 14            |
|                                                                         |                          | 16  |      | 26  | 7             |
|                                                                         |                          |     |      | 58  | 12            |
|                                                                         |                          |     |      | 14  | 12            |
|                                                                         |                          |     |      |     | 11            |
|                                                                         |                          |     |      |     | 9             |

| <b>Two-Way ANOVA</b>            |                             |                |                        |                     |                |  |
|---------------------------------|-----------------------------|----------------|------------------------|---------------------|----------------|--|
| <b>Table Analyzed</b>           | <b>Age vs. TNA</b>          |                |                        |                     |                |  |
|                                 | <b>Ordinary</b>             |                |                        |                     |                |  |
| <b>Alpha</b>                    | 0,05                        |                |                        |                     |                |  |
|                                 |                             |                |                        |                     |                |  |
| <b>Source of Variation</b>      | <b>% of total variation</b> | <b>P value</b> | <b>P value summary</b> | <b>Significant?</b> |                |  |
| <b>Interaction</b>              | 2,909                       | 0,3778         | ns                     | No                  |                |  |
| <b>Row Factor</b>               | 43,61                       | < 0,0001       | ****                   | Yes                 |                |  |
| <b>Column Factor</b>            | 1,765                       | 0,1114         | ns                     | No                  |                |  |
|                                 |                             |                |                        |                     |                |  |
| <b>ANOVA table</b>              | <b>SS</b>                   | <b>DF</b>      | <b>MS</b>              | <b>F (DFn, DFd)</b> | <b>P value</b> |  |
| <b>Interaction</b>              | 748                         | 4              | 187                    | F (4, 78) = 1,069   | P = 0,3778     |  |
| <b>Row Factor</b>               | 11213                       | 4              | 2803                   | F (4, 78) = 16,02   | P < 0,0001     |  |
| <b>Column Factor</b>            | 453,7                       | 1              | 453,7                  | F (1, 78) = 2,593   | P = 0,1114     |  |
| <b>Residual</b>                 | 13649                       | 78             | 175                    |                     |                |  |
|                                 |                             |                |                        |                     |                |  |
| <b>Number of missing values</b> | 32                          |                |                        |                     |                |  |

| ANOVA Multiple Comparison         |            |                 |              |             |    |    |        |    |
|-----------------------------------|------------|-----------------|--------------|-------------|----|----|--------|----|
| Number of families                | 1          |                 |              |             |    |    |        |    |
| Number of comparisons per family  | 10         |                 |              |             |    |    |        |    |
| Alpha                             | 0,05       |                 |              |             |    |    |        |    |
| Tukey's multiple comparisons test | Mean Diff, | 95% CI of diff, | Significant? | Summary     |    |    |        |    |
| <i>20-40 years</i>                |            |                 |              |             |    |    |        |    |
| 1-3 vs. 4-8                       | 8,5        | -7,317 to 24,32 | No           | ns          |    |    |        |    |
| 1-3 vs. 9-12                      | 7,199      | -8,942 to 23,34 | No           | ns          |    |    |        |    |
| 1-3 vs. >12                       | 17,73      | 0,2048 to 35,25 | Yes          | *           |    |    |        |    |
| 1-3 vs. Nonvaccinated             | 27,58      | 11,06 to 44,10  | Yes          | ***         |    |    |        |    |
| 4-8 vs. 9-12                      | -1,301     | -16,72 to 14,12 | No           | ns          |    |    |        |    |
| 4-8 vs. >12                       | 9,228      | -7,634 to 26,09 | No           | ns          |    |    |        |    |
| 4-8 vs. Nonvaccinated             | 19,08      | 3,260 to 34,89  | Yes          | *           |    |    |        |    |
| 9-12 vs. >12                      | 10,53      | -6,636 to 27,69 | No           | ns          |    |    |        |    |
| 9-12 vs. Nonvaccinated            | 20,38      | 4,238 to 36,52  | Yes          | **          |    |    |        |    |
| >12 vs. Nonvaccinated             | 9,85       | -7,673 to 27,37 | No           | ns          |    |    |        |    |
| <i>40-60 years</i>                |            |                 |              |             |    |    |        |    |
| 1-3 vs. 4-8                       | 11,38      | -9,171 to 31,93 | No           | ns          |    |    |        |    |
| 1-3 vs. 9-12                      | 3,543      | -20,30 to 27,39 | No           | ns          |    |    |        |    |
| 1-3 vs. >12                       | 10,74      | -8,734 to 30,21 | No           | ns          |    |    |        |    |
| 1-3 vs. Nonvaccinated             | 37,26      | 18,51 to 56,01  | Yes          | ****        |    |    |        |    |
| 4-8 vs. 9-12                      | -7,838     | -30,99 to 15,32 | No           | ns          |    |    |        |    |
| 4-8 vs. >12                       | -0,6452    | -19,26 to 17,97 | No           | ns          |    |    |        |    |
| 4-8 vs. Nonvaccinated             | 25,88      | 8,017 to 43,74  | Yes          | **          |    |    |        |    |
| 9-12 vs. >12                      | 7,193      | -15,01 to 29,39 | No           | ns          |    |    |        |    |
| 9-12 vs. Nonvaccinated            | 33,72      | 12,15 to 55,29  | Yes          | ***         |    |    |        |    |
| >12 vs. Nonvaccinated             | 26,52      | 9,919 to 43,13  | Yes          | ***         |    |    |        |    |
| Test details                      | Mean 1     | Mean 2          | Mean Diff,   | SE of diff, | N1 | N2 | q      | DF |
| <i>20-40 years</i>                |            |                 |              |             |    |    |        |    |
| 1-3 vs. 4-8                       | 42,5       | 34              | 8,5          | 5,664       | 10 | 12 | 2,122  | 78 |
| 1-3 vs. 9-11                      | 42,5       | 35,3            | 7,199        | 5,78        | 10 | 11 | 1,761  | 78 |
| 1-3 vs. >12                       | 42,5       | 24,77           | 17,73        | 6,275       | 10 | 8  | 3,996  | 78 |
| 1-3 vs. Nonvaccinated             | 42,5       | 14,92           | 27,58        | 5,916       | 10 | 10 | 6,592  | 78 |
| 4-8 vs. 9-11                      | 34         | 35,3            | -1,301       | 5,522       | 12 | 11 | 0,3333 | 78 |
| 4-8 vs. >12                       | 34         | 24,77           | 9,228        | 6,038       | 12 | 8  | 2,161  | 78 |
| 4-8 vs. Nonvaccinated             | 34         | 14,92           | 19,08        | 5,664       | 12 | 10 | 4,763  | 78 |
| 9-11 vs. >12                      | 35,3       | 24,77           | 10,53        | 6,147       | 11 | 8  | 2,422  | 78 |

|                                 |       |       |         |       |    |    |        |    |
|---------------------------------|-------|-------|---------|-------|----|----|--------|----|
| <b>9-11 vs. Nonvaccinated</b>   | 35,3  | 14,92 | 20,38   | 5,78  | 11 | 10 | 4,986  | 78 |
| <b>&gt;12 vs. Nonvaccinated</b> | 24,77 | 14,92 | 9,85    | 6,275 | 8  | 10 | 2,22   | 78 |
|                                 |       |       |         |       |    |    |        |    |
| <b>40-60 years</b>              |       |       |         |       |    |    |        |    |
| <b>1-3 vs. 4-8</b>              | 47,67 | 36,29 | 11,38   | 7,359 | 6  | 7  | 2,187  | 78 |
| <b>1-3 vs. 9-11</b>             | 47,67 | 44,12 | 3,543   | 8,539 | 6  | 4  | 0,5868 | 78 |
| <b>1-3 vs. &gt;12</b>           | 47,67 | 36,93 | 10,74   | 6,972 | 6  | 9  | 2,178  | 78 |
| <b>1-3 vs. Nonvaccinated</b>    | 47,67 | 10,41 | 37,26   | 6,714 | 6  | 11 | 7,849  | 78 |
| <b>4-8 vs. 9-11</b>             | 36,29 | 44,12 | -7,838  | 8,291 | 7  | 4  | 1,337  | 78 |
| <b>4-8 vs. &gt;12</b>           | 36,29 | 36,93 | -0,6452 | 6,666 | 7  | 9  | 0,1369 | 78 |
| <b>4-8 vs. Nonvaccinated</b>    | 36,29 | 10,41 | 25,88   | 6,396 | 7  | 11 | 5,722  | 78 |
| <b>9-11 vs. &gt;12</b>          | 44,12 | 36,93 | 7,193   | 7,949 | 4  | 9  | 1,28   | 78 |
| <b>9-11 vs. Nonvaccinated</b>   | 44,12 | 10,41 | 33,72   | 7,724 | 4  | 11 | 6,174  | 78 |
| <b>&gt;12 vs. Nonvaccinated</b> | 36,93 | 10,41 | 26,52   | 5,946 | 9  | 11 | 6,309  | 78 |

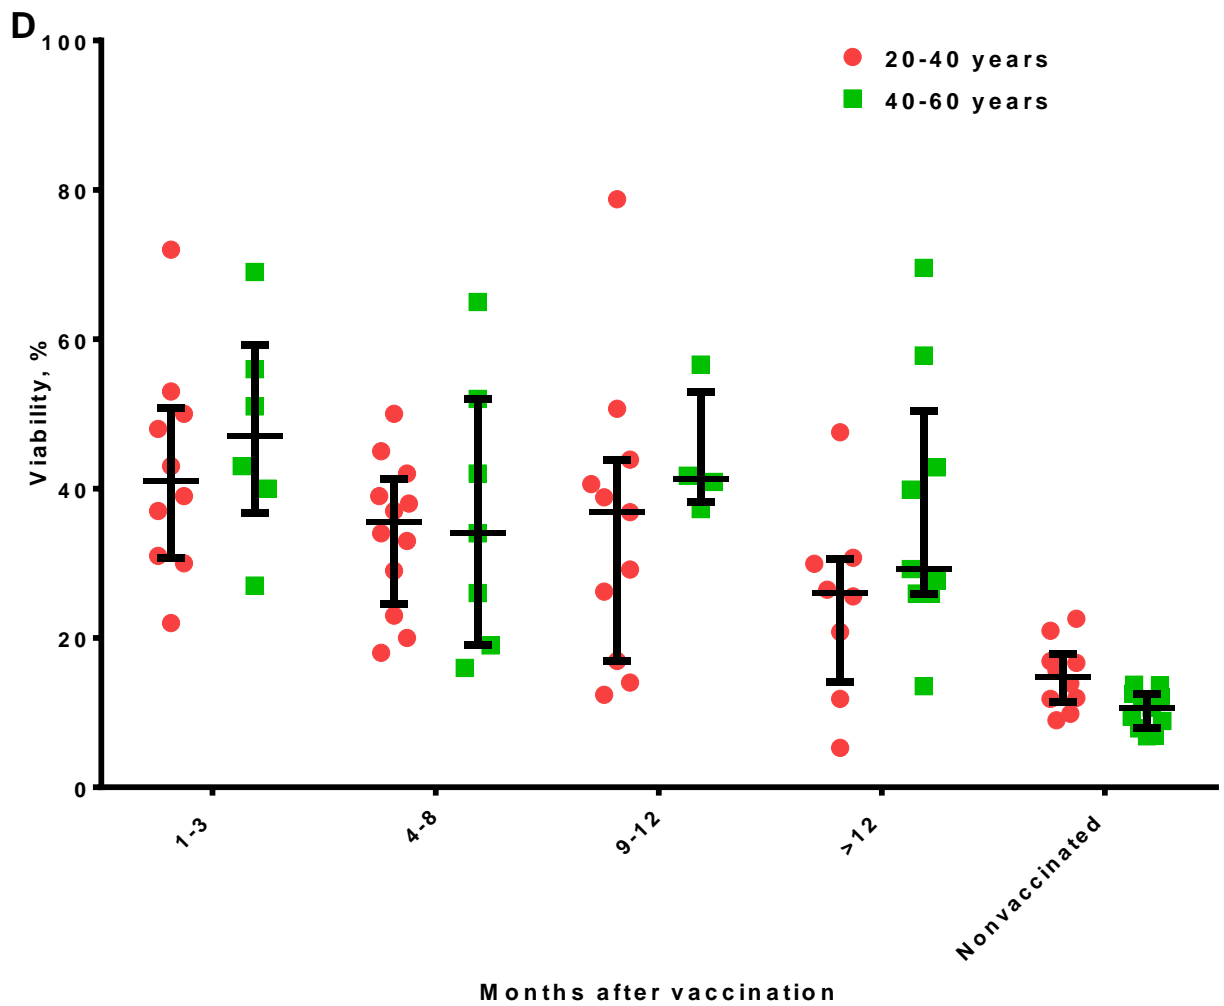

Supplement: pone.0260202.s034.pdf [file pone.0260202.s034.pdf]
