# Supplementary material for: Characterization of the adaptive immune response of donors receiving live anthrax vaccine
Source: PubMed Central journal article supplement (PMC8687594; doi:10.1371/journal.pone.0260202), 2021-12-20

## The effect of gender on the development of anti-anthrax post-vaccination immunity and the duration of circulation of IgG to PA.

Statistical analysis was performed using a Two-way ANOVA with Tukey's multiple comparison (determination of significance and confidence intervals). The histograms show the mean and the confidence interval as an interval estimate of the general frame.

|                                     | Months after Vaccination |     |      |     | Nonvaccinated |
|-------------------------------------|--------------------------|-----|------|-----|---------------|
|                                     | 1-3                      | 4-8 | 9-11 | >12 |               |
| <b>Titers in the group of men</b>   | 200                      | 800 | 100  | 100 | 100           |
|                                     | 800                      | 400 | 1600 | 50  | 400           |
|                                     | 800                      | 400 | 200  | 50  | 200           |
|                                     | 100                      | 100 | 0    | 200 | 400           |
|                                     | 800                      | 25  | 50   | 0   | 0             |
|                                     | 400                      | 25  | 25   | 0   | 50            |
|                                     | 100                      | 0   | 400  | 25  | 100           |
|                                     | 800                      | 100 | 200  | 0   | 25            |
|                                     | 400                      | 100 |      |     | 50            |
|                                     | 800                      | 0   |      |     | 0             |
| <b>Titers in the group of women</b> | 100                      | 25  | 0    | 50  | 0             |
|                                     | 800                      | 400 | 400  | 100 | 0             |
|                                     | 1600                     | 800 | 50   | 200 | 50            |
|                                     | 1600                     | 400 | 200  | 100 | 200           |
|                                     | 800                      | 25  | 100  | 400 | 400           |
|                                     | 400                      | 100 | 50   | 25  | 0             |
|                                     |                          | 50  | 100  | 100 | 400           |
|                                     |                          | 100 |      | 25  | 100           |
|                                     |                          | 400 |      | 100 | 50            |
|                                     |                          |     |      |     | 25            |
|                                     |                          |     |      |     | 200           |

| <b>Two-Way ANOVA</b>            |                             |                |                        |                     |                |  |
|---------------------------------|-----------------------------|----------------|------------------------|---------------------|----------------|--|
| <b>Table Analyzed</b>           | <b>Gender vs. PA titers</b> |                |                        |                     |                |  |
|                                 |                             |                |                        |                     |                |  |
|                                 | <b>Ordinary</b>             |                |                        |                     |                |  |
| <b>Alpha</b>                    | 0,05                        |                |                        |                     |                |  |
|                                 |                             |                |                        |                     |                |  |
| <b>Source of Variation</b>      | <b>% of total variation</b> | <b>P value</b> | <b>P value summary</b> | <b>Significant?</b> |                |  |
| <b>Interaction</b>              | 5,672                       | 0,1401         | ns                     | No                  |                |  |
| <b>Row Factor</b>               | 35,78                       | < 0,0001       | ****                   | Yes                 |                |  |
| <b>Column Factor</b>            | 0,7036                      | 0,3494         | ns                     | No                  |                |  |
|                                 |                             |                |                        |                     |                |  |
| <b>ANOVA table</b>              | <b>SS</b>                   | <b>DF</b>      | <b>MS</b>              | <b>F (DFn, DFd)</b> | <b>P value</b> |  |
| <b>Interaction</b>              | 605263                      | 4              | 151316                 | F (4, 78) = 1,786   | P = 0,1401     |  |
| <b>Row Factor</b>               | 3818000                     | 4              | 954559                 | F (4, 78) = 11,27   | P < 0,0001     |  |
| <b>Column Factor</b>            | 75084                       | 1              | 75084                  | F (1, 78) = 0,8862  | P = 0,3494     |  |
| <b>Residual</b>                 | 6608000                     | 78             | 84722                  |                     |                |  |
|                                 |                             |                |                        |                     |                |  |
| <b>Number of missing values</b> | 22                          |                |                        |                     |                |  |

| ANOVA Multiple Comparison         |            |                 |              |             |    |    |       |    |
|-----------------------------------|------------|-----------------|--------------|-------------|----|----|-------|----|
|                                   |            |                 |              |             |    |    |       |    |
| Number of families                | 1          |                 |              |             |    |    |       |    |
| Number of comparisons per family  | 10         |                 |              |             |    |    |       |    |
| Alpha                             | 0,05       |                 |              |             |    |    |       |    |
|                                   |            |                 |              |             |    |    |       |    |
| Tukey's multiple comparisons test | Mean Diff, | 95% CI of diff, | Significant? | Summary     |    |    |       |    |
|                                   |            |                 |              |             |    |    |       |    |
| <i>Men</i>                        |            |                 |              |             |    |    |       |    |
| 1-3 vs. 4-8                       | 325        | -38,52 to 688,5 | No           | ns          |    |    |       |    |
| 1-3 vs. 9-12                      | 198,1      | -187,4 to 583,7 | No           | ns          |    |    |       |    |
| 1-3 vs. >12                       | 466,9      | 81,31 to 852,4  | Yes          | **          |    |    |       |    |
| 1-3 vs. Nonvaccinated             | 387,5      | 23,98 to 751,0  | Yes          | *           |    |    |       |    |
| 4-8 vs. 9-12                      | -126,9     | -512,4 to 258,7 | No           | ns          |    |    |       |    |
| 4-8 vs. >12                       | 141,9      | -243,7 to 527,4 | No           | ns          |    |    |       |    |
| 4-8 vs. Nonvaccinated             | 62,5       | -301,0 to 426,0 | No           | ns          |    |    |       |    |
| 9-12 vs. >12                      | 268,8      | -137,7 to 675,2 | No           | ns          |    |    |       |    |
| 9-12 vs. Nonvaccinated            | 189,4      | -196,2 to 574,9 | No           | ns          |    |    |       |    |
| >12 vs. Nonvaccinated             | -79,38     | -464,9 to 306,2 | No           | ns          |    |    |       |    |
|                                   |            |                 |              |             |    |    |       |    |
| <i>Woman</i>                      |            |                 |              |             |    |    |       |    |
| 1-3 vs. 4-8                       | 627,8      | 199,4 to 1056   | Yes          | ***         |    |    |       |    |
| 1-3 vs. 9-12                      | 754,8      | 302,5 to 1207   | Yes          | ***         |    |    |       |    |
| 1-3 vs. >12                       | 761,1      | 332,7 to 1190   | Yes          | ****        |    |    |       |    |
| 1-3 vs. Nonvaccinated             | 753,8      | 341,3 to 1166   | Yes          | ****        |    |    |       |    |
| 4-8 vs. 9-12                      | 127        | -282,7 to 536,6 | No           | ns          |    |    |       |    |
| 4-8 vs. >12                       | 133,3      | -249,8 to 516,5 | No           | ns          |    |    |       |    |
| 4-8 vs. Nonvaccinated             | 126        | -239,3 to 491,4 | No           | ns          |    |    |       |    |
| 9-12 vs. >12                      | 6,349      | -403,3 to 416,0 | No           | ns          |    |    |       |    |
| 9-12 vs. Nonvaccinated            | -0,974     | -394,0 to 392,0 | No           | ns          |    |    |       |    |
| >12 vs. Nonvaccinated             | -7,323     | -372,7 to 358,0 | No           | ns          |    |    |       |    |
|                                   |            |                 |              |             |    |    |       |    |
| Test details                      | Mean 1     | Mean 2          | Mean Diff,   | SE of diff, | N1 | N2 | q     | DF |
|                                   |            |                 |              |             |    |    |       |    |
| <i>Men</i>                        |            |                 |              |             |    |    |       |    |
| 1-3 vs. 4-8                       | 520        | 195             | 325          | 130,2       | 10 | 10 | 3,531 | 78 |
| 1-3 vs. 9-11                      | 520        | 321,9           | 198,1        | 138,1       | 10 | 8  | 2,029 | 78 |
| 1-3 vs. >12                       | 520        | 53,13           | 466,9        | 138,1       | 10 | 8  | 4,782 | 78 |
| 1-3 vs. Nonvaccinated             | 520        | 132,5           | 387,5        | 130,2       | 10 | 10 | 4,21  | 78 |
| 4-8 vs. 9-11                      | 195        | 321,9           | -126,9       | 138,1       | 10 | 8  | 1,3   | 78 |
| 4-8 vs. >12                       | 195        | 53,13           | 141,9        | 138,1       | 10 | 8  | 1,453 | 78 |
| 4-8 vs. Nonvaccinated             | 195        | 132,5           | 62,5         | 130,2       | 10 | 10 | 0,679 | 78 |
| 9-11 vs. >12                      | 321,9      | 53,13           | 268,8        | 145,5       | 8  | 8  | 2,612 | 78 |

|                                 |       |       |        |       |   |    |          |    |
|---------------------------------|-------|-------|--------|-------|---|----|----------|----|
| <b>9-11 vs. Nonvaccinated</b>   | 321,9 | 132,5 | 189,4  | 138,1 | 8 | 10 | 1,94     | 78 |
| <b>&gt;12 vs. Nonvaccinated</b> | 53,13 | 132,5 | -79,38 | 138,1 | 8 | 10 | 0,813    | 78 |
|                                 |       |       |        |       |   |    |          |    |
| <i>Woman</i>                    |       |       |        |       |   |    |          |    |
| <b>1-3 vs. 4-8</b>              | 883,3 | 255,6 | 627,8  | 153,4 | 6 | 9  | 5,787    | 78 |
| <b>1-3 vs. 9-11</b>             | 883,3 | 128,6 | 754,8  | 161,9 | 6 | 7  | 6,591    | 78 |
| <b>1-3 vs. &gt;12</b>           | 883,3 | 122,2 | 761,1  | 153,4 | 6 | 9  | 7,016    | 78 |
| <b>1-3 vs. Nonvaccinated</b>    | 883,3 | 129,5 | 753,8  | 147,7 | 6 | 11 | 7,216    | 78 |
| <b>4-8 vs. 9-11</b>             | 255,6 | 128,6 | 127    | 146,7 | 9 | 7  | 1,224    | 78 |
| <b>4-8 vs. &gt;12</b>           | 255,6 | 122,2 | 133,3  | 137,2 | 9 | 9  | 1,374    | 78 |
| <b>4-8 vs. Nonvaccinated</b>    | 255,6 | 129,5 | 126    | 130,8 | 9 | 11 | 1,362    | 78 |
| <b>9-11 vs. &gt;12</b>          | 128,6 | 122,2 | 6,349  | 146,7 | 7 | 9  | 0,06121  | 78 |
| <b>9-11 vs. Nonvaccinated</b>   | 128,6 | 129,5 | -0,974 | 140,7 | 7 | 11 | 0,009788 | 78 |
| <b>&gt;12 vs. Nonvaccinated</b> | 122,2 | 129,5 | -7,323 | 130,8 | 9 | 11 | 0,07916  | 78 |

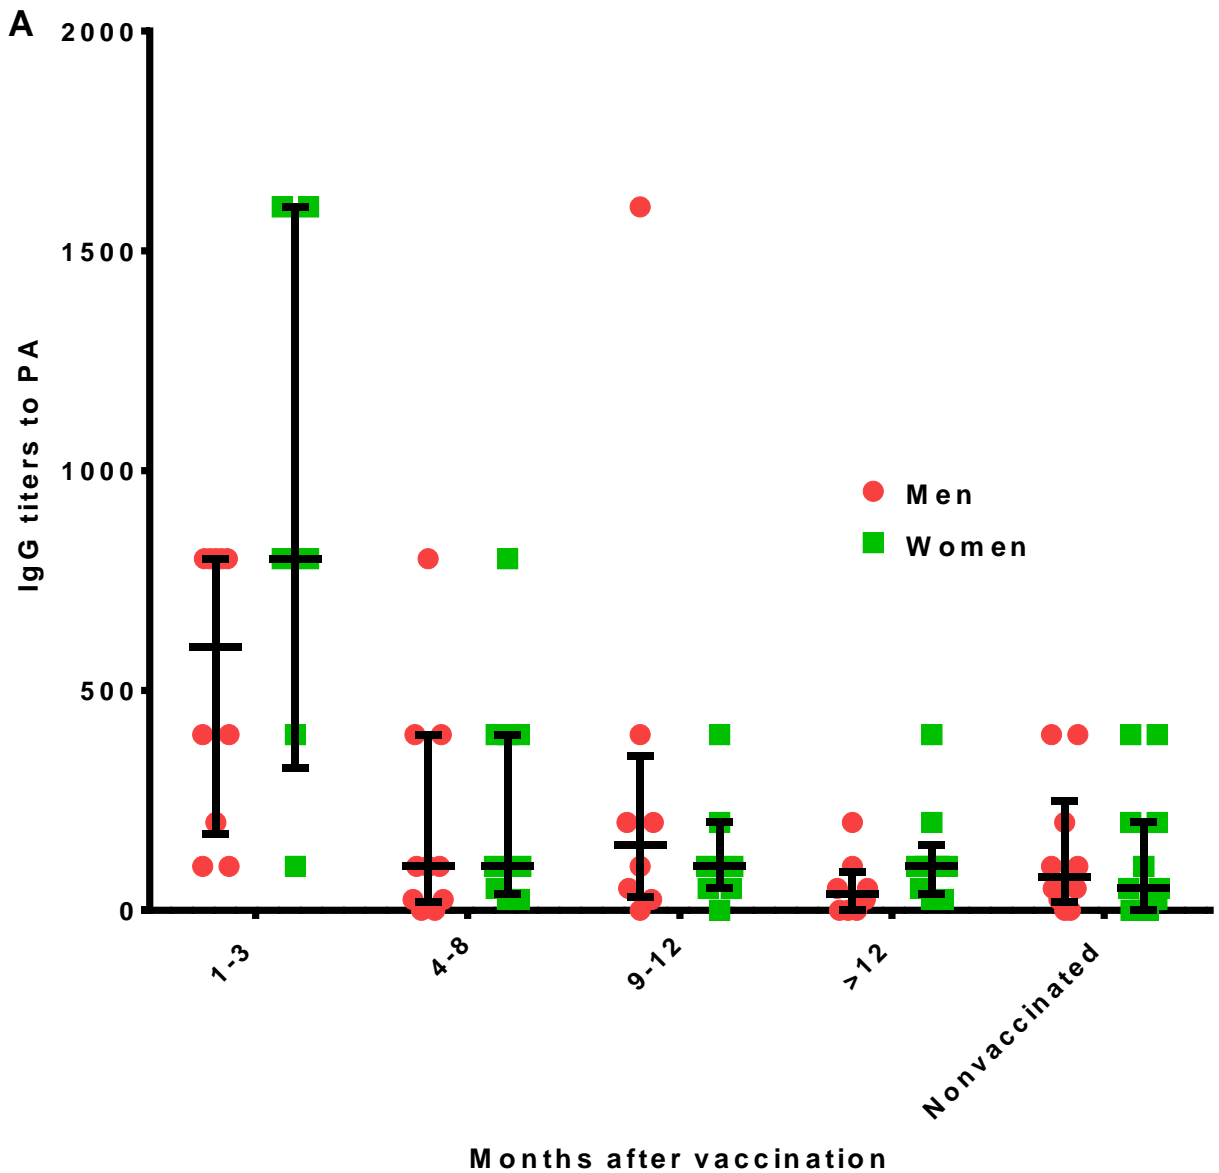

Supplement: pone.0260202.s035.pdf [file pone.0260202.s035.pdf]
