# Supplementary material for: Characterization of the adaptive immune response of donors receiving live anthrax vaccine
Source: PubMed Central journal article supplement (PMC8687594; doi:10.1371/journal.pone.0260202), 2021-12-20

## The effect of gender on the development of anti-anthrax post-vaccination immunity and the duration of circulation of IgG to LF.

Statistical analysis was performed using a Two-way ANOVA with Tukey's multiple comparison (determination of significance and confidence intervals). The histograms show the mean and the confidence interval as an interval estimate of the general frame.

|                                     | Months after Vaccination |      |      |     | Nonvaccinated |
|-------------------------------------|--------------------------|------|------|-----|---------------|
|                                     | 1-3                      | 4-8  | 9-11 | >12 |               |
| <b>Titers in the group of men</b>   | 200                      | 100  | 200  | 0   | 50            |
|                                     | 800                      | 100  | 800  | 0   | 200           |
|                                     | 100                      | 200  | 100  | 0   | 50            |
|                                     | 200                      | 25   | 0    | 0   | 50            |
|                                     | 800                      | 25   | 100  | 25  | 100           |
|                                     | 800                      | 100  | 25   | 50  | 50            |
|                                     | 400                      | 25   | 200  | 25  | 0             |
|                                     | 50                       | 100  | 100  | 25  | 0             |
|                                     | 400                      | 25   |      |     | 0             |
|                                     | 400                      | 400  |      |     | 0             |
| <b>Titers in the group of women</b> | 400                      | 1600 | 0    | 0   | 25            |
|                                     | 400                      | 400  | 400  | 0   | 25            |
|                                     | 800                      | 800  | 400  | 200 | 200           |
|                                     | 800                      | 400  | 200  | 0   | 0             |
|                                     | 100                      | 800  | 100  | 200 | 25            |
|                                     | 400                      | 25   | 0    | 50  | 0             |
|                                     |                          | 25   | 25   | 0   | 0             |
|                                     |                          | 100  |      | 0   | 100           |
|                                     |                          | 400  |      | 25  | 200           |
|                                     |                          |      |      |     | 100           |
|                                     |                          |      |      |     | 0             |

| <b>Two-Way ANOVA</b>            |                             |                |                        |                     |                |  |
|---------------------------------|-----------------------------|----------------|------------------------|---------------------|----------------|--|
| <b>Table Analyzed</b>           | <b>Gender vs. LF titers</b> |                |                        |                     |                |  |
|                                 |                             |                |                        |                     |                |  |
|                                 | <b>Ordinary</b>             |                |                        |                     |                |  |
| <b>Alpha</b>                    | 0,05                        |                |                        |                     |                |  |
|                                 |                             |                |                        |                     |                |  |
| <b>Source of Variation</b>      | <b>% of total variation</b> | <b>P value</b> | <b>P value summary</b> | <b>Significant?</b> |                |  |
| <b>Interaction</b>              | 7,83                        | 0,0449         | *                      | Yes                 |                |  |
| <b>Row Factor</b>               | 29,97                       | < 0,0001       | ****                   | Yes                 |                |  |
| <b>Column Factor</b>            | 2,888                       | 0,0555         | ns                     | No                  |                |  |
|                                 |                             |                |                        |                     |                |  |
| <b>ANOVA table</b>              | <b>SS</b>                   | <b>DF</b>      | <b>MS</b>              | <b>F (DFn, DFd)</b> | <b>P value</b> |  |
| <b>Interaction</b>              | 538226                      | 4              | 134557                 | F (4, 78) = 2,562   | P = 0,0449     |  |
| <b>Row Factor</b>               | 2060000                     | 4              | 515072                 | F (4, 78) = 9,807   | P < 0,0001     |  |
| <b>Column Factor</b>            | 198525                      | 1              | 198525                 | F (1, 78) = 3,780   | P = 0,0555     |  |
| <b>Residual</b>                 | 4097000                     | 78             | 52522                  |                     |                |  |
|                                 |                             |                |                        |                     |                |  |
| <b>Number of missing values</b> | 22                          |                |                        |                     |                |  |

| ANOVA Multiple Comparison         |            |                 |              |             |    |    |        |    |
|-----------------------------------|------------|-----------------|--------------|-------------|----|----|--------|----|
| Number of families                | 1          |                 |              |             |    |    |        |    |
| Number of comparisons per family  | 10         |                 |              |             |    |    |        |    |
| Alpha                             | 0,05       |                 |              |             |    |    |        |    |
| Tukey's multiple comparisons test | Mean Diff, | 95% CI of diff, | Significant? | Summary     |    |    |        |    |
| <i>Men</i>                        |            |                 |              |             |    |    |        |    |
| 1-3 vs. 4-8                       | 305        | 18,78 to 591,2  | Yes          | *           |    |    |        |    |
| 1-3 vs. 9-12                      | 224,4      | -79,21 to 528,0 | No           | ns          |    |    |        |    |
| 1-3 vs. >12                       | 399,4      | 95,79 to 703,0  | Yes          | **          |    |    |        |    |
| 1-3 vs. Nonvaccinated             | 365        | 78,78 to 651,2  | Yes          | **          |    |    |        |    |
| 4-8 vs. 9-12                      | -80,63     | -384,2 to 223,0 | No           | ns          |    |    |        |    |
| 4-8 vs. >12                       | 94,38      | -209,2 to 398,0 | No           | ns          |    |    |        |    |
| 4-8 vs. Nonvaccinated             | 60         | -226,2 to 346,2 | No           | ns          |    |    |        |    |
| 9-12 vs. >12                      | 175        | -145,0 to 495,0 | No           | ns          |    |    |        |    |
| 9-12 vs. Nonvaccinated            | 140,6      | -163,0 to 444,2 | No           | ns          |    |    |        |    |
| >12 vs. Nonvaccinated             | -34,38     | -338,0 to 269,2 | No           | ns          |    |    |        |    |
| <i>Women</i>                      |            |                 |              |             |    |    |        |    |
| 1-3 vs. 4-8                       | -22,22     | -359,5 to 315,1 | No           | ns          |    |    |        |    |
| 1-3 vs. 9-12                      | 322,6      | -33,45 to 678,7 | No           | ns          |    |    |        |    |
| 1-3 vs. >12                       | 430,6      | 93,24 to 767,9  | Yes          | **          |    |    |        |    |
| 1-3 vs. Nonvaccinated             | 422        | 97,16 to 746,8  | Yes          | **          |    |    |        |    |
| 4-8 vs. 9-12                      | 344,8      | 22,31 to 667,4  | Yes          | *           |    |    |        |    |
| 4-8 vs. >12                       | 452,8      | 151,1 to 754,5  | Yes          | ***         |    |    |        |    |
| 4-8 vs. Nonvaccinated             | 444,2      | 156,5 to 731,9  | Yes          | ***         |    |    |        |    |
| 9-12 vs. >12                      | 107,9      | -214,6 to 430,5 | No           | ns          |    |    |        |    |
| 9-12 vs. Nonvaccinated            | 99,35      | -210,1 to 408,8 | No           | ns          |    |    |        |    |
| >12 vs. Nonvaccinated             | -8,586     | -296,2 to 279,1 | No           | ns          |    |    |        |    |
| Test details                      | Mean 1     | Mean 2          | Mean Diff,   | SE of diff, | N1 | N2 | q      | DF |
| <i>Men</i>                        |            |                 |              |             |    |    |        |    |
| 1-3 vs. 4-8                       | 415        | 110             | 305          | 102,5       | 10 | 10 | 4,209  | 78 |
| 1-3 vs. 9-11                      | 415        | 190,6           | 224,4        | 108,7       | 10 | 8  | 2,919  | 78 |
| 1-3 vs. >12                       | 415        | 15,63           | 399,4        | 108,7       | 10 | 8  | 5,196  | 78 |
| 1-3 vs. Nonvaccinated             | 415        | 50              | 365          | 102,5       | 10 | 10 | 5,036  | 78 |
| 4-8 vs. 9-11                      | 110        | 190,6           | -80,63       | 108,7       | 10 | 8  | 1,049  | 78 |
| 4-8 vs. >12                       | 110        | 15,63           | 94,38        | 108,7       | 10 | 8  | 1,228  | 78 |
| 4-8 vs. Nonvaccinated             | 110        | 50              | 60           | 102,5       | 10 | 10 | 0,8279 | 78 |
| 9-11 vs. >12                      | 190,6      | 15,63           | 175          | 114,6       | 8  | 8  | 2,16   | 78 |

|                                 |       |       |        |       |   |    |        |    |
|---------------------------------|-------|-------|--------|-------|---|----|--------|----|
| <b>9-11 vs. Nonvaccinated</b>   | 190,6 | 50    | 140,6  | 108,7 | 8 | 10 | 1,829  | 78 |
| <b>&gt;12 vs. Nonvaccinated</b> | 15,63 | 50    | -34,38 | 108,7 | 8 | 10 | 0,4472 | 78 |
| <i>Women</i>                    |       |       |        |       |   |    |        |    |
| <b>1-3 vs. 4-8</b>              | 483,3 | 505,6 | -22,22 | 120,8 | 6 | 9  | 0,2602 | 78 |
| <b>1-3 vs. 9-11</b>             | 483,3 | 160,7 | 322,6  | 127,5 | 6 | 7  | 3,578  | 78 |
| <b>1-3 vs. &gt;12</b>           | 483,3 | 52,78 | 430,6  | 120,8 | 6 | 9  | 5,041  | 78 |
| <b>1-3 vs. Nonvaccinated</b>    | 483,3 | 61,36 | 422    | 116,3 | 6 | 11 | 5,131  | 78 |
| <b>4-8 vs. 9-11</b>             | 505,6 | 160,7 | 344,8  | 115,5 | 9 | 7  | 4,223  | 78 |
| <b>4-8 vs. &gt;12</b>           | 505,6 | 52,78 | 452,8  | 108   | 9 | 9  | 5,927  | 78 |
| <b>4-8 vs. Nonvaccinated</b>    | 505,6 | 61,36 | 444,2  | 103   | 9 | 11 | 6,098  | 78 |
| <b>9-11 vs. &gt;12</b>          | 160,7 | 52,78 | 107,9  | 115,5 | 7 | 9  | 1,322  | 78 |
| <b>9-11 vs. Nonvaccinated</b>   | 160,7 | 61,36 | 99,35  | 110,8 | 7 | 11 | 1,268  | 78 |
| <b>&gt;12 vs. Nonvaccinated</b> | 52,78 | 61,36 | -8,586 | 103   | 9 | 11 | 0,1179 | 78 |

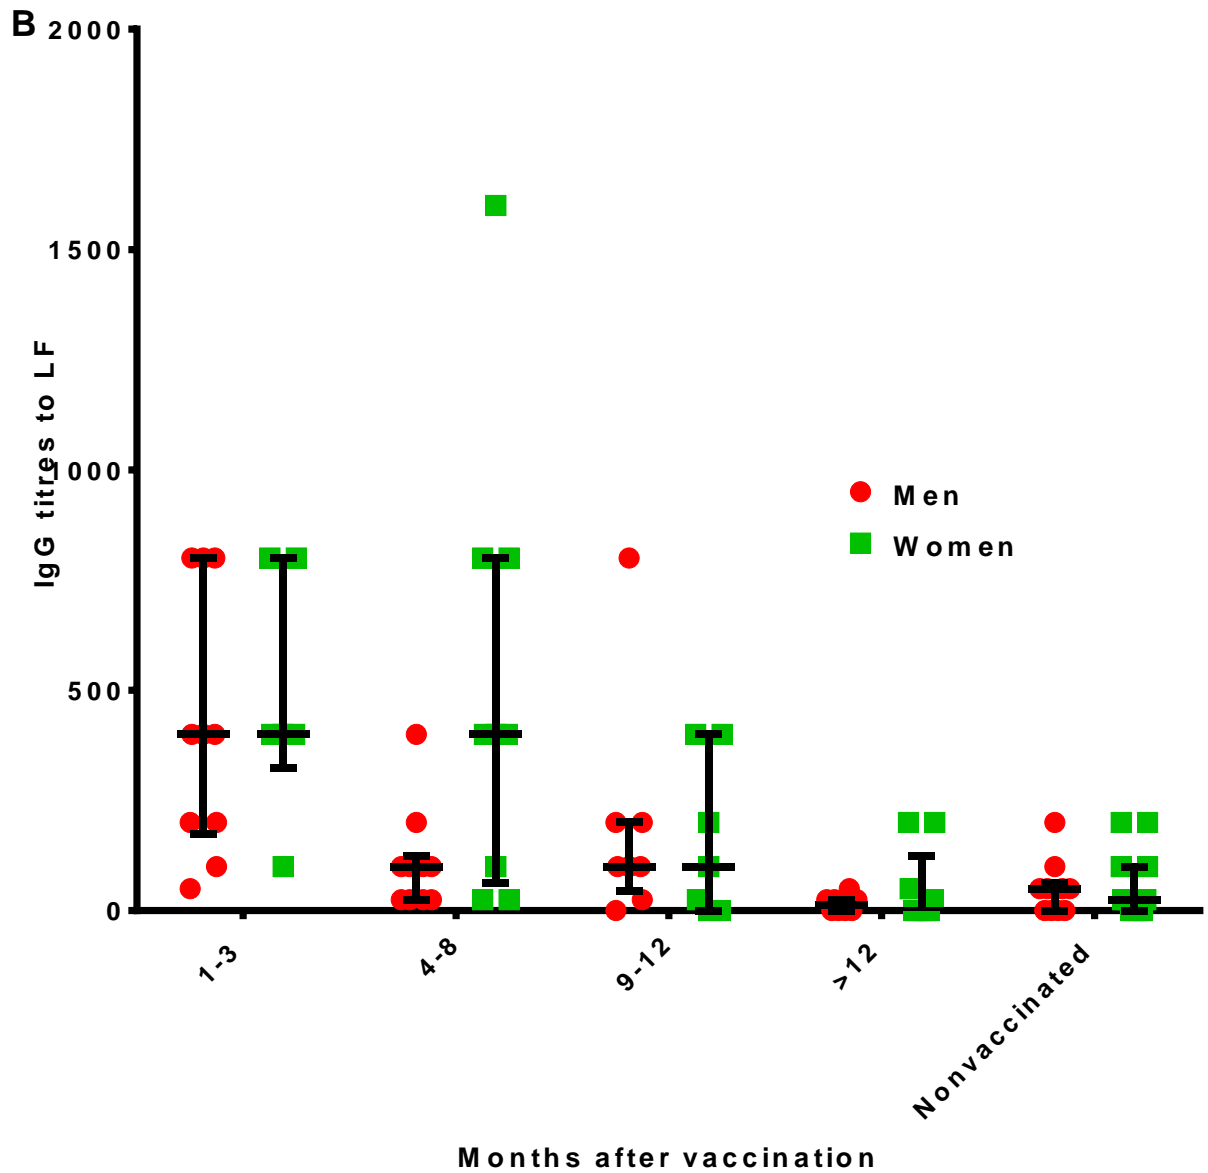

Supplement: pone.0260202.s036.pdf [file pone.0260202.s036.pdf]
