# Supplementary material for: Characterization of the adaptive immune response of donors receiving live anthrax vaccine
Source: PubMed Central journal article supplement (PMC8687594; doi:10.1371/journal.pone.0260202), 2021-12-20

## **The effect of gender on the development of anti-anthrax post-vaccination immunity and the duration of circulation of IgG to spores.**

Statistical analysis was performed using a Two-way ANOVA with Tukey's multiple comparison (determination of significance and confidence intervals). The histograms show the mean and the confidence interval as an interval estimate of the general frame.

|                                     | <b>Months after Vaccination</b> |            |             |               | <b>Nonvaccinated</b> |
|-------------------------------------|---------------------------------|------------|-------------|---------------|----------------------|
|                                     | <b>1-3</b>                      | <b>4-8</b> | <b>9-11</b> | <b>&gt;12</b> |                      |
| <b>Titers in the group of men</b>   | 200                             | 200        | 400         | 100           | 200                  |
|                                     | 1600                            | 400        | 800         | 200           | 0                    |
|                                     | 400                             | 400        | 400         | 400           | 50                   |
|                                     | 800                             | 800        | 0           | 200           | 100                  |
|                                     | 1600                            | 100        | 25          | 200           | 800                  |
|                                     | 800                             | 100        | 100         | 400           | 400                  |
|                                     | 800                             | 50         | 200         | 200           | 50                   |
|                                     | 400                             | 400        | 400         | 0             | 50                   |
|                                     | 400                             | 200        |             |               | 60                   |
|                                     | 3200                            | 400        |             |               | 25                   |
| <b>Titers in the group of women</b> | 200                             | 1600       | 0           | 200           | 100                  |
|                                     | 1600                            | 800        | 200         | 200           | 0                    |
|                                     | 3200                            | 1600       | 100         | 1600          | 200                  |
|                                     | 1600                            | 3200       | 200         | 200           | 50                   |
|                                     | 800                             | 200        | 200         | 800           | 0                    |
|                                     | 1600                            | 200        | 50          | 400           | 0                    |
|                                     |                                 | 400        | 100         | 0             | 100                  |
|                                     |                                 | 200        |             | 200           | 25                   |
|                                     |                                 | 800        |             | 0             | 0                    |
|                                     |                                 |            |             |               | 100                  |
|                                     |                                 |            |             |               | 0                    |

| <b>Two-Way ANOVA</b>            |                                 |                |                        |                     |                |  |
|---------------------------------|---------------------------------|----------------|------------------------|---------------------|----------------|--|
| <b>Table Analyzed</b>           | <b>Gender vs. Spores titers</b> |                |                        |                     |                |  |
|                                 |                                 |                |                        |                     |                |  |
|                                 | <b>Ordinary</b>                 |                |                        |                     |                |  |
| <b>Alpha</b>                    | 0,05                            |                |                        |                     |                |  |
|                                 |                                 |                |                        |                     |                |  |
| <b>Source of Variation</b>      | <b>% of total variation</b>     | <b>P value</b> | <b>P value summary</b> | <b>Significant?</b> |                |  |
| <b>Interaction</b>              | 6,108                           | 0,1011         | ns                     | No                  |                |  |
| <b>Row Factor</b>               | 34,61                           | < 0,0001       | ****                   | Yes                 |                |  |
| <b>Column Factor</b>            | 2,401                           | 0,0792         | ns                     | No                  |                |  |
|                                 |                                 |                |                        |                     |                |  |
| <b>ANOVA table</b>              | <b>SS</b>                       | <b>DF</b>      | <b>MS</b>              | <b>F (DFn, DFd)</b> | <b>P value</b> |  |
| <b>Interaction</b>              | 2,498e+006                      | 4              | 624388                 | F (4, 78) = 2,011   | P = 0,1011     |  |
| <b>Row Factor</b>               | 1,415e+007                      | 4              | 3,538e+006             | F (4, 78) = 11,40   | P < 0,0001     |  |
| <b>Column Factor</b>            | 981953                          | 1              | 981953                 | F (1, 78) = 3,163   | P = 0,0792     |  |
| <b>Residual</b>                 | 2,422e+007                      | 78             | 310479                 |                     |                |  |
|                                 |                                 |                |                        |                     |                |  |
| <b>Number of missing values</b> | 22                              |                |                        |                     |                |  |

| ANOVA Multiple Comparison         |            |                 |              |             |    |    |         |    |
|-----------------------------------|------------|-----------------|--------------|-------------|----|----|---------|----|
| Number of families                | 1          |                 |              |             |    |    |         |    |
| Number of comparisons per family  | 10         |                 |              |             |    |    |         |    |
| Alpha                             | 0,05       |                 |              |             |    |    |         |    |
|                                   |            |                 |              |             |    |    |         |    |
| Tukey's multiple comparisons test | Mean Diff, | 95% CI of diff, | Significant? | Summary     |    |    |         |    |
|                                   |            |                 |              |             |    |    |         |    |
| <i>Men</i>                        |            |                 |              |             |    |    |         |    |
| 1-3 vs. 4-8                       | 715,0      | 19,11 to 1411   | Yes          | *           |    |    |         |    |
| 1-3 vs. 9-12                      | 729,4      | -8,730 to 1467  | No           | ns          |    |    |         |    |
| 1-3 vs. >12                       | 807,5      | 69,39 to 1546   | Yes          | *           |    |    |         |    |
| 1-3 vs. Nonvaccinated             | 847,5      | 151,6 to 1543   | Yes          | **          |    |    |         |    |
| 4-8 vs. 9-12                      | 14,38      | -723,7 to 752,5 | No           | ns          |    |    |         |    |
| 4-8 vs. >12                       | 92,50      | -645,6 to 830,6 | No           | ns          |    |    |         |    |
| 4-8 vs. Nonvaccinated             | 132,5      | -563,4 to 828,4 | No           | ns          |    |    |         |    |
| 9-12 vs. >12                      | 78,13      | -699,9 to 856,2 | No           | ns          |    |    |         |    |
| 9-12 vs. Nonvaccinated            | 118,1      | -620,0 to 856,2 | No           | ns          |    |    |         |    |
| >12 vs. Nonvaccinated             | 40,00      | -698,1 to 778,1 | No           | ns          |    |    |         |    |
|                                   |            |                 |              |             |    |    |         |    |
| <i>Woman</i>                      |            |                 |              |             |    |    |         |    |
| 1-3 vs. 4-8                       | 500,0      | -320,1 to 1320  | No           | ns          |    |    |         |    |
| 1-3 vs. 9-12                      | 1379       | 512,9 to 2244   | Yes          | ***         |    |    |         |    |
| 1-3 vs. >12                       | 1100       | 279,9 to 1920   | Yes          | **          |    |    |         |    |
| 1-3 vs. Nonvaccinated             | 1448       | 658,0 to 2237   | Yes          | ****        |    |    |         |    |
| 4-8 vs. 9-12                      | 878,6      | 94,39 to 1663   | Yes          | *           |    |    |         |    |
| 4-8 vs. >12                       | 600,0      | -133,5 to 1334  | No           | ns          |    |    |         |    |
| 4-8 vs. Nonvaccinated             | 947,7      | 248,3 to 1647   | Yes          | **          |    |    |         |    |
| 9-12 vs. >12                      | -278,6     | -1063 to 505,6  | No           | ns          |    |    |         |    |
| 9-12 vs. Nonvaccinated            | 69,16      | -683,2 to 821,5 | No           | ns          |    |    |         |    |
| >12 vs. Nonvaccinated             | 347,7      | -351,7 to 1047  | No           | ns          |    |    |         |    |
|                                   |            |                 |              |             |    |    |         |    |
| Test details                      | Mean 1     | Mean 2          | Mean Diff,   | SE of diff, | N1 | N2 | q       | DF |
|                                   |            |                 |              |             |    |    |         |    |
| <i>Men</i>                        |            |                 |              |             |    |    |         |    |
| 1-3 vs. 4-8                       | 1020       | 305,0           | 715,0        | 249,2       | 10 | 10 | 4,058   | 78 |
| 1-3 vs. 9-11                      | 1020       | 290,6           | 729,4        | 264,3       | 10 | 8  | 3,903   | 78 |
| 1-3 vs. >12                       | 1020       | 212,5           | 807,5        | 264,3       | 10 | 8  | 4,321   | 78 |
| 1-3 vs. Nonvaccinated             | 1020       | 172,5           | 847,5        | 249,2       | 10 | 10 | 4,810   | 78 |
| 4-8 vs. 9-11                      | 305,0      | 290,6           | 14,38        | 264,3       | 10 | 8  | 0,07692 | 78 |
| 4-8 vs. >12                       | 305,0      | 212,5           | 92,50        | 264,3       | 10 | 8  | 0,4949  | 78 |
| 4-8 vs. Nonvaccinated             | 305,0      | 172,5           | 132,5        | 249,2       | 10 | 10 | 0,7520  | 78 |
| 9-11 vs. >12                      | 290,6      | 212,5           | 78,13        | 278,6       | 8  | 8  | 0,3966  | 78 |

|                        |       |       |        |       |   |    |        |    |
|------------------------|-------|-------|--------|-------|---|----|--------|----|
| 9-11 vs. Nonvaccinated | 290,6 | 172,5 | 118,1  | 264,3 | 8 | 10 | 0,6320 | 78 |
| >12 vs. Nonvaccinated  | 212,5 | 172,5 | 40,00  | 264,3 | 8 | 10 | 0,2140 | 78 |
|                        |       |       |        |       |   |    |        |    |
| <i>Woman</i>           |       |       |        |       |   |    |        |    |
| 1-3 vs. 4-8            | 1500  | 1000  | 500,0  | 293,7 | 6 | 9  | 2,408  | 78 |
| 1-3 vs. 9-11           | 1500  | 121,4 | 1379   | 310,0 | 6 | 7  | 6,289  | 78 |
| 1-3 vs. >12            | 1500  | 400,0 | 1100   | 293,7 | 6 | 9  | 5,297  | 78 |
| 1-3 vs. Nonvaccinated  | 1500  | 52,27 | 1448   | 282,8 | 6 | 11 | 7,240  | 78 |
| 4-8 vs. 9-11           | 1000  | 121,4 | 878,6  | 280,8 | 9 | 7  | 4,425  | 78 |
| 4-8 vs. >12            | 1000  | 400,0 | 600,0  | 262,7 | 9 | 9  | 3,230  | 78 |
| 4-8 vs. Nonvaccinated  | 1000  | 52,27 | 947,7  | 250,4 | 9 | 11 | 5,352  | 78 |
| 9-11 vs. >12           | 121,4 | 400,0 | -278,6 | 280,8 | 7 | 9  | 1,403  | 78 |
| 9-11 vs. Nonvaccinated | 121,4 | 52,27 | 69,16  | 269,4 | 7 | 11 | 0,3630 | 78 |
| >12 vs. Nonvaccinated  | 400,0 | 52,27 | 347,7  | 250,4 | 9 | 11 | 1,964  | 78 |

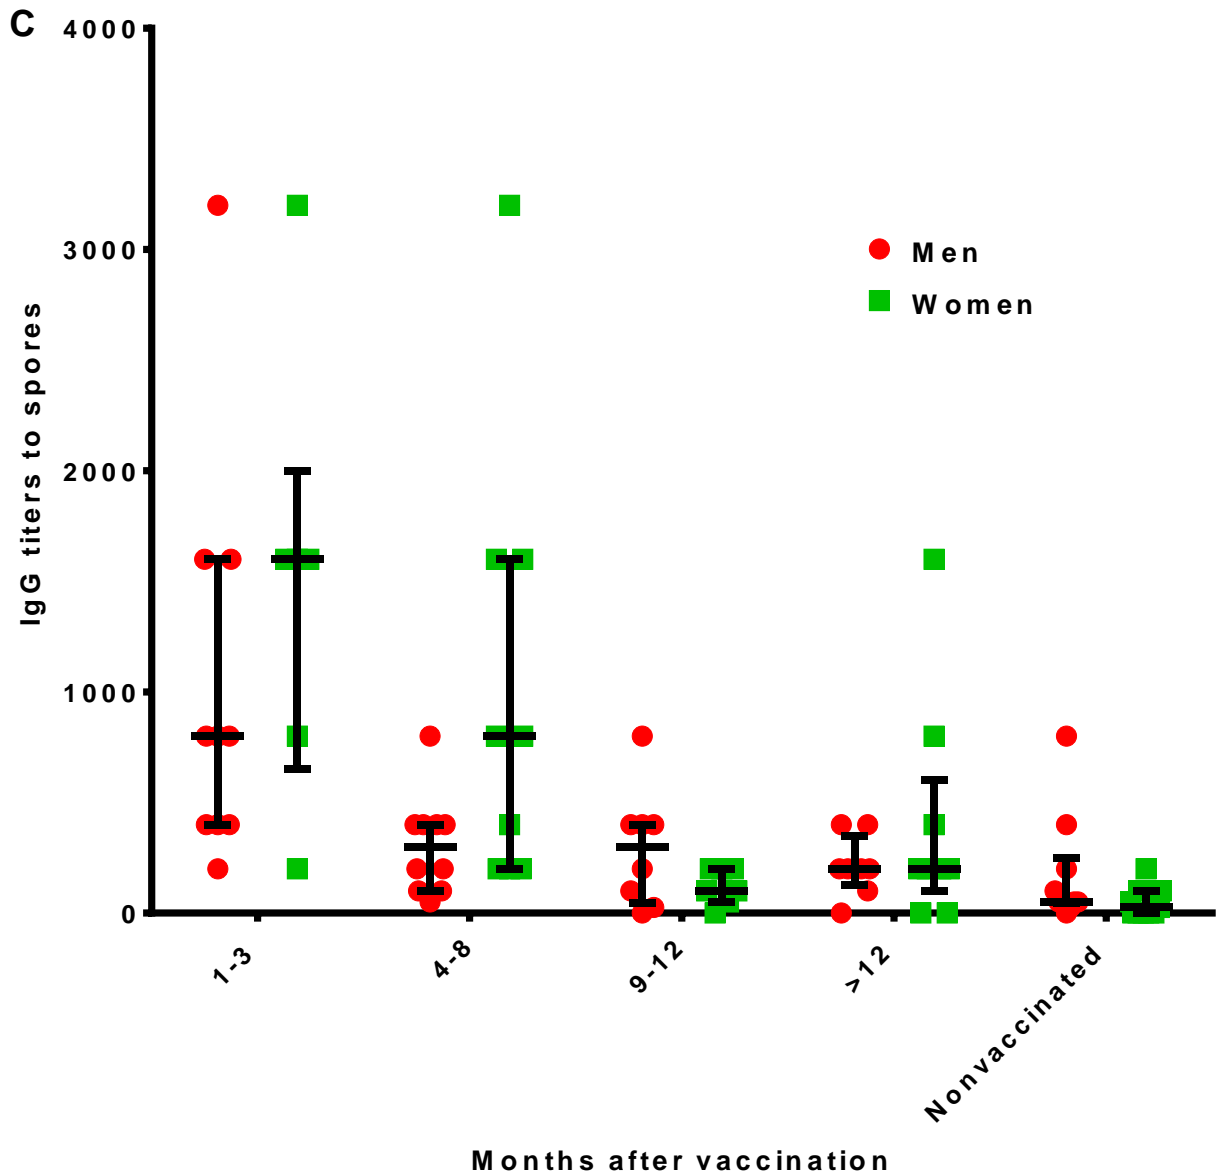

Supplement: pone.0260202.s037.pdf [file pone.0260202.s037.pdf]
