# Supplementary material for: Characterization of the adaptive immune response of donors receiving live anthrax vaccine
Source: PubMed Central journal article supplement (PMC8687594; doi:10.1371/journal.pone.0260202), 2021-12-20

## The effect of gender on the development of anti-anthrax post-vaccination immunity and TNA.

Statistical analysis was performed using a Two-way ANOVA with Tukey's multiple comparison (determination of significance and confidence intervals). The histograms show the mean and the confidence interval as an interval estimate of the general frame.

|                                                   | Months after Vaccination |     |      |     | Nonvaccinated |
|---------------------------------------------------|--------------------------|-----|------|-----|---------------|
|                                                   | 1-3                      | 4-8 | 9-11 | >12 |               |
| <b>TNA in the group of men<br/>Viability, %</b>   | 32                       | 21  | 26   | 40  | 23            |
|                                                   | 41                       | 27  | 79   | 31  | 12            |
|                                                   | 49                       | 66  | 44   | 12  | 17            |
|                                                   | 51                       | 20  | 14   | 48  | 14            |
|                                                   | 73                       | 35  | 51   | 21  | 21            |
|                                                   | 70                       | 37  | 41   | 5   | 12            |
|                                                   | 30                       | 34  | 42   | 30  | 10            |
|                                                   | 23                       | 19  | 57   | 26  | 16            |
|                                                   | 44                       | 33  |      |     | 9             |
|                                                   | 54                       | 43  |      |     | 17            |
| <b>TNA in the group of women<br/>Viability, %</b> | 39                       | 39  | 12   | 28  | 14            |
|                                                   | 60                       | 40  | 39   | 29  | 8             |
|                                                   | 51                       | 45  | 40   | 25  | 12            |
|                                                   | 44                       | 42  | 37   | 26  | 9             |
|                                                   | 28                       | 30  | 17   | 58  | 7             |
|                                                   | 37                       | 23  | 37   | 26  | 14            |
|                                                   |                          | 53  | 29   | 14  | 7             |
|                                                   |                          | 17  |      | 43  | 12            |
|                                                   |                          | 51  |      | 70  | 12            |
|                                                   |                          |     |      |     | 11            |
|                                                   |                          |     |      |     | 9             |

| <b>Two-Way ANOVA</b>            |                             |                |                        |                     |                |  |
|---------------------------------|-----------------------------|----------------|------------------------|---------------------|----------------|--|
| <b>Table Analyzed</b>           | <b>Gender vs. TNA</b>       |                |                        |                     |                |  |
|                                 |                             |                |                        |                     |                |  |
|                                 | <b>Ordinary</b>             |                |                        |                     |                |  |
| <b>Alpha</b>                    | 0,05                        |                |                        |                     |                |  |
|                                 |                             |                |                        |                     |                |  |
| <b>Source of Variation</b>      | <b>% of total variation</b> | <b>P value</b> | <b>P value summary</b> | <b>Significant?</b> |                |  |
| <b>Interaction</b>              | 4,649                       | 0,1461         | ns                     | No                  |                |  |
| <b>Row Factor</b>               | 41,52                       | < 0,0001       | ****                   | Yes                 |                |  |
| <b>Column Factor</b>            | 0,2352                      | 0,5528         | ns                     | No                  |                |  |
|                                 |                             |                |                        |                     |                |  |
| <b>ANOVA table</b>              | <b>SS</b>                   | <b>DF</b>      | <b>MS</b>              | <b>F (DFn, DFd)</b> | <b>P value</b> |  |
| <b>Interaction</b>              | 1224                        | 4              | 306,0                  | F (4, 78) = 1,757   | P = 0,1461     |  |
| <b>Row Factor</b>               | 10931                       | 4              | 2733                   | F (4, 78) = 15,69   | P < 0,0001     |  |
| <b>Column Factor</b>            | 61,91                       | 1              | 61,91                  | F (1, 78) = 0,3554  | P = 0,5528     |  |
| <b>Residual</b>                 | 13588                       | 78             | 174,2                  |                     |                |  |
|                                 |                             |                |                        |                     |                |  |
| <b>Number of missing values</b> | 22                          |                |                        |                     |                |  |

| ANOVA Multiple Comparison         |            |                  |              |             |    |    |        |    |
|-----------------------------------|------------|------------------|--------------|-------------|----|----|--------|----|
| Number of families                | 1          |                  |              |             |    |    |        |    |
| Number of comparisons per family  | 10         |                  |              |             |    |    |        |    |
| Alpha                             | 0,05       |                  |              |             |    |    |        |    |
| Tukey's multiple comparisons test | Mean Diff, | 95% CI of diff,  | Significant? | Summary     |    |    |        |    |
| <i>Men</i>                        |            |                  |              |             |    |    |        |    |
| 1-3 vs. 4-8                       | 13,12      | -3,359 to 29,61  | No           | ns          |    |    |        |    |
| 1-3 vs. 9-12                      | 2,533      | -14,95 to 20,02  | No           | ns          |    |    |        |    |
| 1-3 vs. >12                       | 20,04      | 2,555 to 37,52   | Yes          | *           |    |    |        |    |
| 1-3 vs. Nonvaccinated             | 31,67      | 15,19 to 48,16   | Yes          | ****        |    |    |        |    |
| 4-8 vs. 9-12                      | -10,59     | -28,07 to 6,892  | No           | ns          |    |    |        |    |
| 4-8 vs. >12                       | 6,914      | -10,57 to 24,40  | No           | ns          |    |    |        |    |
| 4-8 vs. Nonvaccinated             | 18,55      | 2,065 to 35,03   | Yes          | *           |    |    |        |    |
| 9-12 vs. >12                      | 17,51      | -0,9238 to 35,93 | No           | ns          |    |    |        |    |
| 9-12 vs. Nonvaccinated            | 29,14      | 11,66 to 46,62   | Yes          | ***         |    |    |        |    |
| >12 vs. Nonvaccinated             | 11,63      | -5,849 to 29,12  | No           | ns          |    |    |        |    |
| <i>Woman</i>                      |            |                  |              |             |    |    |        |    |
| 1-3 vs. 4-8                       | 5,540      | -13,89 to 24,97  | No           | ns          |    |    |        |    |
| 1-3 vs. 9-12                      | 12,95      | -7,560 to 33,45  | No           | ns          |    |    |        |    |
| 1-3 vs. >12                       | 7,931      | -11,49 to 27,36  | No           | ns          |    |    |        |    |
| 1-3 vs. Nonvaccinated             | 32,87      | 14,16 to 51,57   | Yes          | ****        |    |    |        |    |
| 4-8 vs. 9-12                      | 7,406      | -11,17 to 25,98  | No           | ns          |    |    |        |    |
| 4-8 vs. >12                       | 2,391      | -14,98 to 19,77  | No           | ns          |    |    |        |    |
| 4-8 vs. Nonvaccinated             | 27,33      | 10,76 to 43,89   | Yes          | ***         |    |    |        |    |
| 9-12 vs. >12                      | -5,015     | -23,59 to 13,56  | No           | ns          |    |    |        |    |
| 9-12 vs. Nonvaccinated            | 19,92      | 2,101 to 37,74   | Yes          | *           |    |    |        |    |
| >12 vs. Nonvaccinated             | 24,94      | 8,370 to 41,50   | Yes          | ***         |    |    |        |    |
| Test details                      | Mean 1     | Mean 2           | Mean Diff,   | SE of diff, | N1 | N2 | q      | DF |
| <i>Men</i>                        |            |                  |              |             |    |    |        |    |
| 1-3 vs. 4-8                       | 46,60      | 33,47            | 13,12        | 5,903       | 10 | 10 | 3,145  | 78 |
| 1-3 vs. 9-11                      | 46,60      | 44,06            | 2,533        | 6,261       | 10 | 8  | 0,5723 | 78 |
| 1-3 vs. >12                       | 46,60      | 26,56            | 20,04        | 6,261       | 10 | 8  | 4,527  | 78 |
| 1-3 vs. Nonvaccinated             | 46,60      | 14,92            | 31,67        | 5,903       | 10 | 10 | 7,589  | 78 |
| 4-8 vs. 9-11                      | 33,47      | 44,06            | -10,59       | 6,261       | 10 | 8  | 2,392  | 78 |
| 4-8 vs. >12                       | 33,47      | 26,56            | 6,914        | 6,261       | 10 | 8  | 1,562  | 78 |
| 4-8 vs. Nonvaccinated             | 33,47      | 14,92            | 18,55        | 5,903       | 10 | 10 | 4,444  | 78 |
| 9-11 vs. >12                      | 44,06      | 26,56            | 17,51        | 6,599       | 8  | 8  | 3,751  | 78 |

|                        |       |       |        |       |   |    |        |    |
|------------------------|-------|-------|--------|-------|---|----|--------|----|
| 9-11 vs. Nonvaccinated | 44,06 | 14,92 | 29,14  | 6,261 | 8 | 10 | 6,583  | 78 |
| >12 vs. Nonvaccinated  | 26,56 | 14,92 | 11,63  | 6,261 | 8 | 10 | 2,628  | 78 |
|                        |       |       |        |       |   |    |        |    |
| <i>Woman</i>           |       |       |        |       |   |    |        |    |
| 1-3 vs. 4-8            | 43,28 | 37,74 | 5,540  | 6,956 | 6 | 9  | 1,126  | 78 |
| 1-3 vs. 9-11           | 43,28 | 30,33 | 12,95  | 7,343 | 6 | 7  | 2,493  | 78 |
| 1-3 vs. >12            | 43,28 | 35,34 | 7,931  | 6,956 | 6 | 9  | 1,612  | 78 |
| 1-3 vs. Nonvaccinated  | 43,28 | 10,41 | 32,87  | 6,698 | 6 | 11 | 6,939  | 78 |
| 4-8 vs. 9-11           | 37,74 | 30,33 | 7,406  | 6,651 | 9 | 7  | 1,575  | 78 |
| 4-8 vs. >12            | 37,74 | 35,34 | 2,391  | 6,222 | 9 | 9  | 0,5435 | 78 |
| 4-8 vs. Nonvaccinated  | 37,74 | 10,41 | 27,33  | 5,932 | 9 | 11 | 6,515  | 78 |
| 9-11 vs. >12           | 30,33 | 35,34 | -5,015 | 6,651 | 7 | 9  | 1,066  | 78 |
| 9-11 vs. Nonvaccinated | 30,33 | 10,41 | 19,92  | 6,381 | 7 | 11 | 4,415  | 78 |
| >12 vs. Nonvaccinated  | 35,34 | 10,41 | 24,94  | 5,932 | 9 | 11 | 5,945  | 78 |

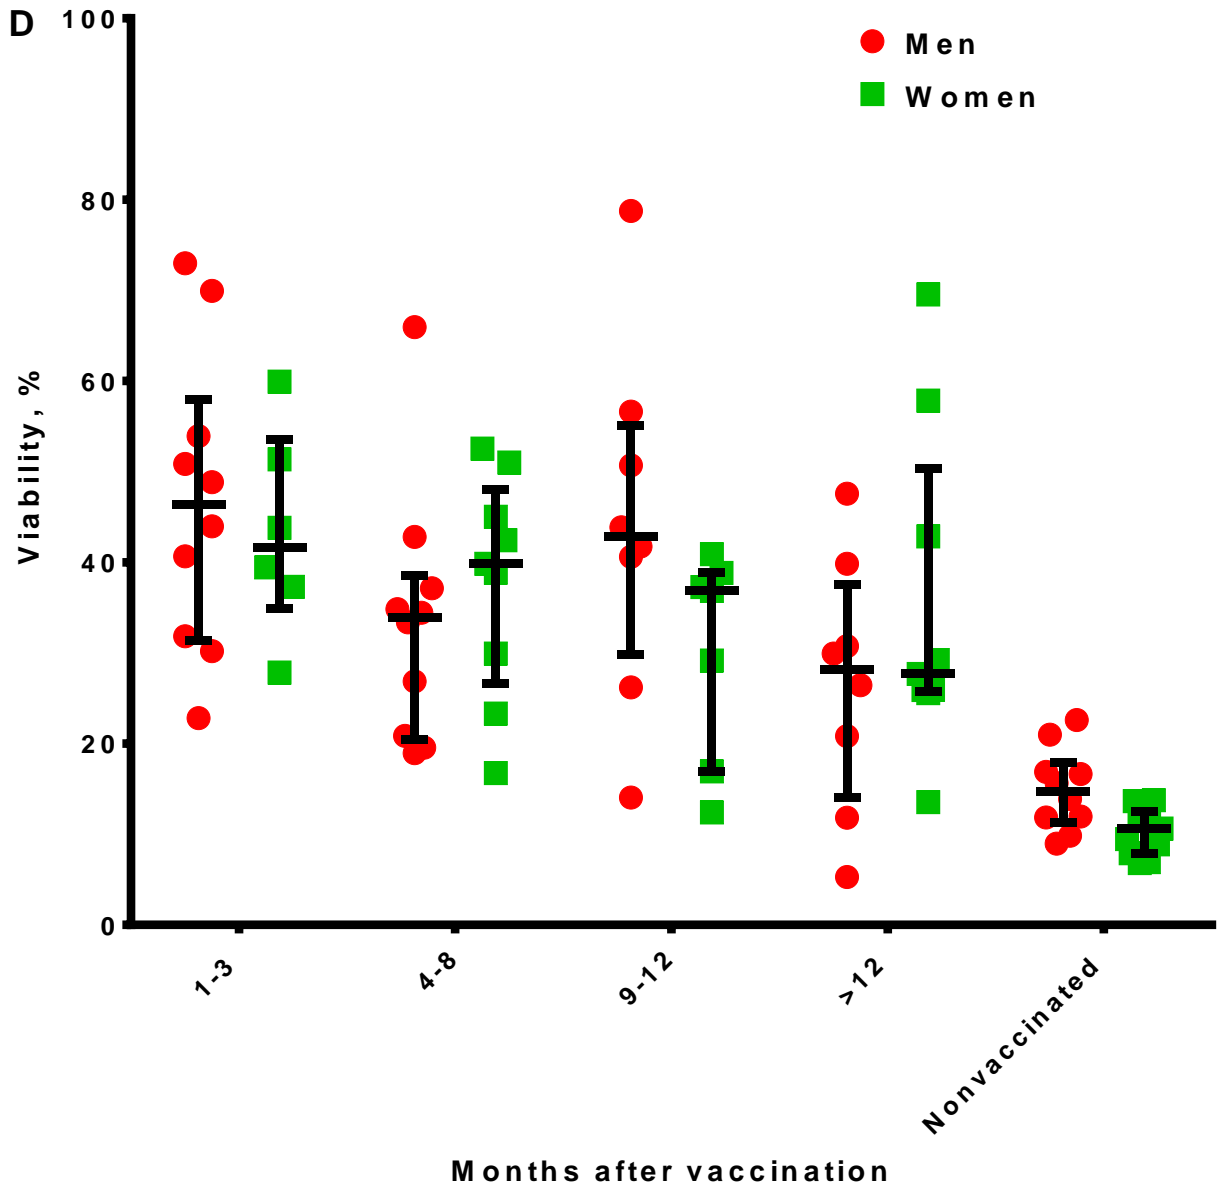

Supplement: pone.0260202.s038.pdf [file pone.0260202.s038.pdf]
