# Supplementary material for: Characterization of the adaptive immune response of donors receiving live anthrax vaccine
Source: PubMed Central journal article supplement (PMC8687594; doi:10.1371/journal.pone.0260202), 2021-12-20
Supplement: pone.0260202.s001.pdf [file pone.0260202.s001.pdf]

TCTCGATCCCGCGAAATTAATACGACTCACTATAGGGGAATTGTGAGCGGATAACAATTCCCCTCTAGAA  
ATAATTTTGTTTAACTTTAAGAAGGAGATATACATATGTCCCCTATACTAGGTTATTGGAAAATTAAGGG  
CCTTGTGCAACCCACTCGACTTCTTTTGGAAATATCTTGAAGAAAAATATGAAGAGCATTTGTATGAGCGC  
GATGAAGGTGATAAATGGCGAAACAAAAAGTTTGAATTGGGTTTGGAGTTTCCCAATCTTCCTTATTATA  
TTGATGGTGATGTTAAATTAACACAGTCTATGGCCATCATACTGTTATATAGCTGACAAGCACAACATGTT  
GGGTGGTTGTCCAAAAGAGCGTGCAGAGATTTCAATGCTTGAAGGAGCGGTTTTTGGATATTAGATACGGT  
GTTTCGAGAATTGCATATAGTAAAGACTTTGAAACTCTCAAAGTTGATTTTCTTAGCAAGCTACCTGAAA  
TGCTGAAAATGTTCAAGATCGTTTATGTCATAAAACATATTTAAATGGTGATCATGTAACCCATCCTGA  
CTTCATGTTGTATGACGCTCTTGATGTTGTTTTATACATGGACCAATGTGCCTGGATGCGTTCCCAAAA  
TTAGTTTGTTTAAAAACGTATTGAAGCTATCCCACAAATTGATAAGTACTTGAAATCCAGCAAGTATA  
TAGCATGGCCTTTCAGGGCTGGCAAGCCACGTTTGGTGGTGGCGACCATCCTCCGAAATCTGGCGAAGA  
TCTGGAACAGAAGCTTATCTCCGAAGAGGACCTGGAGGATCCGGAAGTTAAACAGGAGAACCGGTTATTA  
AATGAATCAGAATCAAGTTCCAGGGGTTACTAGGATACTATTTTAGTGATTTGAATTTTCAAGCACCCA  
TGGTGGTTACCTCTTCTACTACAGGGGATTTATCTATTCCTAGTTCTGAGTTAGAAAATATTCCATCGGA  
AAACCAATATTTTCAATCTGCTATTTGGTCAGGATTTATCAAAGTTAAGAAGAGTGATGAATATACATTT  
GCTACTTCCGCTGATAATCATGTAACAATGTGGGTAGATGACCAAGAAGTGATTAATAAAGCTTCTAATT  
CTAACAAAATCAGATTAGAAAAAGGAAGATTATATCAAATAAAAATTC AATATCAACGAGAAAATCCTAC  
TGAAAAAGGATTGGATTTCAAGTTG TACTGGACCGATTCTCAAATAAAAAAGAAGTGATTTCTAGTGAT  
AACTTACAATTGCCAGAATTAAAACAAAAATCTTCGAACTCAAGAAAAAAGCGAAGTACAAGTGCTGGAC  
CTACGGTTCCAGACCGTGACAATGATGGAATCCCTGATTCATTAGAGGTAGAAGGATATACGGTTGATGT  
CAAAAATAAAAAGAACTTTTCTTTCACCATGGATTTCTAATATTCATGAAAAGAAAGGATTAACCAATAT  
AAATCATCTCCTGAAAAATGGAGCACGGCTTCTGATCCGTACAGTGATTTTCGAAAAGGTTACAGGACGGA  
TTGATAAGAATGTATCACCAGAGGCAAGACACCCCTTGTGGCAGCTTAACTCGAGCACCACCACCACCA  
CCACTGAGATCCGGCTGCTAACAAAGCCCGAA

**S1 Fig. An expression cassette of pET-PA-D1 vector.** Colours: magenta – GST protein, cyan - c-Myc peptide, yellow - I PA domain polypeptide.
