# Supplementary material for: Characterization of the adaptive immune response of donors receiving live anthrax vaccine
Source: PubMed Central journal article supplement (PMC8687594; doi:10.1371/journal.pone.0260202), 2021-12-20
Supplement: pone.0260202.s003.pdf [file pone.0260202.s003.pdf]

TCTCGATCCCGCGAAATTAATACGACTCACTATAGGGGAATTGTGAGCGGATAACAATTCCCCTCTAGAA  
ATAATTTTGTTTAACTTTAAGAAGGAGATATACATATGTCCCCTATACTAGGTTATTGGAAAATTAAGGG  
CCTTGTGCAACCCACTCGACTTCTTTTGGAAATATCTTGAAGAAAAATATGAAGAGCATTTGTATGAGCGC  
GATGAAGGTGATAAATGGCGAAACAAAAAGTTTGAATTGGGTTTGGAGTTTCCCAATCTTCCTTATTATA  
TTGATGGTGATGTTAAATTAACACAGTCTATGGCCATCATACTGTTATATAGCTGACAAGCACAACATGTT  
GGTGGTTGTCCAAAAGAGCGTGCAGAGATTTCAATGCTTGAAGGAGCGGTTTTTGGATATTAGATACGGT  
GTTTCGAGAATTGCATATAGTAAAGACTTTGAAACTCTCAAAGTTGATTTTCTTAGCAAGCTACCTGAAA  
TGCTGAAAATGTTCGAAGATCGTTTATGTCATAAAACATATTTAAATGGTGATCATGTAACCCATCCTGA  
CTTCATGTTGTATGACGCTCTTGATGTTGTTTTATACATGGACCAATGTGCCTGGATGCGTTCCCAAAA  
TTAGTTTGTTTAAAAACGTATTGAAGCTATCCACAAAATTGATAAGTACTTGAAATCCAGCAAGTATA  
TAGCATGGCCTTTGCAGGGCTGGCAAGCCACGTTTGGTGGTGGCGACCATCCTCCGAAATCTGGCGAAGA  
TCTGGAACAGAAGCTTATCTCCGAAGAGGACCTGGAGGATCCGTATCCGATTGTACATGTAGATATGGAG  
AATATTATCTCAAAAAATGAGGATCAATCCACACAGAATACTGATAGTCAAACGAGAACAATAAGTAAAA  
ATACTTCTACAAGTAGGACACATACTAGTGAAGTACATGGAAATGCAGAAGTGCATGCGTCTCTTTGA  
TATTGGTGGGAGTGTATCTGCAGGATTTAGTAATTCGAATTC AAGTACGGTTCGCAATTGATCATTCACTA  
TCTCTAGCAGGGGAAAGA AACTTGGGCTGAAACAATGGGTTTAAATACCGCTGATACAGCAAGATTA AATG  
CCAATATTAGATATGTAAATACTGGGACGGCTCCAATCTACAACGTGTTACCAACGACTTCGTTAGTGTT  
AGGAAAAAATCAAACACTCGCGACAATTAAGCTAAGGAAAACCAATTAAGTCAAATACTTGCACCTAAT  
AATTATTATCCTTCTAAAAACTTGGCGCCAATCGCATTAAATGCACAAGACGATTT CAGTTCTACTCCAA  
TTACAATGAATTACAATCAATTTCTTGAGTTAGAAAAAACGAAACAATTAAGATTAGATACGGATCAAGT  
ATATGGGAATATAGCAACATAACAATTTTAAAAATGGAAGAGTGAGGGTGGATACAGGCTCGAACTGGAGT  
GAAGTGTTACCGCAAATTC AAGAAACA TAACTCGAGCACCACCACCACCACCCTGAGATCCGGCTGCTA  
ACAAAGCCCCGAA

**S3 Fig. An expression cassette of pET-PA-D2 vector.** Colours: magenta – GST protein, cyan - c-Myc peptide, yellow - II PA domain polypeptide.
