# Supplementary material for: Characterization of the adaptive immune response of donors receiving live anthrax vaccine
Source: PubMed Central journal article supplement (PMC8687594; doi:10.1371/journal.pone.0260202), 2021-12-20
Supplement: pone.0260202.s005.pdf [file pone.0260202.s005.pdf]

TCTCGATCCCGCGAAATTAATACGACTCACTATAGGGGAATTGTGAGCGGATAACAATTCCCCTCTAGAA  
ATAATTTTGTTTAACTTTAAGAAGGAGATATACATATGTCCCCTATACTAGGTTATTGGAAAATTAAGGG  
CCTTGTGCAACCCACTCGACTTCTTTTGGAAATATCTTGAAGAAAAATATGAAGAGCATTTGTATGAGCGC  
GATGAAGGTGATAAATGGCGAAACAAAAAGTTTGAATTGGGTTTGGAGTTTCCCAATCTTCCTTATTATA  
TTGATGGTGATGTTAAATTAACACAGTCTATGGCCATCATACTTATATAGCTGACAAGCACAACATGTT  
GGTGGTTGTCCAAAAGAGCGTGCAGAGATTTCAATGCTTGAAGGAGCGGTTTTTGGATATTAGATACGGT  
GTTTCGAGAATTGCATATAGTAAAGACTTTGAAACTCTCAAAGTTGATTTTCTTAGCAAGCTACCTGAAA  
TGCTGAAAATGTTTGAAGATCGTTTATGTCATAAAACATATTTAAATGGTGATCATGTAACCCATCCTGA  
CTTCATGTTGTATGACGCTCTTGATGTTGTTTTATACATGGACCAATGTGCCTGGATGCGTTCCCAAAA  
TTAGTTTGTTTAAAAACGTATTGAAGCTATCCCACAAATTGATAAGTACTTGAAATCCAGCAAGTATA  
TAGCATGGCCTTTGCAGGGCTGGCAAGCCAGTTTGGTGGTGGCGACCATCCTCCGAAATCTGGCGAAGA  
TCTGGAACAGAAGCTTATCTCCGAAGAGGACCTGGAGGATCCGACTGCACGTATCATTTTTTAATGGAAAA  
GATTTAAATCTGGTAGAAAGGCGGATAGCGGCGGTTAATCCTAGTGATCCATTAGAAACGACTAAACCGG  
ATATGACATTAAGAAGCCCTTAAATAGCATTGGATTAAACGAACCGAATGGAACTTACAATATCA  
AGGAAAGACATAACCGAATTTGATTTAATTTTCGATCAACAAACATCTCAAATATCAAGAATCAGTTA  
GCGGAATTAACGTAACATAACATATATACTGTATTAGATAAAATCAAATTAATGCAAAAATGAATATTT  
TAATAAGAGATAAAATACTCGAGCACCACCACCACCACCCTGAGATCCGGCTGCTAACAAAGCCCGAA

**S5 Fig. An expression cassette of pET-PA-D3 vector.** Colours: magenta – GST protein, cyan - c-Myc peptide, yellow - III PA domain polypeptide.
