# Supplementary material for: Characterization of the adaptive immune response of donors receiving live anthrax vaccine
Source: PubMed Central journal article supplement (PMC8687594; doi:10.1371/journal.pone.0260202), 2021-12-20
Supplement: pone.0260202.s006.pdf [file pone.0260202.s006.pdf]

MSPILGYWKIKGLVQPTRLLEYLEEKYEEHLYERDEGDKWRNKKFELGLEFPNLPYYIDGDVKLTQSMA  
IIRYIADKHNMLGGCPKERAEISMLEGAVLDIRYGVSRIAYSKDFETLKVDFLSKLPEMLKMFEDRLCHK  
TYLNGDHVTHPDFMLYDALDVVLYMDPMCLDAFPKLVCFKKRIEAI PQIDKYLKSSKYIAWPLQGWQATF  
GGGDHPPKSGEDLEQKLI SEEDLEDP TARIIFNGKDLNLVERRIAAVNPSDPLETTKPDMTLKEALKIAF  
GFNEPNGNLQYQGKDITEFDNFQQTSONIKNQLAELNATNIYTVLDKIKLNAKMNILIRDK

**S6 Fig. Amino acid sequence of the expressed protein GST-containing III PA domain protein.** Colours: magenta – GST protein, cyan - c-Myc peptide, yellow - III PA domain polypeptide.
