# Supplementary material for: Characterization of the adaptive immune response of donors receiving live anthrax vaccine
Source: PubMed Central journal article supplement (PMC8687594; doi:10.1371/journal.pone.0260202), 2021-12-20
Supplement: pone.0260202.s007.pdf [file pone.0260202.s007.pdf]

TCTCGATCCCGCGAAATTAATACGACTCACTATAGGGGAATTGTGAGCGGATAACAATTCCCCTCTAGAA  
ATAATTTTGTTTAACTTTAAGAAGGAGATATACATATGTCCCCTATACTAGGTTATTGGAAAATTAAGGG  
CCTTGTGCAACCCACTCGACTTCTTTTGGAAATATCTTGAAGAAAAATATGAAGAGCATTTGTATGAGCGC  
GATGAAGGTGATAAATGGCGAAACAAAAAGTTTGAATTGGGTTTGGAGTTTCCCAATCTTCCTTATTATA  
TTGATGGTGATGTTAAATTAACACAGTCTATGGCCATCATACGTTATATAGCTGACAAGCACAACATGTT  
GGTGGTTGTCCAAAAGAGCGTGCAGAGATTTCAATGCTTGAAGGAGCGGTTTTTGGATATTAGATACGGT  
GTTTCGAGAATTGCATATAGTAAAGACTTTGAAACTCTCAAAGTTGATTTTCTTAGCAAGCTACCTGAAA  
TGCTGAAAATGTTCAAGATCGTTTATGTCATAAAACATATTTAAATGGTGATCATGTAACCCATCCTGA  
CTTCATGTTGTATGACGCTCTTGATGTTGTTTTATACATGGACCAATGTGCCTGGATGCGTTCCCAAAA  
TTAGTTTGTTTAAAAAACGTATTGAAGCTATCCCACAAATTGATAAGTACTTGAAATCCAGCAAGTATA  
TAGCATGGCCTTTGCAGGGCTGGCAAGCCAGTTTGGTGGTGGCGACCATCCTCCGAAATCTGGCGAAGA  
TCTGGAACAGAAGCTTATCTCCGAAGAGGACCTGGAGGATCCGTTTCATTATGATAGAAATAACATAGCA  
GTTGGGGCGGATGAGTCAGTAGTTAAGGAGGCTCATAGAGAAGTAATTAATTCGTCAACAGAGGGATTAT  
TGTTAAATATTGATAAGGATATAAGAAAAATATTATCAGGTTATATTGTAGAAATTGAAGATACTGAAGG  
GCTTAAAGAAGTTATAAATGACAGATATGATATGTTGAATATTTCTAGTTTACGGCAAGATGGAAAAACA  
TTTATAGATTTTAAAAAATATAATGATAAATTACCGTTATATATAAGTAATCCCAATTATAAGGTAAATG  
TATATGCTGTTACTAAAGAAAACACTATTATTAATCCTAGTGAGAATGGGGATACTAGTACCAACGGGAT  
CAAGAAAATTTAATCTTTTCTAAAAAAGGCTATGAGATAGGATTAACCTCGAGCACCACCACCACCACC  
TGAGATCCGGCTGCTAACAAAGCCCGAA

**S7 Fig. An expression cassette of pET-PA-D4 vector.** Colours: magenta – GST protein, cyan - c-Myc peptide, yellow - IV PA domain polypeptide.
