# Supplementary material for: Characterization of the adaptive immune response of donors receiving live anthrax vaccine
Source: PubMed Central journal article supplement (PMC8687594; doi:10.1371/journal.pone.0260202), 2021-12-20
Supplement: pone.0260202.s009.pdf [file pone.0260202.s009.pdf]

TCTCGATCCCGCGAAATTAATACGACTCACTATAGGGGAATTGTGAGCGGATAACAATTCCCCTCTAGAA  
ATAATTTTGTTTAACTTTAAGAAGGAGATATACATATGTCCCCTATACTAGGTTATTGGAAAATTAAGGG  
CCTTGTGCAACCCACTCGACTTCTTTTGGAAATATCTTGAAGAAAAATATGAAGAGCATTTGTATGAGCGC  
GATGAAGGTGATAAATGGCGAAACAAAAAGTTTGAATTGGGTTTGGAGTTTCCCAATCTTCCTTATTATA  
TTGATGGTGATGTTAAATTAACACAGTCTATGGCCATCATACTTATATAGCTGACAAGCACAACATGTT  
GGGTGGTTGTCCAAAAGAGCGTGCAGAGATTTCAATGCTTGAAGGAGCGGTTTTTGGATATTAGATACGGT  
GTTTCGAGAATTGCATATAGTAAAGACTTTGAAACTCTCAAAGTTGATTTTCTTAGCAAGCTACCTGAAA  
TGCTGAAAATGTTTGAAGATCGTTTATGTCATAAAACATATTTAAATGGTGATCATGTAACCCATCCTGA  
CTTCATGTTGTATGACGCTCTTGATGTTGTTTTATACATGGACCAATGTGCCTGGATGCGTTCCCAAAA  
TTAGTTTGTTTAAAAACGTATTGAAGCTATCCCACAAATTGATAAGTACTTGAAATCCAGCAAGTATA  
TAGCATGGCCTTTGCAGGGCTGGCAAGCCACGTTTGGTGGTGGCGACCATCCTCCGAAATCTGGCGAAGA  
TCTGGAACAGAAGCTTATCTCCGAAGAGGACCTGGAGGATCCGGCGGGCGGCCATGGCGATGTGGGCATG  
CATGTGAAAGAAAAAGAAAAAACAAAGATGAAAACAAACGCAAAGATGAAGAACGCAACAAAACCCAGG  
AAGAACATCTGAAAGAAATTATGAAACATATTGTGAAAATTGAAGTGAAGGCGAAGAAGCGGTGAAAAA  
AGAAGCGGCGGAAAAACTGCTGGAAAAAGTGCCGAGCGATGTGCTGGAAATGTATAAAGCGATTGGCGGC  
AAAATTTATATTGTGGATGGCGATATTACCAAACATATTAGCCTGGAAGCGCTGAGCGAAGATAAAAAAA  
AAATTAAGATATTTATGGCAAAGATGCGCTGCTGCATGAACATTATGTGTATGCGAAAGAAGGCTATGA  
ACCGGTGCTGGTGATTCAGAGCAGCGAAGATTATGTGGAAAACACCGAAAAAGCGCTGAACGTGTATTAT  
GAAATTGGCAAAATTCTGAGCCGCGATATTCTGAGCAAAATTAACCAGCCGTATCAGAAATTTCTGGATG  
TGCTGAACACCATTAAAAACGCGAGCGATAGCGATGGCCAGGATCTGCTGTTTACCAACCAGCTGAAAGA  
ACATCCGACCGATTTTAGCGTGGAATTTCTGGAACAGAACAGCAACGAAGTGCAGGAAGTGTGTGCGAAA  
GCGTTTGCATATTATATTGAACCGCAGCATCGCGATGTGCTGCAGCTGTATGCGCCGGAAGCGTTTAACT  
ATATGGATAAAATTAACGAACAGGAAATTAACCTGAGCCTGGAAGAAGTAACTAACTCGAGCA  
CCACCACCACCACCCTGAGATCCGGCTGCTAACAAAGCCCGAA

**S9 Fig. An expression cassette of pET-LF-D1 vector.** Colours: magenta – GST protein, cyan - c-Myc peptide, yellow - I LF domain polypeptide.
