# Supplementary material for: Characterization of the adaptive immune response of donors receiving live anthrax vaccine
Source: PubMed Central journal article supplement (PMC8687594; doi:10.1371/journal.pone.0260202), 2021-12-20
Supplement: pone.0260202.s011.pdf [file pone.0260202.s011.pdf]

TCTCGATCCCGCGAAATTAATACGACTCACTATAGGGGAATTGTGAGCGGATAACAATTCCCCTCTAGAA  
ATAATTTTGTTTAACTTTAAGAAGGAGATATACATATGTCCCCTATACTAGGTTATTGGAAAATTAAGGG  
CCTTGTGCAACCCACTCGACTTCTTTTGAATATCTTGAAGAAAAATATGAAGAGCATTTGTATGAGCGC  
GATGAAGGTGATAAATGGCGAAACAAAAAGTTTGAATTGGGTTTGGAGTTTCCCAATCTTCCTTATTATA  
TTGATGGTGATGTTAAATTAACACAGTCTATGGCCATCATACGTTATATAGCTGACAAGCACAACATGTT  
GGGTGGTTGTCCAAAAGAGCGTGCAGAGATTTCAATGCTTGAAGGAGCGGTTTTTGGATATTAGATACGGT  
GTTTCGAGAATTGCATATAGTAAAGACTTTGAAACTCTCAAAGTTGATTTTCTTAGCAAGCTACCTGAAA  
TGCTGAAAATGTTTGAAGATCGTTTATGTCATAAAACATATTTAAATGGTGATCATGTAACCCATCCTGA  
CTTCATGTTGTATGACGCTCTTGATGTTGTTTTATACATGGACCAATGTGCCTGGATGCGTTCCCAAAA  
TTAGTTTGTTTAAAAACGTATTGAAGCTATCCCACAAATTGATAAGTACTTGAAATCCAGCAAGTATA  
TAGCATGGCCTTTGCAGGGCTGGCAAGCCACGTTTGGTGGTGGCGACCATCCTCCGAAATCTGGCGAAGA  
TCTGGAACAGAAGCTTATCTCGAAGAGGACCTGGAGGATCCGCGGATGCTGGCAAGATATGAAAAATGG  
GAAAAGATAAAAACAGCACTATCAACACTGGAGCGATTCTTTATCTGAAGAAGGAAGAGGACTTTTAAAAA  
AGCTGCAGATTCCCTATTGAGCCAAAGAAAGATGACATAATTCATTCTTTATCTCAAGAAGAAAAAGAGCT  
TCTAAAAAGAATACAAATTGATAGTAGTGATTTTTTATCTACTGAGGAAAAAGAGTTTTTAAAAAAGCTA  
CAAATTGATATTCGTGATTCTTTATCTGAAGAAGAAAAAGAGCTTTTAAATAGAATACAGGTGGATAGTA  
GTAATCCTTTATCTGAAAAAGAAAAAGAGTTTTTAAAAAAGCTGAAACTTGATATTCAACCATATGATAT  
TAATCAAAGGTTGCAAGATACAGGAGGGTTAATTGATAGTCCGTCAATTAATCTTGATGTAAGAAAGCAG  
TATAAAAGGGATATTCAAAATATTGATGCTTTATTACATCAATCCATTGGAAGTACCTTGTACAATAAAA  
TTTATTTGTATGAAAATATGAATATCAATAACCTTACAGCAACCCTAGGTGCGGATTTAGTTGATTCCAC  
TGATAATACTAAAATTAATAGAGGTATTTCAATGAATTCAAAAAAATTTCAAATATAGTATTTCTAGT  
AACTATATGATTGTTGATATAAATGAAAGGCCTGCATTAGATAATGAGCGTTTGAATGGAGAATCCAAT  
TATCACCAGATACTCGAGCAGGATATTTAGAAAATGGAAAGCTTATATTACAAAGAAACATCGGTCTGGA  
AATAAAGGATGTACAAATAATTAAGCAATCCGAAAAAGAATATATAAGGATTGATGCGAAAGTAGTGCC  
AACTCGAGCACCACCACCACCACCCTGAGATCCGGCTGCTAACAAAGCCCGAA

**S11 Fig. An expression cassette of pET-LF-D2.3 vector.** Colours: magenta – GST protein, cyan - c-Myc peptide, yellow – II+III LF domain polypeptide.
