# Supplementary material for: Characterization of the adaptive immune response of donors receiving live anthrax vaccine
Source: PubMed Central journal article supplement (PMC8687594; doi:10.1371/journal.pone.0260202), 2021-12-20
Supplement: pone.0260202.s012.pdf [file pone.0260202.s012.pdf]

MSPILGYWKIKGLVQPTRLLEYLEEKYEEHLYERDEGDKWRNKKFELGLEFPNLPYYIDGDVKLTQSMA  
IIRYIADKHNMLGGCPKERAEISMLEGAVLDIRYGVSRIAYSKDFETLKVDFLSKLPEMLKMFEDRLCHK  
TYLNGDHVTHPDFMLYDALDVVLYMDPMCLDAFPKLVCFKKRIEAI PQIDKYLKSSKYIAWPLQGWQATF  
GGGDHPPKSGEDLEQKLI SEEDLEDP RMLARYEKWEKIKQHYQHWSDSLSEEGRGLLKKLQIPIEPKDD  
IIHSLSQEEKELLKRIQIDSSDFLSTEEKEFLKKLQIDIRDSLSEEEKELLNRIQVDSSNPLSEKEKEFL  
KKLKLDIQPYDINQRLQDTGGLIDSPSINLDVRKQYKRDIQNIDALLHQSIGSTLYNKIYLYENMNINNL  
TATLGADLV DSTDNTKINRGI FNEFKKNFKYSSISSNYMIVDINERPALDNERLKWRIQLSPDTRAGYLEN  
GKLILQRNIGLEIKDVQIIKQSEKEYIRIDAKVV

**S12 Fig. Amino acid sequence of the expressed protein GST-containing II+III LF domain protein.** Colours: magenta – GST protein, cyan - c-Myc peptide, yellow – II+III LF domain polypeptide.
