# Supplementary material for: Characterization of the adaptive immune response of donors receiving live anthrax vaccine
Source: PubMed Central journal article supplement (PMC8687594; doi:10.1371/journal.pone.0260202), 2021-12-20
Supplement: pone.0260202.s013.pdf [file pone.0260202.s013.pdf]

TCTCGATCCCGCGAAATTAATACGACTCACTATAGGGGAATTGTGAGCGGATAACAATTCCCCTCTAGAA  
ATAATTTTGTTTAACTTTAAGAAGGAGATATACATATGTCCCCTATACTAGGTTATTGGAAAATTAAGGG  
CCTTGTGCAACCCACTCGACTTCTTTTGGAAATATCTTGAAGAAAAATATGAAGAGCATTTGTATGAGCGC  
GATGAAGGTGATAAATGGCGAAACAAAAAGTTTGAATTGGGTTTGGAGTTTCCCAATCTTCCTTATTATA  
TTGATGGTGATGTTAAATTAACACAGTCTATGGCCATCATACGTTATATAGCTGACAAGCACAACATGTT  
GGTGGTTGTCCAAAAGAGCGTGCAGAGATTTCAATGCTTGAAGGAGCGGTTTTTGGATATTAGATACGGT  
GTTTCGAGAATTGCATATAGTAAAGACTTTGAAACTCTCAAAGTTGATTTTCTTAGCAAGCTACCTGAAA  
TGCTGAAAATGTTTGAAGATCGTTTATGTCATAAAACATATTTAAATGGTGATCATGTAACCCATCCTGA  
CTTCATGTTGTATGACGCTCTTGATGTTGTTTTATACATGGACCAATGTGCCTGGATGCGTTCCCAAAA  
TTAGTTTGTTTAAAAACGTATTGAAGCTATCCCACAAATTGATAAGTACTTGAAATCCAGCAAGTATA  
TAGCATGGCCTTTCAGGGCTGGCAAGCCACGTTTGGTGGTGGCGACCATCCTCCGAAATCTGGCGAAGA  
TCTGGAACAGAAGCTTATCTCCGAAGAGGACCTGGAGGATCCGAAGAGTAAAATAGATACAAAAATTCAA  
GAAGCACAGTTAAATATAAATCAGGAATGGAATAAAGCATTAGGGTTACCAAAATATACAAAGCTTATTA  
CATTCAACGTGCATAATAGATATGCATCCAATATTGTAGAAAAGTGCTTATTTAATATTGAATGAATGGAA  
AAATAATATTCAAAGTGATCTTATAAAAAAGGTAACAAATTACTTAGTTGATGGTAATGGAAGATTTGTT  
TTTACCGATATTACTCTCCCTAATATAGCTGAACAATATACACATCAAGATGAGATATATGAGCAAGTTC  
ATTCAAAAGGGTTATATGTTCCAGAATCCCGTTCTATATTACTCCATGGACCTTCAAAGGTGTAGAATT  
AAGGAATGATAGTGAGGGTTTTATACACGAATTTGGACATGCTGTGGATGATTATGCTGGATATCTATTA  
GATAAGAACCAATCTGATTTAGTTACAAATTCTAAAAAATTCATTGATATTTTTAAGGAAGAAGGGAGTA  
ATTTAACTTCGTATGGGAGAACAAATGAAGCGGAATTTTTTGCAGAAGCCTTTAGGTTAATGCATTCTAC  
GGACCATGCTGAACGTTTAAAAAGTTCAAAAAAATGCTCCGAAAACCTTCCAATTTATTAACGATCAGATT  
AAGTTCATTATTAACCTCACTAACTCGAGCACCACCACCACCACCCTGAGATCCGGCTGCTAACAAAGCCC  
GAA

**S13 Fig. An expression cassette of pET-LF-D4 vector.** Colours: magenta – GST protein, cyan - c-Myc peptide, yellow – IV LF domain polypeptide.
