# Supplementary material for: Characterization of the adaptive immune response of donors receiving live anthrax vaccine
Source: PubMed Central journal article supplement (PMC8687594; doi:10.1371/journal.pone.0260202), 2021-12-20
Supplement: pone.0260202.s015.pdf [file pone.0260202.s015.pdf]

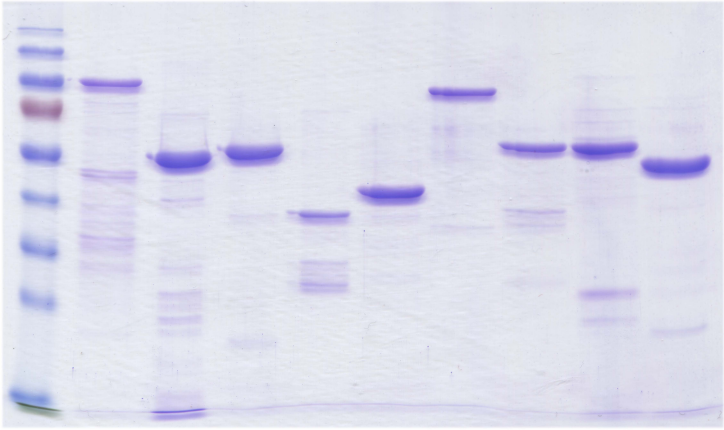

kDa

180  
130  
100  
70  
55  
40  
35  
25  
15

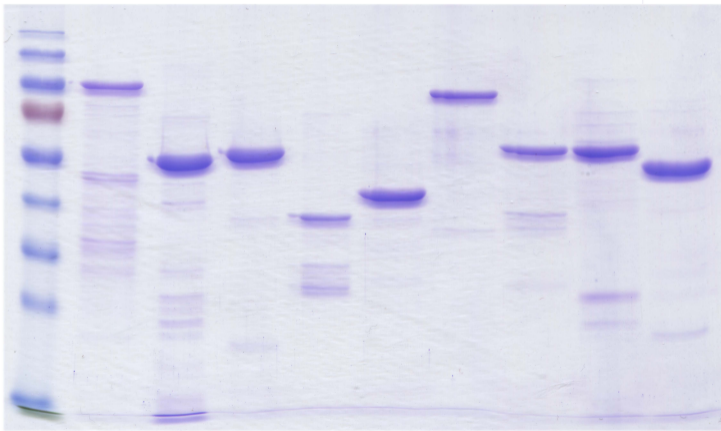

1 2 3 4 5 6 7 8 9 10
