# Supplementary material for: Characterization of the adaptive immune response of donors receiving live anthrax vaccine
Source: PubMed Central journal article supplement (PMC8687594; doi:10.1371/journal.pone.0260202), 2021-12-20
Supplement: pone.0260202.s039.pdf [file pone.0260202.s039.pdf]

**Level of specific IgG PA, LF of *B. anthracis* and domains and levels of TNA in the samples of blood serum from the donors in the control group.**

| Serum samples                | IgG titers to  |                |        |       |       |       |       |       |         |       |          |
|------------------------------|----------------|----------------|--------|-------|-------|-------|-------|-------|---------|-------|----------|
|                              | PA fill-length | LF fill-length | Spores | PA-D1 | PA-D2 | PA-D3 | PA-D4 | LF-D1 | LF-D2.3 | LF-D4 | TNA      |
| 1                            | 100            | 50             | 200    | 100   | 100   | 25    | 25    | 0     | 50      | 0     | 22,5884  |
| 2                            | 0              | 25             | 100    | 25    | 25    | 0     | 0     | 0     | 0       | 0     | 13,64473 |
| 3                            | 0              | 25             | 0      | 25    | 0     | 50    | 0     | 0     | 0       | 0     | 7,89494  |
| 4                            | 400            | 200            | 0      | 0     | 0     | 100   | 100   | 25    | 0       | 0     | 11,95774 |
| 5                            | 200            | 50             | 50     | 500   | 0     | 50    | 50    | 0     | 0       | 25    | 16,8835  |
| 6                            | 50             | 200            | 200    | 100   | 100   | 100   | 0     | 0     | 0       | 0     | 12,5392  |
| 7                            | 200            | 0              | 50     | 50    | 50    | 50    | 50    | 0     | 0       | 100   | 9,47738  |
| 8                            | 400            | 50             | 100    | 50    | 50    | 0     | 0     | 0     | 0       | 50    | 13,88594 |
| 9                            | 0              | 100            | 800    | 50    | 25    | 25    | 0     | 50    | 25      | 0     | 20,9758  |
| 10                           | 50             | 50             | 400    | 0     | 0     | 400   | 200   | 100   | 0       | 25    | 11,85338 |
| 11                           | 400            | 25             | 0      | 0     | 0     | 0     | 50    | 100   | 0       | 0     | 6,9327   |
| 12                           | 100            | 0              | 50     | 0     | 0     | 100   | 50    | 50    | 0       | 0     | 9,833217 |
| 13                           | 0              | 0              | 0      | 25    | 25    | 25    | 0     | 50    | 0       | 0     | 13,74366 |
| 14                           | 25             | 0              | 50     | 25    | 50    | 50    | 0     | 100   | 0       | 0     | 15,6362  |
| 15                           | 400            | 0              | 100    | 0     | 0     | 0     | 25    | 50    | 0       | 0     | 6,8291   |
| 16                           | 50             | 0              | 50     | 0     | 0     | 400   | 400   | 200   | 0       | 0     | 8,9672   |
| 17                           | 0              | 0              | 25     | 25    | 25    | 100   | 0     | 0     | 0       | 0     | 16,6483  |
| 18                           | 100            | 100            | 25     | 25    | 25    | 25    | 25    | 0     | 0       | 0     | 11,81109 |
| 19                           | 50             | 200            | 0      | 0     | 0     | 0     | 0     | 50    | 0       | 50    | 12,082   |
| 20                           | 25             | 100            | 100    | 0     | 0     | 25    | 0     | 0     | 0       | 0     | 10,6428  |
| 21                           | 200            | 0              | 0      | 100   | 100   | 0     | 25    | 0     | 0       | 0     | 8,88675  |
| <b>% of positive samples</b> | 71%            | 62%            | 71%    | 62%   | 47%   | 71%   | 47%   | 33%   | 9%      | 19%   |          |
